# Supplementary material for: A general photochemical strategy for the oximation of activated alkenes without a catalyst
Source: Royal Society of Chemistry journal article supplement (doi:10.1039/d4qo00636d), 2024-01-01
Supplement: d4qo00636d1.pdf [file d4qo00636d1.pdf]

## Supporting Information

### A General Photochemical Strategy for the Oximation of Activated Alkenes without a Catalyst

Hongyan Lan,<sup>1</sup> You Su,<sup>1</sup> Yikun Chen,<sup>2</sup> Xiaozhi He<sup>1,\*</sup>, and Dingyi  
Wang<sup>1,\*</sup>

<sup>1</sup>College of Sciences, Northeastern University, Shenyang 110004, China.

<sup>2</sup>Yichang Humanwell Pharmaceutical Co., Ltd. Yichang 443000, China.

\*Email: [wangdingyi@mail.neu.edu.cn](mailto:wangdingyi@mail.neu.edu.cn); [xiaozhiheneu@163.com](mailto:xiaozhiheneu@163.com);

# 1. Table of Contents

|                                                 |    |
|-------------------------------------------------|----|
| 1. General Experimental Details .....           | 3  |
| 2. Optimization of the Reaction Condition ..... | 4  |
| 3. General Procedures .....                     | 6  |
| 4. Characterization Data of Products .....      | 12 |
| 5. NMR Spectra .....                            | 34 |
| 6. References.....                              | 91 |

# 1. General Experimental Details

Catalytic reactions were performed under a N<sub>2</sub> atmosphere in pre-dried glassware using a Kessil PR160L photoreactor with 425 nm irradiation. The reaction temperature was measured by digital thermometer PCE-T 390, which was in the range of 30 to 32 °C (Room temperature: 22 to 25 °C). Methanol, dichloromethane, ethyl acetate, *n*-hexane and *n*-pentane were distilled prior to use. Other chemicals were purchased from commercial sources (Sigma-Aldrich, Alfa Aesar, TCI, or BLD Pharmatech GmbH) and used without further purification. Reactions were monitored by thin layer chromatography (TLC), using Merck silica gel 60 F254 glass plates (0.25 mm thick). Chromatography was carried out on Merck silica gel 60 (40–63 μm). Data for <sup>1</sup>H NMR are reported as follows: chemical shift (δ), multiplicity (s = singlet, d = doublet, t = triplet, q = quartet, p = quintet, m = multiplet, dd = doublet of doublets, ddd = doublet of double doublets, dt = doublet of triplets), coupling constants (J) were reported in Hertz (Hz). EI-MS was recorded on *Jeol AccuTOF* at 70 eV; ESI-MS was recorded on Bruker Daltonik *micrOTOF* and *maXis*. The ratios of mass to charge (*m/z*) are reported and the intensity relative to the base peak (I = 100) is given in parenthesis. All IR spectra were recorded on a Bruker FT-IR Alpha-P device.

## 2. Optimization of the Reaction Condition

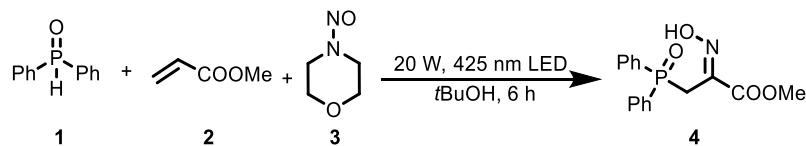

| Entry <sup>a</sup> | <b>1</b><br>(equiv.) | <b>2</b><br>(equiv.) | <b>3</b><br>(equiv.) | Solvent<br>(mL)     | Yield <sup>b</sup><br>(%) | Wavelength<br>(nm) |
|--------------------|----------------------|----------------------|----------------------|---------------------|---------------------------|--------------------|
| 1                  | 1                    | 2                    | 2                    | MeCN (1.0)          | 26                        | 420                |
| 2                  | 1                    | 2                    | 2                    | DMSO (1.0)          | 0                         | 420                |
| 3                  | 1                    | 2                    | 2                    | DMF (1.0)           | 0                         | 420                |
| 4                  | 1                    | 2                    | 2                    | DMA (1.0)           | 0                         | 420                |
| 5                  | 1                    | 2                    | 2                    | DCM (1.0)           | 23                        | 420                |
| 6                  | 1                    | 2                    | 2                    | EtOAc (1.0)         | 18                        | 420                |
| 7                  | 1                    | 2                    | 2                    | Acetone (1.0)       | 37                        | 420                |
| 8                  | 3                    | 2                    | 3                    | EtOH (1.0)          | 51                        | 420                |
| 9                  | 1                    | 2                    | 2                    | <i>t</i> BuOH (1.0) | 42                        | 420                |
| 10                 | 2                    | 1                    | 2                    | <i>t</i> BuOH (1.0) | 54                        | 420                |
| 11                 | 2                    | 1                    | 3                    | <i>t</i> BuOH (1.0) | 58                        | 420                |
| 12                 | 3                    | 2                    | 1                    | <i>t</i> BuOH (1.0) | 60                        | 420                |
| 13                 | 3                    | 1                    | 2                    | <i>t</i> BuOH (1.0) | 67                        | 420                |
| 14                 | 3                    | 1                    | 3                    | <i>t</i> BuOH (1.0) | 89                        | 420                |
| 15                 | 3                    | 1                    | 3                    | <i>t</i> BuOH (1.0) | 61                        | 390                |
| 16                 | 3                    | 1                    | 3                    | <i>t</i> BuOH (1.0) | 59                        | 455                |

<sup>a</sup>Reaction conditions: **1** (0.6 mmol), **2** (0.2 mmol), **3** (0.6 mmol), in *t*BuOH at room temperature under irradiation of LEDs (20 W,  $\lambda = 425$  nm) for 6 hours. <sup>b</sup>Isolated yield.

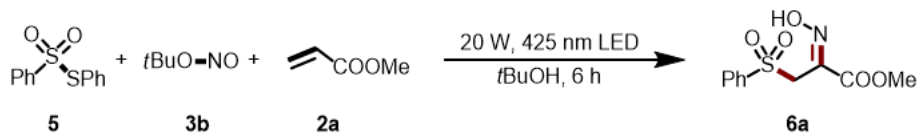

| Entry <sup>a</sup> | <b>5</b><br>(equiv.) | <b>3b</b><br>(equiv.) | <b>2a</b><br>(equiv.) | Solvent<br>(mL)     | Alkali                           | Yield <sup>b</sup><br>(%) | Wavelength<br>(nm) |
|--------------------|----------------------|-----------------------|-----------------------|---------------------|----------------------------------|---------------------------|--------------------|
| 1                  | 3                    | 3                     | 1                     | <i>t</i> BuOH (1.0) | \                                | 22                        | 420                |
| 2                  | 3                    | 3                     | 1                     | <i>t</i> BuOH (1.0) | K <sub>2</sub> HPO <sub>4</sub>  | 16                        | 420                |
| 3                  | 3                    | 3                     | 1                     | <i>t</i> BuOH (1.0) | NaH <sub>2</sub> PO <sub>4</sub> | 15                        | 420                |
| 4                  | 3                    | 3                     | 1                     | <i>t</i> BuOH (1.0) | Na <sub>3</sub> PO <sub>4</sub>  | 15                        | 420                |
| 5                  | 3                    | 3                     | 1                     | <i>t</i> BuOH (1.0) | NaHCO <sub>3</sub>               | 10                        | 420                |
| 6                  | 3                    | 3                     | 1                     | <i>t</i> BuOH (1.0) | NaOH                             | 12                        | 420                |
| 7                  | 3                    | 3                     | 1                     | <i>t</i> BuOH(1.0)  | KOH                              | 15                        | 420                |
| 8                  | 3                    | 3                     | 1                     | <i>t</i> BuOH(1.0)  | NaOMe                            | 14                        | 420                |
| 9                  | 3                    | 3                     | 1                     | <i>t</i> BuOH (1.0) | NaOPiv                           | 20                        | 420                |
| 10                 | 3                    | 4                     | 1                     | <i>t</i> BuOH (1.0) | \                                | 33                        | 420                |
| 11                 | 3                    | 5                     | 1                     | <i>t</i> BuOH (1.0) | \                                | 44                        | 420                |
| 12                 | 3                    | 6                     | 1                     | <i>t</i> BuOH (1.0) | \                                | 60                        | 420                |
| 13                 | 3                    | 7                     | 1                     | <i>t</i> BuOH (1.0) | \                                | 67                        | 420                |
| 14                 | 3                    | 8                     | 1                     | <i>t</i> BuOH (1.0) | \                                | 80                        | 420                |
| 15                 | 3                    | 1                     | 2                     | <i>t</i> BuOH (1.0) | \                                | 30                        | 420                |
| 16                 | 3                    | 1                     | 3                     | <i>t</i> BuOH (1.0) | \                                | 38                        | 420                |

<sup>a</sup>Reaction conditions: **5** (0.6 mmol), **2a** (0.2 mmol), **3b** (1.6 mmol), in *t*BuOH at room temperature under irradiation of LEDs (20 W,  $\lambda = 425$  nm) for 6 hours.

### 3. General Procedures

#### General Procedure 1

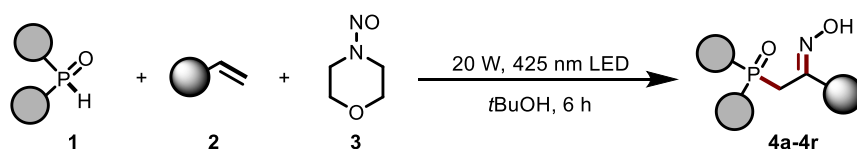

In an oven-dried tube, diphenylphosphine oxide (121.0 mg, 0.6 mmol 3.0 equiv.), 4-nitrosomorpholine (70.0 mg, 0.6 mmol 3.0 equiv.), and alkene (0.20 mmol, 1.0 equiv.), were dissolved in *t*BuOH (1.0 mL). The reaction mixture was stirred and irradiated using a 425 nm LED lamp under N<sub>2</sub> for 6 h. Solvent was removed under reduced pressure, and the residue was purified by column chromatography on silica gel afforded the desired products **4a-4r**.

#### General Procedure 2

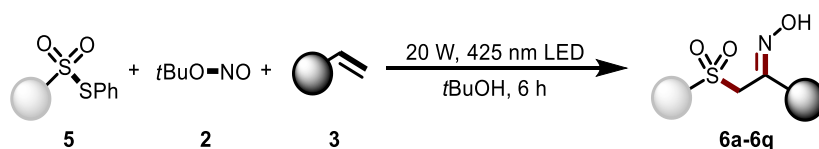

In an oven-dried tube, S-phenyl benzenesulfonylthioate (150.0 mg, 0.6 mmol, 3.0 equiv.), tert-butyl nitrite (165.0 mg, 1.6 mmol, 8.0 equiv.), and alkene (0.20 mmol, 1.0 equiv.), were dissolved in *t*BuOH (1.0 mL). The reaction mixture was stirred and irradiated using a 425-nm LED lamp under N<sub>2</sub> for 6 h. Solvent was removed under reduced pressure, and the residue was purified by column chromatography on silica gel afforded the desired products **6a-6q**.

## General Procedure 3

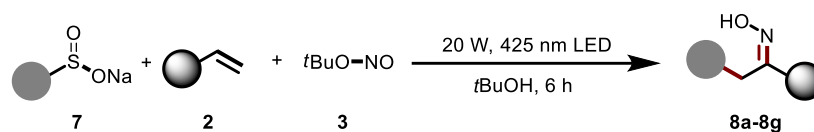

In an oven-dried tube, sodium trifluoromethanesulfinate (94.0 mg, 0.6 mmol 3.0 equiv.), tert-butyl nitrite (165.0 mg, 1.6 mmol, 8.0 equiv.), and alkene (0.20 mmol, 1.0 equiv.), were dissolved in *t*BuOH (1.0 mL). The reaction mixture was stirred and irradiated using a 425-nm LED lamp under N<sub>2</sub> for 6h. Solvent was removed under reduced pressure, and the residue was purified by column chromatography on silica gel afforded the desired products **8a-8g**

## Failed substrates

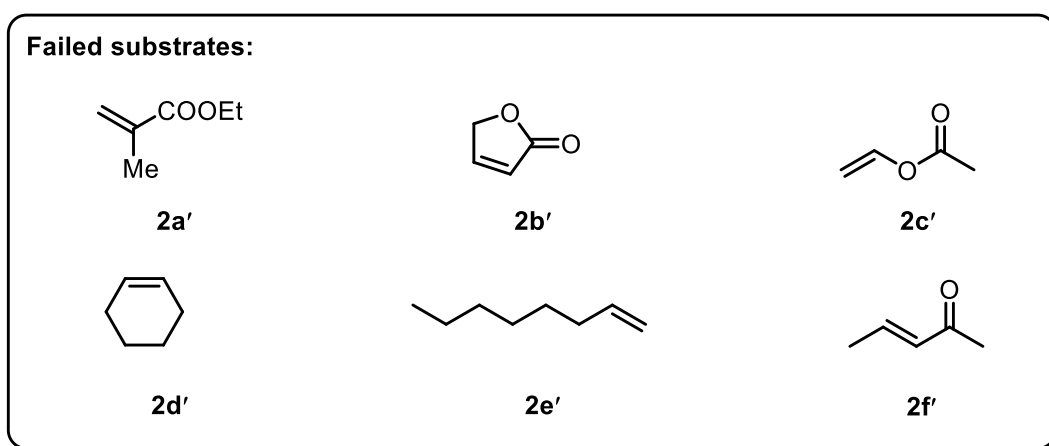

## Mechanistic Studies

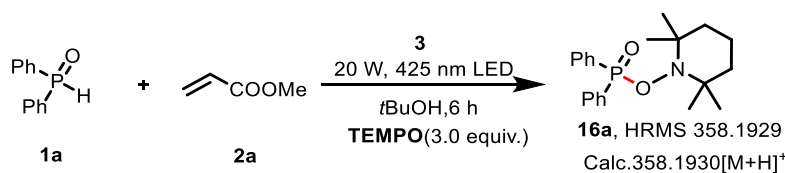

In an oven-dried tube, **1a** (0.6 mmol, 3.0 equiv.), **2a** (0.2 mmol, 1.0 equiv.), **3** (0.6

mmol, 3.0 equiv.), and 2,2,6,6-Tetramethylpiperidinoxy (93.6 mg, 0.6 mmol) were dissolved in *t*BuOH (1.0 mL). The tube was positioned approximately 5 cm away from a 20 W blue LEDs lamp ( $\lambda$  max = 425 nm). After being stirred at 25 °C for 6 h, the reaction mixture was analyzed by HR-MS.

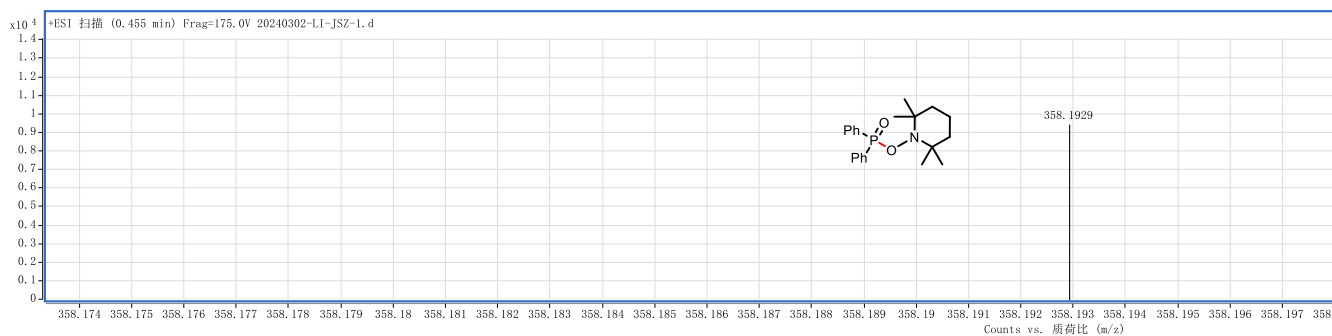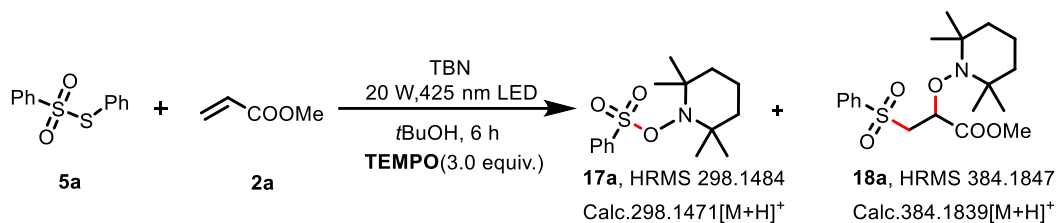

In an oven-dried tube, **5a** (0.6 mmol, 3.0 equiv.), **2a** (0.2 mmol, 1.0 equiv.), TBN (1.6 mmol, 8.0 equiv.), and 2,2,6,6-Tetramethylpiperidinoxy (93.6 mg, 0.6 mmol) were dissolved in *t*BuOH (1.0 mL). The tube was positioned approximately 5 cm away from a 20 W blue LEDs lamp ( $\lambda$  max = 425 nm). After being stirred at 25 °C for 6 h, the reaction mixture was analyzed by HR-MS.

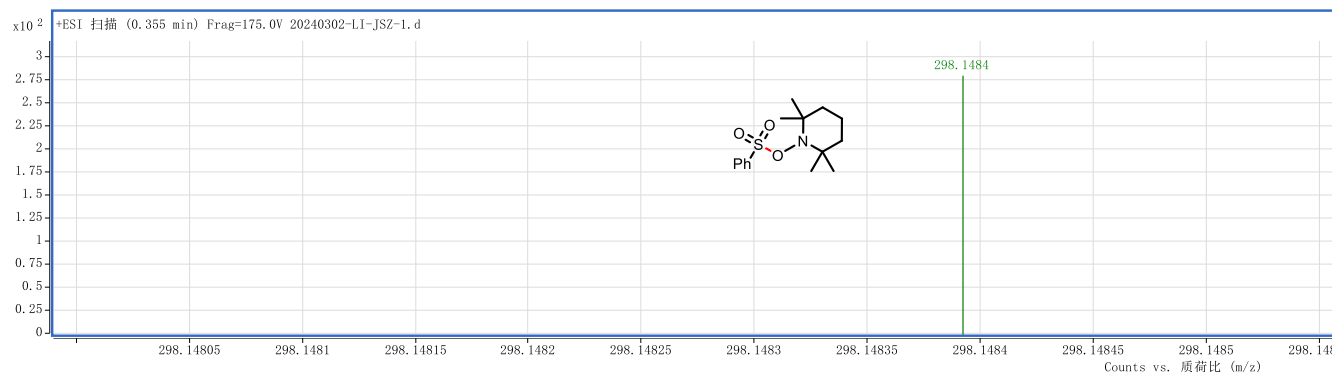



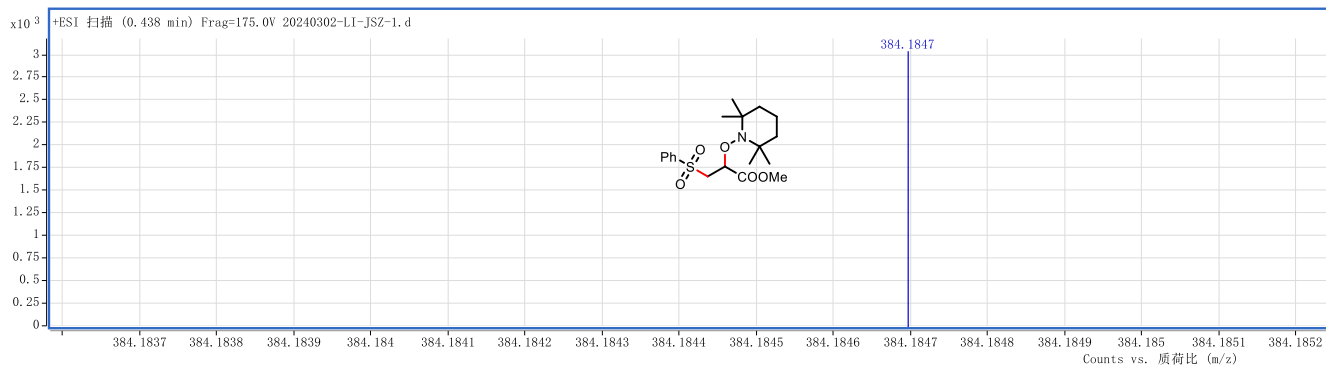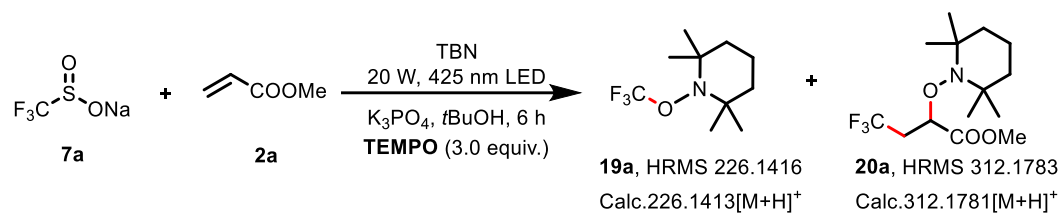

In an oven-dried tube, **7a** (0.6 mmol, 3.0 equiv.), **2a** (0.2 mmol, 1.0 equiv.), TBN (1.6 mmol, 8.0 equiv.),  $K_3PO_4$  (0.4 mmol, 2.0 equiv.) and 2,2,6,6-Tetramethyl piperidinoxy (93.6 mg, 0.6 mmol) were dissolved in *t*BuOH (1.0 mL). The tube was positioned approximately 5 cm away from a 20 W blue LEDs lamp ( $\lambda$  max = 425 nm). After being stirred at 25 °C for 6 h, the reaction mixture was analyzed by HR-MS.

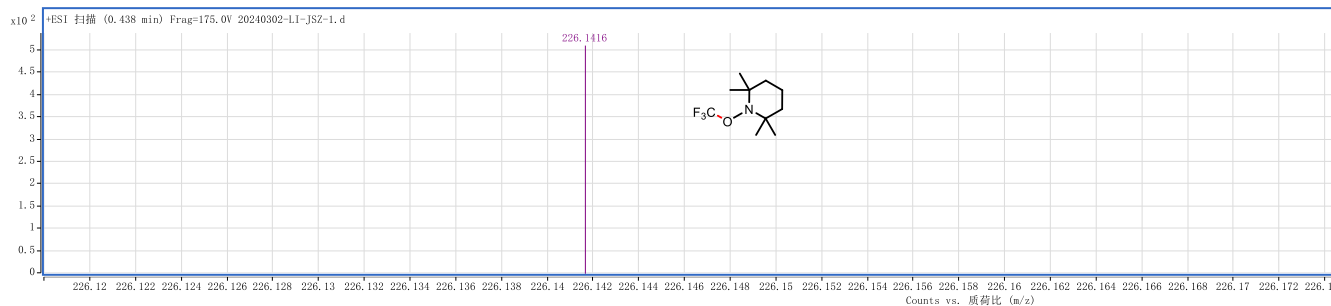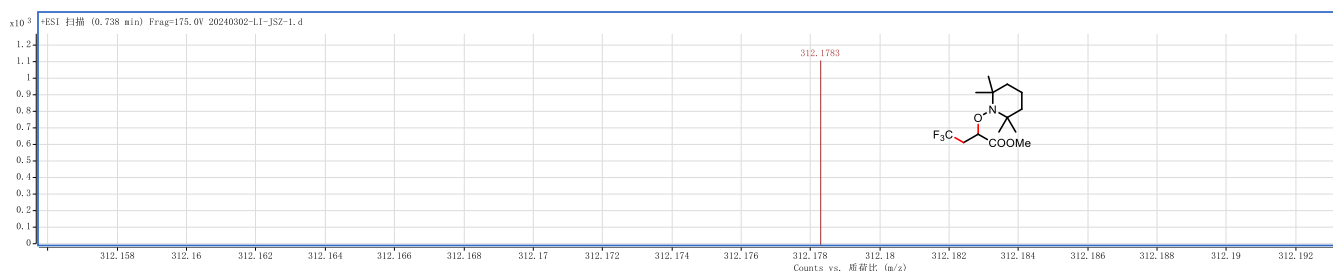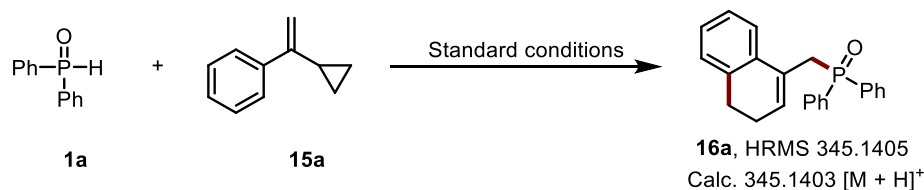

In an oven-dried tube, **1a** (0.6 mmol, 3.0 equiv.), **15a** (0.2 mmol, 1.0 equiv.), and 4-nitrosomorpholine (0.6 mmol, 3.0 equiv.) were dissolved in *t*BuOH (1.0 mL). The tube was positioned approximately 5 cm away from a 20 W blue LEDs lamp ( $\lambda$  max = 425 nm). After being stirred at 25 °C for 6 h, the reaction mixture was analyzed by HR-MS.

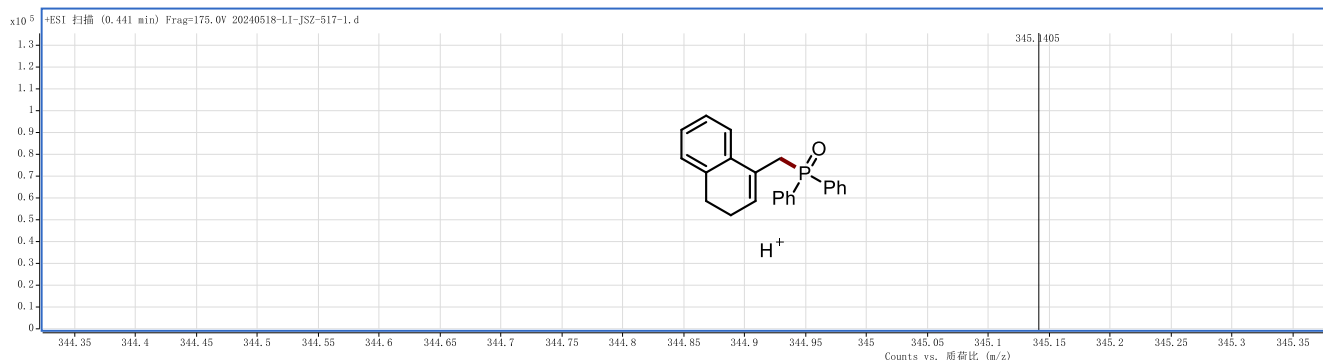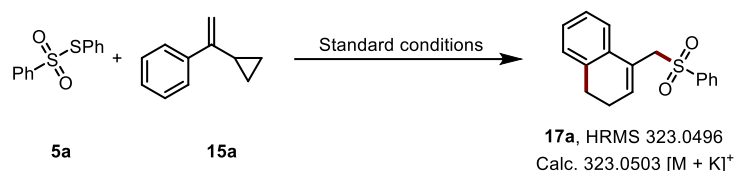

In an oven-dried tube, **5a** (0.6 mmol, 3.0 equiv.), **15a** (0.2 mmol, 1.0 equiv.) and TBN (1.6 mmol, 8.0 equiv.) were dissolved in *t*BuOH (1.0 mL). The tube was positioned approximately 5 cm away from a 20 W blue LEDs lamp ( $\lambda$  max = 425 nm). After being stirred at 25 °C for 6 h, the reaction mixture was analyzed by HR-MS.

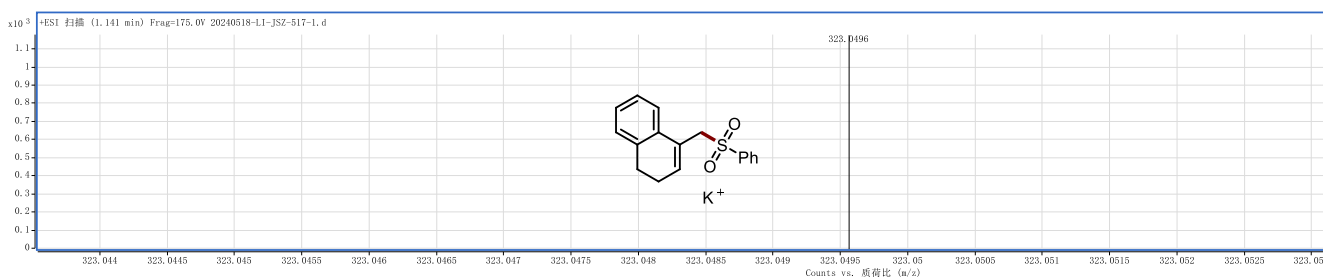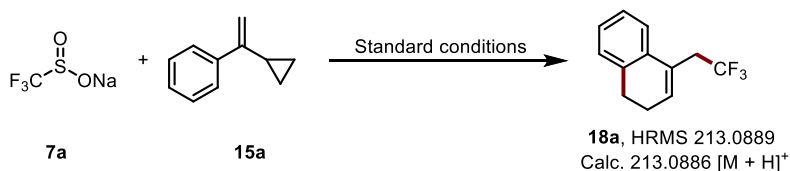

In an oven-dried tube, **7a** (0.6 mmol, 3.0 equiv.), **15a** (0.2 mmol, 1.0 equiv.), TBN (1.6 mmol, 8.0 equiv.) and K<sub>3</sub>PO<sub>4</sub> (0.4 mmol, 2.0 equiv.) were dissolved in *t*BuOH (1.0 mL). The tube was positioned approximately 5 cm away from a 20 W blue LEDs lamp ( $\lambda$  max = 425 nm). After being stirred at 25 °C for 6 h, the reaction mixture was analyzed

by HR-MS.

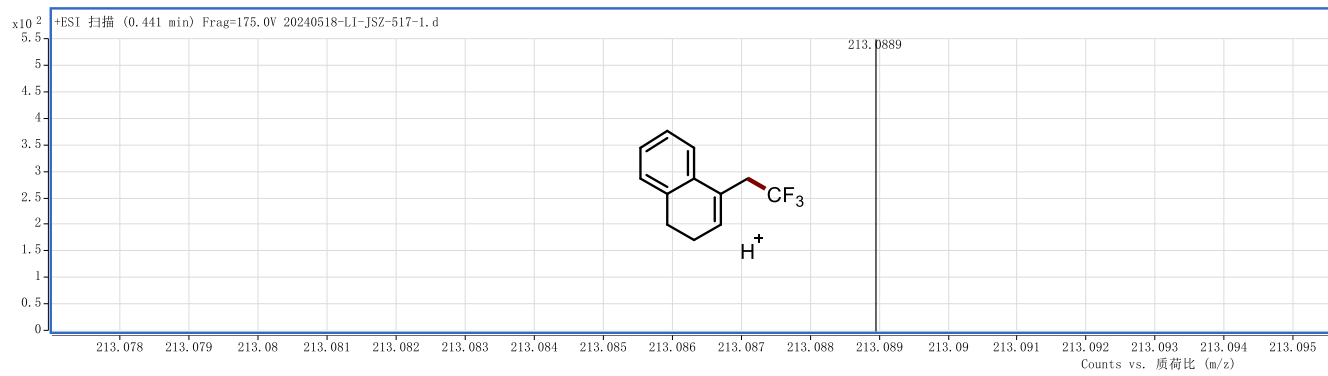

## 4. Characterization Data of Products

### Methyl (E)-3-(diphenylphosphoryl)-2-(hydroxyimino)propanoate (**4a**)

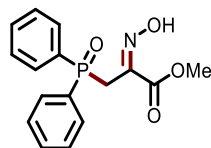

The general procedure 1 was followed using diphenylphosphine oxide (121 mg, 0.6 mmol), 4-nitrosomorpholine (70 mg, 0.6 mmol), methyl acrylate (17.2 mg, 0.2 mmol), and 2-methylpropan-2-ol (1.0 mL), and was purified by silica gel column chromatography (DCM/MeOH = 20/1) to obtain **4a** as colorless oil (56.4 mg, 89% yield). **<sup>1</sup>H NMR** (400 MHz, CDCl<sub>3</sub>):  $\delta$  = 12.99 (s, 1H), 7.88 – 7.80 (m, 4H), 7.56 – 7.52 (m, 2H), 7.50 – 7.41 (m, 4H), 3.93 (d,  $J$  = 14.6 Hz, 2H), 3.61 (s, 3H). **<sup>13</sup>C NMR** (101 MHz, CDCl<sub>3</sub>):  $\delta$  = 164.5 (d,  $J$  = 2.5 Hz), 142.6 (d,  $J$  = 9.8 Hz), 132.2 (d,  $J$  = 2.9 Hz), 132.2 (d,  $J$  = 103.1 Hz), 131.4 (d,  $J$  = 9.9 Hz), 128.7 (d,  $J$  = 12.3 Hz), 52.5, 28.7 (d,  $J$  = 64.8 Hz). **<sup>31</sup>P NMR** (162 MHz, CDCl<sub>3</sub>):  $\delta$  = 29.1. **ATR-FTIR (cm<sup>-1</sup>)**: 3175, 2850, 1821, 1361, 1211, 863, 774, 601. **HR-MS** (ESI) C<sub>16</sub>H<sub>17</sub>NO<sub>4</sub>P [M+H]<sup>+</sup>: 318.0890, found: 318.0888.

### Methyl (E)-3-(di-p-tolylphosphoryl)-2-(hydroxyimino)propanoate (**4b**)

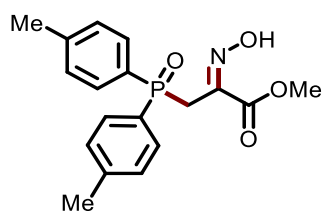

The general procedure 1 was followed using di-p-tolylphosphine oxide (138 mg, 0.6 mmol), 4-nitrosomorpholine (70 mg, 0.6 mmol), methyl acrylate (32.8 mg, 0.2 mmol), and 2-methylpropan-2-ol (1.0 mL), and was purified by silica gel column chromatography (DCM/MeOH = 20/1) to obtain **4b** as colorless oil (55.9 mg, 81% yield). **<sup>1</sup>H NMR** (400 MHz, CDCl<sub>3</sub>):  $\delta$  = 12.98 (s, 1H), 7.71 (m,  $J$  = 11.9, 7.8 Hz, 4H), 7.34 – 7.11 (m, 4H), 3.89 (d,  $J$  = 14.9 Hz, 2H), 3.62 (s, 3H), 2.39 (s, 6H). **<sup>13</sup>C NMR**

(101 MHz, CDCl<sub>3</sub>):  $\delta$  = 164.7 (d,  $J$  = 2.6 Hz), 142.9 (d,  $J$  = 9.8 Hz), 142.6 (d,  $J$  = 2.8 Hz), 131.4 (d,  $J$  = 10.2 Hz), 129.4 (d,  $J$  = 12.6 Hz), 129.1 (d,  $J$  = 105.7 Hz), 52.6, 29.0 (d,  $J$  = 64.6 Hz), 21.8. **<sup>31</sup>P NMR** (162 MHz, CDCl<sub>3</sub>):  $\delta$  = 29.4. **ATR-FTIR (cm<sup>-1</sup>):** 3312, 2960, 1736, 1365, 1069, 858, 787, 620. **HR-MS** (ESI) C<sub>18</sub>H<sub>21</sub>NO<sub>4</sub>P [M+H]<sup>+</sup>: 346.1203, found: 346.1204.

**Methyl (E)-3-(bis(4-fluorophenyl)phosphoryl)-2-(hydroxyimino)propanoate (4c)**

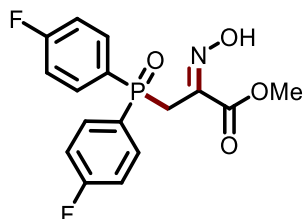

The general procedure 1 was followed using bis(4-fluorophenyl) (methylene)-15-phosphane (121 mg, 0.6 mmol), 4-nitrosomorpholine (70.0 mg, 0.6 mmol), methyl acrylate (33.6 mg, 0.2 mmol), and 2-methylpropan-2-ol (1.0 mL), and was purified by silica gel column chromatography (DCM/MeOH = 20/1) to obtain **4c** as colorless oil (54.4 mg, 78% yield). **<sup>1</sup>H NMR** (400 MHz, CDCl<sub>3</sub>):  $\delta$  = 12.80 (s, 1H), 7.90 – 7.76 (m, 4H), 7.21 – 7.11 (m, 4H), 3.89 (d,  $J$  = 14.7 Hz, 2H), 3.67 (s, 3H). **<sup>13</sup>C NMR** (101 MHz, CDCl<sub>3</sub>):  $\delta$  = 164.5 (d,  $J$  = 6.0 Hz), 164.2, 142.6, 133.9 (dd,  $J$  = 11.5, 8.9 Hz), 128.4, 116.3 (dd,  $J$  = 21.4, 13.5 Hz), 52.9, 28.9 (d,  $J$  = 66.1 Hz). **<sup>31</sup>P NMR** (162 MHz, CDCl<sub>3</sub>):  $\delta$  = 28.1. **<sup>19</sup>F NMR** (376 MHz, CDCl<sub>3</sub>):  $\delta$  = -105.9. **ATR-FTIR (cm<sup>-1</sup>):** 3205, 2956, 1826, 1148, 1052, 823, 732, 710. **HR-MS** (ESI) C<sub>18</sub>H<sub>21</sub>NO<sub>4</sub>P [M+H]<sup>+</sup>: 354.0701, found: 354.0696.

**Methyl(E)-3-(bis(3-methoxyphenyl)phosphoryl)-2-(hydroxyimino)propanoate (4d)**

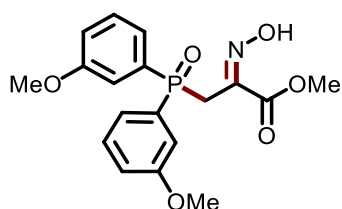

The general procedure 1 was followed using bis(3-methoxyphenyl)phosphine oxide (157 mg, 0.6 mmol), 4-nitrosomorpholine (70 mg, 0.6 mmol), methyl acrylate (17.2 mg,

0.2mmol), and 2-methylpropan-2-ol (1.0 mL), and was purified by silica gel column chromatography (DCM/MeOH = 20/1) to obtain **4d** as colorless oil (61.1 mg, 81% yield). **<sup>1</sup>H NMR** (400 MHz, CDCl<sub>3</sub>):  $\delta$  = 13.13 (s, 1H), 7.43 – 7.31 (m, 6H), 7.08 – 6.99 (m, 2H), 3.90 (d,  $J$  = 14.9 Hz, 2H), 3.77 (s, 6H), 3.61 (s, 3H). **<sup>13</sup>C NMR** (101 MHz, CDCl<sub>3</sub>):  $\delta$  = 164.4 (d,  $J$  = 2.6 Hz), 159.6 (d,  $J$  = 14.9 Hz), 142.7 (d,  $J$  = 9.7 Hz), 133.2 (d,  $J$  = 102.4 Hz), 129.8 (d,  $J$  = 14.6 Hz), 123.2 (d,  $J$  = 10.2 Hz), 118.8 (d,  $J$  = 2.7 Hz), 115.7 (d,  $J$  = 10.7 Hz), 55.6, 52.5, 28.8 (d,  $J$  = 65.1 Hz). **<sup>31</sup>P NMR** (162 MHz, CDCl<sub>3</sub>):  $\delta$  = 29.6. **ATR-FTIR (cm<sup>-1</sup>)**: 3240, 2955, 1725, 1429, 1302, 920, 774, 692. **HR-MS** (ESI) C<sub>18</sub>H<sub>21</sub>NO<sub>6</sub>P [M+H]<sup>+</sup>: 378.1101, found: 378.1105.

**Methyl (E)-3-(bis(3,5-dimethylphenyl)phosphoryl)-2-(hydroxyimino)propanoate (4e)**

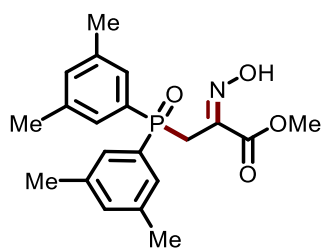

The general procedure 1 was followed using bis(3,5-dimethylphenyl)phosphine oxide (150 mg, 0.6 mmol), 4-nitrosomorpholine (70.0 mg, 0.6 mmol), methyl acrylate (17.2 mg, 0.2 mmol), and 2-methylpropan-2-ol (1.0 mL), and was purified by silica gel column chromatography (DCM/MeOH = 20/1) to obtain **4e** as colorless oil (59.0 mg, 79% yield) **<sup>1</sup>H NMR** (400 MHz, CDCl<sub>3</sub>):  $\delta$  = 12.78 (s, 1H), 7.42 (d,  $J$  = 12.4 Hz, 4H), 7.12 (s, 2H), 3.90 – 3.86 (m, 4H), 3.61 – 3.60 (m, 3H), 2.32 (d,  $J$  = 3.3 Hz, 12H). **<sup>13</sup>C NMR** (101 MHz, CDCl<sub>3</sub>):  $\delta$  = 164.7, 143.1 (d,  $J$  = 9.3 Hz), 138.3 (d,  $J$  = 12.9 Hz), 133.9 (d,  $J$  = 3.0 Hz), 132.1 (d,  $J$  = 102.0 Hz), 128.8 (d,  $J$  = 9.8 Hz), 52.4, 28.8 (d,  $J$  = 64.1 Hz), 21.4. **<sup>31</sup>P NMR** (162 MHz, CDCl<sub>3</sub>)  $\delta$  = 29.4. **ATR-FTIR (cm<sup>-1</sup>)**: 3023, 2838, 1740, 1366, 1225, 991, 875, 597. **HR-MS** (ESI) C<sub>20</sub>H<sub>25</sub>NO<sub>4</sub>P [M+H]<sup>+</sup>: 374.1516, found: 374.1513.

**Methyl (E)-3-(di-*o*-tolylphosphoryl)-2-(hydroxyimino)propanoate (4f)**

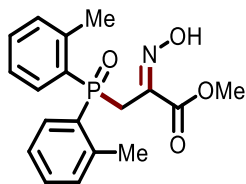

The general procedure 1 was followed using di-*o*-tolylphosphine oxide (138 mg, 0.6 mmol), 4-nitrosomorpholine (70.0 mg, 0.6 mmol), methyl acrylate (17.2 mg, 0.2 mmol), and 2-methylpropan-2-ol (1.0 mL), and was purified by silica gel column chromatography (DCM/MeOH = 20/1) to obtain **4f** as colorless oil (53.1 mg, 77% yield). **<sup>1</sup>H NMR** (400 MHz, CDCl<sub>3</sub>):  $\delta$  = 12.89 (s, 1H), 7.89 – 7.84 (m, 2H), 7.43 – 7.39 (m, 2H), 7.32 – 7.25 (m, 2H), 7.21 – 7.14 (m, 2H), 4.06 (d,  $J$  = 14.4 Hz, 2H), 3.47 (s, 3H), 2.23 (s, 6H). **<sup>13</sup>C NMR** (101 MHz, CDCl<sub>3</sub>):  $\delta$  = 164.3 (d,  $J$  = 2.2 Hz), 142.4 (d,  $J$  = 8.8 Hz), 141.9 (d,  $J$  = 9.3 Hz), 132.3, 132.2 (d,  $J$  = 9.0 Hz), 131.8 (d,  $J$  = 11.0 Hz), 130.8 (d,  $J$  = 100.3 Hz), 125.9 (d,  $J$  = 12.2 Hz), 52.5, 26.8 (d,  $J$  = 65.4 Hz), 21.5 (d,  $J$  = 4.5 Hz). **<sup>31</sup>P NMR** (162 MHz, CDCl<sub>3</sub>):  $\delta$  = 29.3. **ATR-FTIR (cm<sup>-1</sup>)**: 3459, 2790, 1776, 1435, 1295, 1123, 894, 797. **HR-MS** (ESI) C<sub>18</sub>H<sub>21</sub>NO<sub>4</sub>P [M+H]<sup>+</sup>: 346.1203, found: 346.1198.

**Methyl (E)-3-(di(naphthalen-2-yl)phosphoryl)-2-(hydroxyimino)propanoate (4g)**

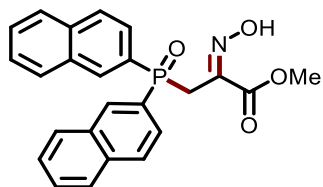

The general procedure 1 was followed using di(naphthalen-2-yl)phosphine oxide (181 mg, 0.6 mmol), 4-nitrosomorpholine (70.0 mg, 0.6 mmol), methyl acrylate (17.2 mg, 0.2 mmol), and 2-methylpropan-2-ol (1.0 mL), and was purified by silica gel column chromatography (DCM/MeOH = 20/1) to obtain **4g** as colorless oil (58.4 mg, 70% yield). **<sup>1</sup>H NMR** (400 MHz, CDCl<sub>3</sub>):  $\delta$  = 13.18 (s, 1H), 8.51 (d,  $J$  = 13.9 Hz, 2H), 7.94 – 7.85 (m, 6H), 7.82 (d,  $J$  = 10.2 Hz, 2H), 7.64 – 7.45 (m, 4H), 4.14 (d,  $J$  = 14.6 Hz, 2H), 3.49 (s, 3H). **<sup>13</sup>C NMR** (101 MHz, CDCl<sub>3</sub>):  $\delta$  = 164.5 (d,  $J$  = 2.6 Hz), 142.7 (d,  $J$  = 9.9 Hz), 134.8 (d,  $J$  = 2.5 Hz), 133.4 (d,  $J$  = 9.0 Hz), 132.5 (d,  $J$  = 13.2 Hz), 129.2, 129.1 (d,  $J$  = 103.6 Hz), 128.5, 128.3 (d,  $J$  = 5.8 Hz), 127.8, 126.9, 125.9 (d,  $J$  = 11.1 Hz), 52.4, 28.6

(d,  $J = 64.8$  Hz).  $^{31}\text{P}$  NMR (162 MHz,  $\text{CDCl}_3$ )  $\delta = 29.4$ . ATR-FTIR ( $\text{cm}^{-1}$ ): 3302, 2947, 1961, 1864, 1567, 1221, 1055, 940. HR-MS (ESI)  $\text{C}_{24}\text{H}_{21}\text{NO}_4\text{P}[\text{M}+\text{H}]^+$ : 418.1203, found: 418.1205.

#### Ethyl (E)-3-(diphenylphosphoryl)-2-(hydroxyimino)propanoate (**4h**)<sup>1</sup>

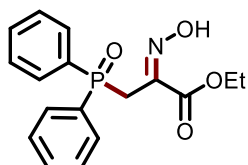

The general procedure 1 was followed using diphenylphosphine oxide (121 mg, 0.6 mmol), 4-nitrosomorpholine (70.0 mg, 0.6 mmol), ethyl acrylate (20.0 mg, 0.2 mmol), and 2-methylpropan-2-ol (1.0 mL), and was purified by silica gel column chromatography (DCM/MeOH = 20/1) to obtain **4h** as colorless oil (53.6 mg, 81% yield).  $^1\text{H}$  NMR (400 MHz,  $\text{CDCl}_3$ ):  $\delta = 13.07$  (s, 1H), 7.86 – 7.81 (m, 4H), 7.53 – 7.5 (m, 2H), 7.45 – 7.42 (m, 4H), 4.08 – 4.03 (m, 2H), 3.93 (d,  $J = 14.9$  Hz, 2H), 1.14 (t,  $J = 7.1$  Hz, 3H).  $^{13}\text{C}$  NMR (101 MHz,  $\text{CDCl}_3$ ):  $\delta = 164.0$  (d,  $J = 2.6$  Hz), 142.8 (d,  $J = 9.7$  Hz), 132.0 (d,  $J = 102.8$  Hz), 132.2 (d,  $J = 2.8$  Hz), 131.3 (d,  $J = 9.9$  Hz), 128.6 (d,  $J = 12.4$  Hz), 61.7, 28.7 (d,  $J = 64.9$  Hz), 14.2.  $^{31}\text{P}$  NMR (162 MHz,  $\text{CDCl}_3$ ):  $\delta = 29.3$ . ATR-FTIR ( $\text{cm}^{-1}$ ): 3044, 2979, 1661, 1535, 1371, 1298, 1002, 898. HR-MS (ESI)  $\text{C}_{17}\text{H}_{19}\text{NO}_4\text{P}[\text{M}+\text{H}]^+$ : 332.1046, found: 332.1047.

#### Tert-butyl (E)-3-(diphenylphosphoryl)-2-(hydroxyimino)propanoate (**4i**)

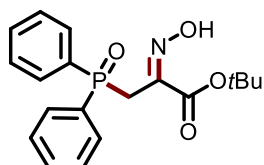

The general procedure 1 was followed using diphenylphosphine oxide (121.0 mg, 0.6 mmol), 4-nitrosomorpholine (70.0 mg, 0.6 mmol), tert-butyl acrylate (25.6 mg, 0.2 mmol), and 2-methylpropan-2-ol (1.0 mL), and was purified by silica gel column chromatography (DCM/MeOH = 20/1) to obtain **4i** as colorless oil (55.3 mg, 77% yield).  $^1\text{H}$  NMR (400 MHz,  $\text{CDCl}_3$ ):  $\delta = 11.88$  (s, 1H), 7.85 (m, 4H), 7.60 – 7.38 (m, 6H), 3.91 (d,  $J = 15.2$  Hz, 2H), 1.35 (s, 9H).  $^{13}\text{C}$  NMR (101 MHz,  $\text{CDCl}_3$ ):  $\delta = 162.8$  (d,  $J =$



2.2 Hz), 144.6 (d,  $J = 10.8$  Hz), 132.3 (d,  $J = 102.4$  Hz), 132.1 (d,  $J = 2.9$  Hz), 131.4 (d,  $J = 9.8$  Hz), 128.7 (d,  $J = 12.3$  Hz), 82.5, 28.8 (d,  $J = 64.7$  Hz), 28.0.  $^{31}\text{P}$  NMR (162 MHz,  $\text{CDCl}_3$ )  $\delta = 28.7$ . ATR-FTIR ( $\text{cm}^{-1}$ ): 3268, 2997, 1936, 1568, 1414, 1274, 998, 731. HR-MS (ESI)  $\text{C}_{19}\text{H}_{23}\text{NO}_4\text{P}$   $[\text{M}+\text{H}]^+$ : 360.1359, found: 360.1359.

#### Isobutyl (E)-3-(diphenylphosphoryl)-2-(hydroxyimino)propanoate (4j)

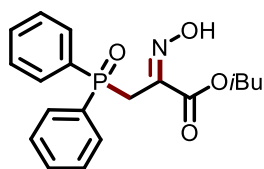

The general procedure 1 was followed using diphenylphosphine oxide (157.0 mg, 0.6 mmol), 4-nitrosomorpholine (70.0 mg, 0.6 mmol), isobutyl acrylate (17.2 mg, 0.2 mmol), and 2-methylpropan-2-ol (1.0 mL), and was purified by silica gel column chromatography (DCM/MeOH = 20/1) to obtain **4j** as colorless oil (60.3 mg, 84% yield).  $^1\text{H}$  NMR (400 MHz,  $\text{CDCl}_3$ ):  $\delta = 12.92$  (s, 1H), 7.87 - 7.82 (m, 4H), 7.54 - 7.50 (m, 2H), 7.48 - 7.42 (m, 4H), 3.94 (d,  $J = 15.0$  Hz, 2H), 3.80-3.78 (m, 2H), 1.94 - 1.74 (m, 1H), 0.83 (d,  $J = 6.7$  Hz, 6H).  $^{13}\text{C}$  NMR (101 MHz,  $\text{CDCl}_3$ ):  $\delta = 164.1$  (d,  $J = 2.6$  Hz), 142.9 (d,  $J = 9.7$  Hz), 132.2 (d,  $J = 2.8$  Hz), 132.1 (d,  $J = 102.9$  Hz), 131.3 (d,  $J = 9.9$  Hz), 128.7 (d,  $J = 12.4$  Hz), 71.7, 28.9 (d,  $J = 64.7$  Hz), 27.7, 19.2.  $^{31}\text{P}$  NMR (162 MHz,  $\text{CDCl}_3$ ):  $\delta = 29.2$ . ATR-FTIR ( $\text{cm}^{-1}$ ): 3125, 2955, 1947, 1661, 1465, 1375, 829, 772. HR-MS (ESI)  $\text{C}_{19}\text{H}_{23}\text{NO}_4\text{P}$   $[\text{M}+\text{H}]^+$ : 360.1359, found: 360.1360.

#### Cyclohexyl (E)-3-(diphenylphosphoryl)-2-(hydroxyimino)propanoate (4k)

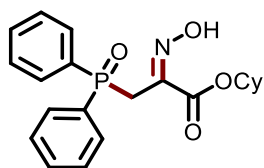

The general procedure 1 was followed using diphenylphosphine oxide (121.0 mg, 0.6 mmol), 4-nitrosomorpholine (70.0 mg, 0.6 mmol), cyclohexyl acrylate (30.8 mg, 0.2mmol), and 2-methylpropan-2-ol (1.0 mL), and was purified by silica gel column chromatography (DCM/MeOH = 20/1) to obtain **4k** as colorless oil (61.7 mg, 80% yield).  $^1\text{H}$  NMR (400 MHz,  $\text{CDCl}_3$ ):  $\delta = 12.30$  (s, 1H), 7.87-7.82 (m, 4H), 7.56 - 7.50

(m, 2H), 7.48 – 7.43 (m, 4H), 4.68 – 4.64 (m, 1H), 3.95 – 3.92 (m, 2H), 1.80 (s, 2H), 1.77 – 1.63 (m, 4H), 1.42 – 1.25 (m, 4H).  $^{13}\text{C}$  NMR (101 MHz,  $\text{CDCl}_3$ ):  $\delta$  = 163.4, 143.6, 132.19 (d,  $J$  = 2.8 Hz), 132.22 (d,  $J$  = 102.1 Hz), 131.4 (d,  $J$  = 9.9 Hz), 128.7 (d,  $J$  = 12.4 Hz), 74.8, 31.5, 29.0 (d,  $J$  = 64.9 Hz), 25.4, 24.0.  $^{31}\text{P}$  NMR (162 MHz,  $\text{CDCl}_3$ ):  $\delta$  = 29.1. ATR-FTIR ( $\text{cm}^{-1}$ ): 3300, 2871, 1756, 1472, 1311, 994, 857, 772. HR-MS (ESI)  $\text{C}_{21}\text{H}_{25}\text{NO}_4\text{P}$   $[\text{M}+\text{H}]^+$ : 386.1516, found:386.1519.

**Benzyl (E)-3-(diphenylphosphoryl)-2-(hydroxyimino)propanoate (4l)**

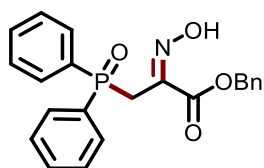

The general procedure 1 was followed using diphenylphosphine oxide (121.0 mg, 0.6 mmol), 4-nitrosomorpholine (70.0 mg, 0.6 mmol), benzyl acrylate(32.4 mg, 0.2 mmol), and 2-methylpropan-2-ol (1.0 mL), and was purified by silica gel column chromatography ( $\text{DCM}/\text{MeOH}$  = 20/1) to obtain **4l** as colorless oil (56.6 mg, 72% yield).

$^1\text{H}$  NMR (400 MHz,  $\text{CDCl}_3$ ):  $\delta$  = 12.95 (s, 1H), 7.88 – 7.75 (m, 4H), 7.49 – 7.45 (m, Hz, 2H), 7.38 – 7.34 (m, 4H), 7.33 – 7.26 (m, 5H), 5.06 (s, 2H), 3.93 (d,  $J$  = 14.8 Hz, 2H).  $^{13}\text{C}$  NMR (101 MHz,  $\text{CDCl}_3$ ):  $\delta$  = 163.8 (d,  $J$  = 2.6 Hz), 142.6 (d,  $J$  = 9.8 Hz), 135.5, 132.0 (d,  $J$  = 2.8 Hz), 131.9 (d,  $J$  = 103.1 Hz), 131.2 (d,  $J$  = 10.0 Hz), 128.6, 128.5 (d,  $J$  = 3.9 Hz), 128.3, 128.2, 67.11, 28.77 (d,  $J$  = 64.7 Hz).  $^{31}\text{P}$  NMR (162 MHz,  $\text{CDCl}_3$ ):  $\delta$  = 29.2. ATR-FTIR ( $\text{cm}^{-1}$ ): 3256, 2842, 1792, 1398, 1205, 874, 769, 704. HR-MS (ESI)  $\text{C}_{22}\text{H}_{21}\text{NO}_4\text{P}$   $[\text{M}+\text{H}]^+$ : 394.1203, found: 394.1197.

**2,2,2-Trifluoroethyl (E)-3-(diphenylphosphoryl)-2-(hydroxyimino)propanoate (4m)**

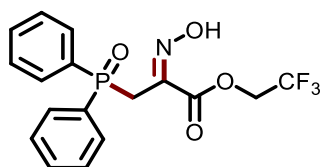

The general procedure 1 was followed using diphenylphosphine oxide (121.0 mg, 0.6 mmol), 4-nitrosomorpholine (70.0 mg, 0.6 mmol), 2,2,2-trifluoroethyl acrylate (31.0

mg, 0.2 mmol), and 2-methylpropan-2-ol (1.0 mL), and was purified by silica gel column chromatography (DCM/MeOH = 20/1) to obtain **4m** as colorless oil (56.2 mg, 73% yield). **<sup>1</sup>H NMR** (400 MHz, CDCl<sub>3</sub>): δ = 13.53 (s, 1H), 7.89 – 7.77 (m, 4H), 7.58 – 7.53 (m, 2H), 7.50 – 7.45 (m, 4H), 4.40 – 4.34 (m, 2H), 3.94 (d, *J* = 14.5 Hz, 2H). **<sup>13</sup>C NMR** (101 MHz, CDCl<sub>3</sub>): δ = 162.7 (d, *J* = 2.6 Hz), 141.3 (d, *J* = 9.8 Hz), 132.5 (d, *J* = 2.9 Hz), 131.6 (d, *J* = 103.5 Hz), 131.3 (d, *J* = 9.9 Hz), 128.8 (d, *J* = 12.3 Hz), 122.8 (d, *J* = 277.5 Hz), 61.0 (q, *J* = 36.9 Hz), 28.8 (d, *J* = 64.4 Hz). **<sup>19</sup>F NMR** (376 MHz, CDCl<sub>3</sub>): δ = -73.3. **<sup>31</sup>P NMR** (162 MHz, CDCl<sub>3</sub>): δ = 29.4. **ATR-FTIR (cm<sup>-1</sup>):** 3295, 2875, 1927, 1442, 1367, 1109, 962, 812. **HR-MS** (ESI) C<sub>17</sub>H<sub>16</sub>F<sub>3</sub>NO<sub>4</sub>P [M+H]<sup>+</sup>: 386.0764, found: 386.0760.

#### 2-hydroxyethyl (E)-3-(diphenylphosphoryl)-2-(hydroxyimino)propanoate (**4n**)

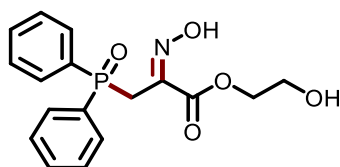

The general procedure 1 was followed using diphenylphosphine oxide (121.0 mg, 0.6 mmol), 4-nitrosomorpholine (70.0 mg, 0.6 mmol), 2-hydroxyethyl acrylate (23.1 mg, 0.2 mmol), and 2-methylpropan-2-ol (1.0 mL), and was purified by silica gel column chromatography (DCM/MeOH = 10/1) to obtain **4n** as colorless oil (49.3 mg, 71% yield). **<sup>1</sup>H NMR** (400 MHz, CDCl<sub>3</sub>): δ = 12.43 (s, 1H), 7.84 – 7.70 (m, 4H), 7.49 – 7.42 (m, 2H), 7.39 – 7.37 (m, 4H), 5.36 (s, 1H), 4.27 – 4.11 (m, 2H), 3.88 (d, *J* = 14.9 Hz, 2H), 3.76 – 3.59 (m, 2H). **<sup>13</sup>C NMR** (101 MHz, CDCl<sub>3</sub>): δ = 162.9, 143.6 (d, *J* = 9.3 Hz), 132.4 (d, *J* = 2.8 Hz), 131.6 (d, *J* = 102.9 Hz), 128.7 (d, *J* = 12.2 Hz), 67.7, 60.1, 28.5 (d, *J* = 64.6 Hz). **<sup>31</sup>P NMR** (162 MHz, CDCl<sub>3</sub>): δ = 30.1. **ATR-FTIR (cm<sup>-1</sup>):** 3359, 2996, 2362, 1865, 1312, 1247, 1129, 883. **HR-MS** (ESI) C<sub>17</sub>H<sub>19</sub>NO<sub>5</sub>P [M+H]<sup>+</sup>: 348.0995, found: 348.0992.

#### 2-chloroethyl (E)-3-(diphenylphosphoryl)-2-(hydroxyimino)propanoate (**4o**)

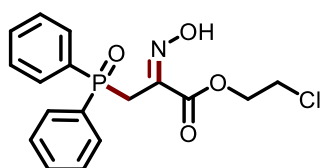

The general procedure 1 was followed using diphenylphosphine oxide (121.0 mg, 0.6 mmol), 4-nitrosomorpholine (70.0 mg, 0.6 mmol), 2-chloroethyl acrylate (26.8 mg, 0.2 mmol), and 2-methylpropan-2-ol (1.0 mL), and was purified by silica gel column chromatography (DCM/MeOH = 20/1) to obtain **4o** as colorless oil (43.8 mg, 60% yield). **<sup>1</sup>H NMR** (400 MHz, CDCl<sub>3</sub>): δ = 13.13 (s, 1H), 7.87 – 7.81 (m, 4H), 7.54 – 7.51 (m, 2H), 7.49 – 7.44 (m, 4H), 4.24 (t, *J* = 6.1 Hz, 2H), 3.93 (d, *J* = 14.7 Hz, 2H), 3.51 (t, *J* = 6.2 Hz, 2H). **<sup>13</sup>C NMR** (101 MHz, CDCl<sub>3</sub>): δ = 163.3, 142.2 (d, *J* = 9.8 Hz), 132.3, 132.1 (d, *J* = 3.0 Hz), 131.2 (d, *J* = 9.7 Hz), 128.6 (d, *J* = 12.3 Hz), 64.7, 40.7, 28.6 (d, *J* = 64.6 Hz). **<sup>31</sup>P NMR** (162 MHz, CDCl<sub>3</sub>): δ = 29.1. **ATR-FTIR (cm<sup>-1</sup>):** 3023, 2901, 1973, 1882, 1569, 1241, 956, 872. **HR-MS** (ESI) C<sub>17</sub>H<sub>17</sub>ClNO<sub>4</sub>P [M+H]<sup>+</sup>: 366.0656, found:366.0656.

**2-Bromoethyl (E)-2-(diphenylphosphoryl)-3-(hydroxyimino)propanoate (4p)**

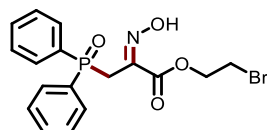

The general procedure 1 was followed using diphenylphosphine oxide (121.0 mg, 0.6 mmol), 4-nitrosomorpholine (70.0 mg, 0.6 mmol), 2-bromoethyl acrylate (35.6 mg, 0.2 mmol), and 2-methylpropan-2-ol (1.0 mL), and was purified by silica gel column chromatography (DCM/MeOH = 20/1) to obtain **4p** as colorless oil (59.9 mg, 73% yield). **<sup>1</sup>H NMR** (400 MHz, CDCl<sub>3</sub>): δ = 13.22 (s, 1H), 7.86 – 7.80 (m, 4H), 7.56 – 7.51 (m, 2H), 7.49 – 7.44 (m, 4H), 4.27 (t, *J* = 6.7 Hz, 2H), 3.93 (d, *J* = 14.7 Hz, 2H), 3.31 (t, *J* = 6.7 Hz, 2H). **<sup>13</sup>C NMR** (101 MHz, CDCl<sub>3</sub>): δ = 163.3 (d, *J* = 2.5 Hz), 142.3 (d, *J* = 9.8 Hz), 132.3 (d, *J* = 2.8 Hz), 131.8 (d, *J* = 103.2 Hz), 131.3 (d, *J* = 9.8 Hz), 128.7 (d, *J* = 12.3 Hz), 64.7, 28.7 (d, *J* = 64.6 Hz), 27.9. **<sup>31</sup>P NMR** (162 MHz, CDCl<sub>3</sub>): δ = 29.4. **ATR-FTIR (cm<sup>-1</sup>):** 3248, 2796, 1922, 1658, 1561, 1347, 1207, 991. **HR-MS** (ESI) C<sub>16</sub>H<sub>16</sub>BrNO<sub>4</sub>P [M+H]<sup>+</sup>: 410.0151, found: 410.0153.

**Diethyl (Z)-2-(diphenylphosphoryl)-1-(hydroxyimino)ethylphosphonate (4q)**

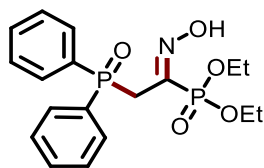

The general procedure 1 was followed using diphenylphosphine oxide (157.0 mg, 0.6 mmol), 4-nitrosomorpholine (70.0 mg, 0.6 mmol), diethyl vinylphosphonate (32.8 mg, 0.2 mmol), and 2-methylpropan-2-ol (1.0 mL), and was purified by silica gel column chromatography (DCM/MeOH = 20/1) to obtain **4q** as colorless oil (59.3 mg, 75% yield). **<sup>1</sup>H NMR** (400 MHz, CDCl<sub>3</sub>):  $\delta$  = 13.14 (s, 1H), 7.93 – 7.81 (m, 4H), 7.57 – 7.49 (m, 2H), 7.49 – 7.41 (m, 4H), 4.06 – 3.88 (m, 4H), 3.85 – 3.79 (m, 2H), 1.19 – 1.15 (m, 6H). **<sup>13</sup>C NMR** (101 MHz, CDCl<sub>3</sub>):  $\delta$  = 144.7 (d,  $J$  = 10.6 Hz), 142.5 (d,  $J$  = 10.3 Hz), 132.9 (d,  $J$  = 103.1 Hz), 132.1 (d,  $J$  = 2.8 Hz), 131.3 (d,  $J$  = 9.9 Hz), 128.7 (d,  $J$  = 12.2 Hz), 63.3 (d,  $J$  = 6.1 Hz), 30.2 (dd,  $J$  = 63.9, 18.3 Hz), 16.2 (d,  $J$  = 6.5 Hz). **<sup>31</sup>P NMR** (162 MHz, CDCl<sub>3</sub>)  $\delta$  = 28.7, 9.2. **ATR-FTIR (cm<sup>-1</sup>)**: 3062, 2991, 2364, 1584, 1336, 1270, 774, 720. **HR-MS** (ESI) C<sub>18</sub>H<sub>24</sub>NO<sub>5</sub>P<sub>2</sub> [M+H]<sup>+</sup>: 396.1124, found: 396.1133.

**(E)-2-(2-(hydroxyimino)-2-(perfluorophenyl)ethyl)diphenylphosphine oxide (4r)**

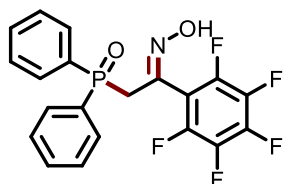

The general procedure 1 was followed using diphenylphosphine oxide (121.0 mg, 0.6 mmol), 4-nitrosomorpholine (70.0 mg, 0.6 mmol), 1,2,3,4,5-pentafluoro-6-vinylbenzene (39.0 mg, 0.2 mmol), and 2-methylpropan-2-ol (1.0 mL), and was purified by silica gel column chromatography (DCM/MeOH = 20/1) to obtain **4r** as colorless oil (58.7 mg, 69% yield). **<sup>1</sup>H NMR** (400 MHz, CDCl<sub>3</sub>):  $\delta$  = 11.28 (s, 1H), 7.77 – 7.68 (m, 4H), 7.54 – 7.45 (m, 2H), 7.42 – 7.37 (m, 4H), 4.00 (d,  $J$  = 14.3 Hz, 2H). **<sup>13</sup>C NMR** (101 MHz, CDCl<sub>3</sub>):  $\delta$  = 171.5, 138.8, 132.4 (d,  $J$  = 2.7 Hz), 131.6 (d,  $J$  = 102.3 Hz), 131.0 (d,  $J$  = 9.8 Hz), 128.7 (d,  $J$  = 12.3 Hz), 31.0 (d,  $J$  = 65.3 Hz). **<sup>19</sup>F NMR** (376 MHz, CDCl<sub>3</sub>)  $\delta$  = -139.9, -148.0, -160.0. **<sup>31</sup>P NMR** (162 MHz, CDCl<sub>3</sub>):  $\delta$

= 28.0. **ATR-FTIR** ( $\text{cm}^{-1}$ ): 3069, 2900, 1892, 1311, 1255, 874, 796, 710. **HR-MS** (ESI)  $\text{C}_{20}\text{H}_{14}\text{F}_5\text{NO}_2\text{P}[\text{M}+\text{H}]^+$ : 426.0677, found: 426.0679.

### Methyl (E)-2-(hydroxyimino)-3-(phenylsulfonyl)propanoate (**6a**)

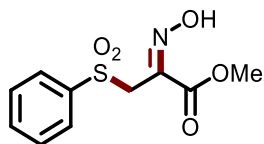

The general procedure 2 was followed using sodium benzenesulfinate (150.0 mg, 0.6 mmol), tert-butyl nitrite (165.0 mg, 1.6 mmol), methyl acrylate (17.2 mg, 0.2 mmol), and 2-methylpropan-2-ol (0.5 mL), and was purified by silica gel column chromatography (PE/EtOAc = 2/1) to obtain **6a** as colorless oil (41.2 mg, 80% yield).  **$^1\text{H}$  NMR** (400 MHz,  $\text{CDCl}_3$ ):  $\delta$  = 10.01 (s, 1H), 7.93 – 7.87 (m, 2H), 7.67 – 7.63 (m, 1H), 7.56 – 7.53 (m, 2H), 4.59 (s, 2H), 3.75 (s, 3H).  **$^{13}\text{C}$  NMR** (101 MHz,  $\text{CDCl}_3$ ):  $\delta$  = 162.6, 141.3, 139.5, 134.3, 129.3, 128.4, 53.3, 51.5. **ATR-FTIR** ( $\text{cm}^{-1}$ ): 3331, 2279, 1864, 1556, 1355, 1137, 1005, 887. **HR-MS** (ESI)  $\text{C}_{10}\text{H}_{12}\text{NO}_5\text{S} [\text{M}+\text{H}]^+$ : 258.0431, found: 258.0431.

### Methyl (E)-2-(hydroxyimino)-3-tosylpropanoate (**6b**)<sup>2</sup>

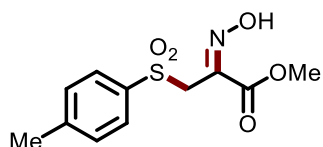

The general procedure 2 was followed using S-phenyl 4-methylbenzenesulfonothioate (159.0 mg, 0.6 mmol), tert-butyl nitrite (165.0 mg, 1.6 mmol), methyl acrylate (17.2 mg, 0.2 mmol), and 2-methylpropan-2-ol (0.5 mL), and was purified by silica gel column chromatography (PE/EtOAc = 2/1) to obtain **6b** as colorless oil (45.0 mg, 83% yield).  **$^1\text{H}$  NMR** (400 MHz,  $\text{CDCl}_3$ ):  $\delta$  = 7.78 (d,  $J$  = 8.4 Hz, 2H), 7.34 (d,  $J$  = 8.1 Hz, 2H), 4.58 (s, 2H), 3.77 (t,  $J$  = 1.0 Hz, 3H), 2.44 (s, 3H).  **$^{13}\text{C}$  NMR** (101 MHz,  $\text{CDCl}_3$ ):  $\delta$  = 162.7, 145.4, 141.7, 136.7, 130.0, 128.5, 53.3, 51.6, 21.8. **ATR-FTIR** ( $\text{cm}^{-1}$ ): 3225, 2980, 1782, 1641, 1355, 1027, 997, 812. **HR-MS** (ESI)  $\text{C}_{11}\text{H}_{14}\text{NO}_5\text{S} [\text{M}+\text{H}]^+$ : 272.0587, found: 272.0585.

### Methyl (E)-3-((4-fluorophenyl)sulfonyl)-2-(hydroxyimino)propanoate (**6c**)

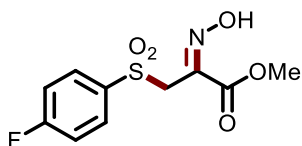

The general procedure 2 was followed using S-phenyl 4-fluorobenzenesulfonylthioate (160.8 mg, 0.6 mmol), tert-butyl nitrite (165.0 mg, 1.6 mmol), methyl acrylate (17.2 mg, 0.2 mmol), and 2-methylpropan-2-ol (0.5 mL), and was purified by silica gel column chromatography (PE/EtOAc = 2/1) to obtain **6c** as colorless oil (45.1 mg, 82% yield). **<sup>1</sup>H NMR** (400 MHz, CDCl<sub>3</sub>):  $\delta$  = 8.04 – 7.76 (m, 2H), 7.25 – 7.19 (m, 2H), 4.59 (s, 2H), 3.79 (d, *J* = 0.9 Hz, 3H). **<sup>13</sup>C NMR** (101 MHz, CDCl<sub>3</sub>):  $\delta$  = 166.3 (d, *J* = 257.1 Hz), 162.7, 141.4, 135.6 (d, *J* = 3.0 Hz), 131.5 (d, *J* = 9.8 Hz), 116.7 (d, *J* = 22.8 Hz), 53.5, 51.7. **<sup>19</sup>F NMR** (376 MHz, CDCl<sub>3</sub>):  $\delta$  = -102.6. **ATR-FTIR (cm<sup>-1</sup>):** 3307, 2957, 1980, 1755, 1623, 1447, 1057, 847. **HR-MS** (ESI) C<sub>10</sub>H<sub>11</sub>FNO<sub>5</sub>S [M+H]<sup>+</sup>: 276.0336, found: 276.0337.

#### Methyl (E)-3-((4-chlorophenyl)sulfonyl)-2-(hydroxyimino)propanoate (**6d**)

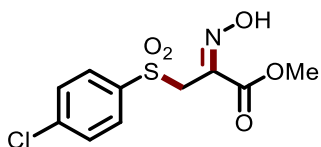

The general procedure 2 was followed using S-phenyl 4-chlorobenzenesulfonylthioate (171.0mg, 0.6 mmol), tert-butyl nitrite (165.0 mg, 1.6 mmol), methyl acrylate (17.2 mg, 0.2 mmol), and 2-methylpropan-2-ol (0.5 mL), and was purified by silica gel column chromatography (PE/EtOAc = 2/1) to obtain **6d** as colorless oil (47.1 mg, 81% yield) **<sup>1</sup>H NMR** (400 MHz, CDCl<sub>3</sub>):  $\delta$  = 9.47 (s, 1H), 7.84 (d, *J* = 8.7 Hz, 2H), 7.53 (d, *J* = 8.7 Hz, 2H), 4.60 (s, 2H), 3.82 (s, 3H). **<sup>13</sup>C NMR** (101 MHz, CDCl<sub>3</sub>):  $\delta$  = 162.4, 141.5, 141.0, 137.9, 129.9, 129.5, 53.4, 51.4. **ATR-FTIR (cm<sup>-1</sup>):** 3047, 2767, 1929, 1623, 1544, 1277, 1002, 774. **HR-MS** (ESI) C<sub>10</sub>H<sub>11</sub>ClNO<sub>5</sub>S [M+H]<sup>+</sup>: 292.0041, found: 292.0041.

#### Ethyl (E)-2-(hydroxyimino)-3-(phenylsulfonyl)propanoate (**6e**)

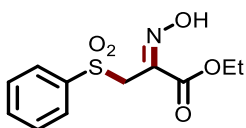

The general procedure 2 was followed using S-phenyl benzenesulfonothioate (150.0 mg, 0.6 mmol), tert-butyl nitrite (165.0 mg, 1.6 mmol), ethyl acrylate (20 mg, 0.2 mmol), and 2-methylpropan-2-ol (0.5 mL), and was purified by silica gel column chromatography (PE/EtOAc = 2/1) to obtain **6e** as colorless oil (42.3 mg, 78% yield). **<sup>1</sup>H NMR** (400 MHz, CDCl<sub>3</sub>): δ = 10.05 (s, 1H), 7.93 – 7.91 (m, 2H), 7.68 – 7.65 (m, 1H), 7.58 – 7.54 (m, 2H), 4.61 (s, 2H), 4.25 – 4.20 (m, 2H), 1.30 – 1.27 (m, 3H). **<sup>13</sup>C NMR** (101 MHz, CDCl<sub>3</sub>): δ = 162.1, 141.6, 139.6, 134.2, 129.3, 128.5, 62.8, 51.5, 14.1. **ATR-FTIR** (cm<sup>-1</sup>): 3185, 2462, 1980, 1773, 1596, 1244, 1129, 990. **HR-MS** (ESI) C<sub>11</sub>H<sub>14</sub>NO<sub>5</sub>S [M+H]<sup>+</sup>: 272.0587, found: 272.0590.

#### Cyclohexyl (E)-2-(hydroxyimino)-3-(phenylsulfonyl)propanoate (**6f**)

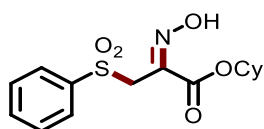

The general procedure 2 was followed using sodium benzenesulfinate (150.0 mg, 0.6 mmol), tert-butyl nitrite (165.0 mg, 1.6 mmol), cyclohexyl acrylate (30.8 mg, 0.2 mmol), and 2-methylpropan-2-ol (0.5 mL), and was purified by silica gel column chromatography (PE/EtOAc = 5/1) to obtain **6f** as colorless oil (52.0 mg, 80% yield). **<sup>1</sup>H NMR** (400 MHz, CDCl<sub>3</sub>): δ = 10.12 (s, 1H), 7.91 (d, *J* = 7.1 Hz, 2H), 7.68 – 7.64 (m, 1H), 7.59 – 7.46 (m, 2H), 4.86 – 4.80 (m, 1H), 4.60 (s, 2H), 1.87 – 1.73 (m, 4H), 1.58 – 1.22 (m, 6H). **<sup>13</sup>C NMR** (101 MHz, CDCl<sub>3</sub>): δ = 161.5, 141.8, 139.7, 134.2, 129.4, 128.5, 75.8, 51.6, 31.4, 25.3, 23.8. **ATR-FTIR** (cm<sup>-1</sup>): 3205, 2847, 1772, 1651, 1549, 1263, 1180, 921. **HR-MS** (ESI) C<sub>15</sub>H<sub>20</sub>NO<sub>5</sub>S [M+H]<sup>+</sup>: 326.1057, found: 326.1049.

#### Tert-butyl (E)-2-(hydroxyimino)-3-(phenylsulfonyl)propanoate (**6g**)

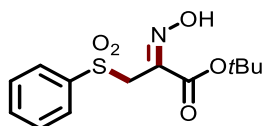

The general procedure 2 was followed using S-phenyl benzenesulfonothioate (150.0 mg, 0.6 mmol), tert-butyl nitrite (165.0 mg, 1.6 mmol), tert-butyl acrylate (25.7 mg, 0.2 mmol), and 2-methylpropan-2-ol (0.5 mL), and was purified by silica gel column chromatography (PE/EtOAc = 5/1) to obtain **6g** as colorless oil (44.9 mg, 75% yield).



**<sup>1</sup>H NMR** (400 MHz, CDCl<sub>3</sub>): δ = 9.86 (s, 1H), 7.90 (d, *J* = 8.1 Hz, 2H), 7.63 (d, *J* = 8.2 Hz, 1H), 7.56–7.52 (m, 2H), 4.56 (s, 2H), 1.50–1.28 (m, 9H). **<sup>13</sup>C NMR** (101 MHz, CDCl<sub>3</sub>): δ = 160.8, 142.3, 139.7, 134.2, 129.3, 128.5, 84.1, 51.4, 27.9. **ATR-FTIR** (cm<sup>-1</sup>): 3209, 2980, 1944, 1722, 1623, 1472, 1330, 1024. **HR-MS** (ESI) C<sub>13</sub>H<sub>18</sub>NO<sub>5</sub>S [M+H]<sup>+</sup>: 300.0900, found: 300.0908.

**Isobutyl (E)-2-(hydroxyimino)-3-(phenylsulfonyl)propanoate (6h)**

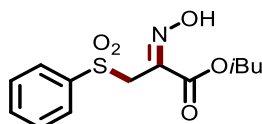

The general procedure 2 was followed using S-phenyl benzenesulfonylthioate (150.0 mg, 0.6 mmol), tert-butyl nitrite (165.0 mg, 1.6 mmol), isobutyl acrylate (25.6 mg, 0.2 mmol), and 2-methylpropan-2-ol (0.5 mL), and was purified by silica gel column chromatography (PE/EtOAc = 5/1) to obtain **6 h** as colorless oil (45.4 mg, 76% yield).

**<sup>1</sup>H NMR** (400 MHz, CDCl<sub>3</sub>): δ = 9.50 (s, 1H), 7.97 – 7.86 (m, 2H), 7.73 – 7.62 (m, 1H), 7.55 (m, 2H), 4.60 (s, 2H), 3.97 (m, 2H), 1.98 (m, 1H), 0.95 (m, 6H). **<sup>13</sup>C NMR** (101 MHz, CDCl<sub>3</sub>): δ = 162.1, 142.0, 139.5, 134.2, 129.3, 128.5, 51.6, 27.8, 19.2. **ATR-FTIR** (cm<sup>-1</sup>): 3030, 2771, 1905, 1672, 1553, 1238, 1059, 956. **HR-MS** (ESI) C<sub>13</sub>H<sub>18</sub>NO<sub>5</sub>S [M+H]<sup>+</sup>: 300.0900, found: 300.0901.

**Benzyl (E)-2-(hydroxyimino)-3-(phenylsulfonyl)propanoate (6i)**

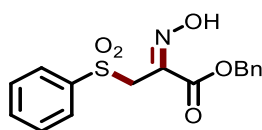

The general procedure 2 was followed using S-phenyl benzenesulfonylthioate (150.0 mg, 0.6 mmol), tert-butyl nitrite (165.0 mg, 1.6 mmol), benzyl acrylate (32.4 mg, 0.2 mmol), and 2-methylpropan-2-ol (0.5 mL), and was purified by silica gel column chromatography (PE/EtOAc = 5/1) to obtain **6 i** as colorless oil (44.9 mg, 76% yield).

**<sup>1</sup>H NMR** (400 MHz, CDCl<sub>3</sub>): δ = 7.96 – 7.80 (m, 2H), 7.65 – 7.56 (m, 1H), 7.47 (m, 2H), 7.35 (m, 5H), 5.17 (s, 2H), 4.56 (s, 2H). **<sup>13</sup>C NMR** (101 MHz, CDCl<sub>3</sub>): δ = 162.0, 141.4, 139.5, 134.8, 134.3, 129.3, 128.9, 128.8, 128.4, 68.3, 51.6. **ATR-FTIR** (cm<sup>-1</sup>): 3120, 2750, 1664, 1579, 1432, 1288, 1159, 836. **HR-MS** (ESI) C<sub>16</sub>H<sub>16</sub>NO<sub>5</sub>S [M+H]<sup>+</sup>:

334.0744, found: 334.0749.

**Phenyl (E)-2-(hydroxyimino)-3-(phenylsulfonyl)propanoate (6j)**

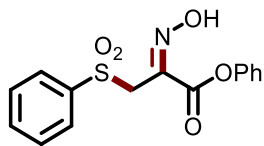

The general procedure 2 was followed using S-phenyl benzenesulfonothioate (150.0 mg, 0.6 mmol), tert-butyl nitrite (165.0 mg, 1.6 mmol), phenyl acrylate (30.0 mg, 0.2 mmol), and 2-methylpropan-2-ol (0.5 mL), and was purified by silica gel column chromatography (PE/EtOAc = 5/1) to obtain **6j** as colorless oil (43.4 mg, 68% yield).

**<sup>1</sup>H NMR** (400 MHz, CDCl<sub>3</sub>):  $\delta$  = 10.68 (s, 1H), 8.04 – 7.87 (m, 2H), 7.72 – 7.60 (m, 1H), 7.52 (m, 2H), 7.38 (m, 2H), 7.27 (m, 1H), 7.07 (m, 2H), 4.68 (m, 2H). **<sup>13</sup>C NMR** (101 MHz, CDCl<sub>3</sub>):  $\delta$  = 161.0, 150.2, 141.2, 139.3, 134.4, 129.7, 129.5, 128.4, 126.6, 121.4, 51.6. **ATR-FTIR** (cm<sup>-1</sup>): 3286, 2910, 1755, 1432, 1159, 752, 662, 574. **HR-MS** (ESI) C<sub>15</sub>H<sub>14</sub>NO<sub>5</sub>S [M+H]<sup>+</sup>: 320.0587, found: 320.0589.

**2,2,2-trifluoroethyl (E)-2-(hydroxyimino)-3-(phenylsulfonyl)propanoate (6k)**

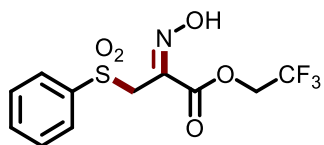

The general procedure 2 was followed using S-phenyl benzenesulfonothioate (150.0 mg, 0.6 mmol), tert-butyl nitrite (165.0 mg, 1.6 mmol), 2,2,2-trifluoroethyl acrylate (31.0 mg, 0.2 mmol), and 2-methylpropan-2-ol (0.5 mL), and was purified by silica gel column chromatography (PE/EtOAc = 5/1) to obtain **6k** as colorless oil (48.1 mg, 74% yield). **<sup>1</sup>H NMR** (400 MHz, CDCl<sub>3</sub>):  $\delta$  = 9.51 (s, 0.5H), 7.96 – 7.89 (m, 2H), 7.75 – 7.64 (m, 1H), 7.58 – 7.55 (m, 2H), 4.65 – 4.50 (m, 4H). **<sup>13</sup>C NMR** (101 MHz, CDCl<sub>3</sub>):  $\delta$  = 164.7, 143.1 (d, *J* = 9.3 Hz), 138.3 (d, *J* = 12.9 Hz), 133.9 (d, *J* = 3.0 Hz), 132.1 (d, *J* = 102.0 Hz), 128.8 (d, *J* = 9.8 Hz), 52.4, 28.8 (d, *J* = 64.1 Hz), 21.4. **<sup>19</sup>F NMR** (376 MHz, CDCl<sub>3</sub>):  $\delta$  = -73.5. **ATR-FTIR** (cm<sup>-1</sup>): 3112, 2750, 1844, 1659, 1412, 1285, 1002, 993. **HR-MS** (ESI) C<sub>11</sub>H<sub>11</sub>F<sub>3</sub>NO<sub>5</sub>S [M+H]<sup>+</sup>: 326.0305, found: 326.0311.

**2-methoxyethyl (E)-2-(hydroxyimino)-3-(phenylsulfonyl)propanoate (6l)**

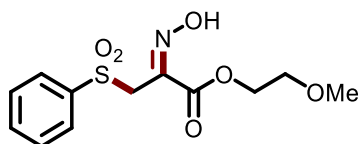

The general procedure 2 was followed using S-phenyl benzenesulfonothioate (150.0 mg, 0.6 mmol), tert-butyl nitrite (165.0 mg, 1.6 mmol), 2-methoxyethyl acrylate (26.0 mg, 0.2 mmol), and 2-methylpropan-2-ol (0.5 mL), and was purified by silica gel column chromatography (PE/EtOAc = 2/1) to obtain **6l** as colorless oil (42.8 mg, 71% yield). **<sup>1</sup>H NMR** (400 MHz, CDCl<sub>3</sub>): 10.70 (s, 1H), 7.97 – 7.85 (m, 2H), 7.67 – 7.63 (m, 1H), 7.55 (d, *J* = 8.0 Hz, 2H), 4.60 (s, 2H), 4.33 – 4.22 (m, 2H), 3.69 – 3.60 (m, 2H), 3.38 (s, 3H). **<sup>13</sup>C NMR** (101 MHz, CDCl<sub>3</sub>):  $\delta$  = 162.2, 141.1, 139.7, 134.2, 129.3, 128.4, 70.0, 65.0, 59.0, 51.5. **ATR-FTIR (cm<sup>-1</sup>)**: 3127, 2865, 1856, 1725, 1328, 1025, 997, 834. **HR-MS** (ESI) C<sub>12</sub>H<sub>16</sub>NO<sub>6</sub>S [M+H]<sup>+</sup>: 302.0693, found: 302.0687.

#### 2-Hydroxyethyl (E)-2-(hydroxyimino)-3-(phenylsulfonyl)propanoate (6m)

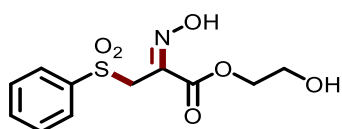

The general procedure 2 was followed using S-phenyl benzenesulfonothioate (150.0 mg, 0.6 mmol), tert-butyl nitrite (165.0 mg, 1.6 mmol), 2-hydroxyethyl acrylate (23.0 mg, 0.2 mmol), and 2-methylpropan-2-ol (0.5 mL), and was purified by silica gel column chromatography (PE/EtOAc = 5/1) to obtain **6m** as colorless oil (41.4 mg, 72% yield). **<sup>1</sup>H NMR** (400 MHz, CDCl<sub>3</sub>):  $\delta$  = 11.47 (s, 1H), 7.95 – 7.86 (m, 2H), 7.72 – 7.62 (m, 1H), 7.55 (m, 2H), 4.61 (s, 2H), 4.32 – 4.22 (m, 2H), 3.89 – 3.79 (m, 2H), 2.82 (s, 1H). **<sup>13</sup>C NMR** (101 MHz, CDCl<sub>3</sub>):  $\delta$  = 162.2, 141.1, 139.4, 134.5, 129.5, 128.3, 68.0, 60.4, 51.6. **ATR-FTIR (cm<sup>-1</sup>)**: 3302, 2986, 1977, 1754, 1528, 1322, 1154, 1026. **HR-MS** (ESI) C<sub>11</sub>H<sub>14</sub>NO<sub>6</sub>S [M+H]<sup>+</sup>: 288.0536, found: 288.0540.

#### 2-bromoethyl (E)-2-(hydroxyimino)-3-(phenylsulfonyl)propanoate (6n)

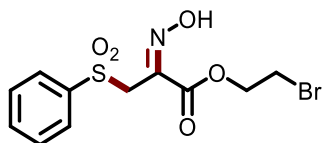

The general procedure 2 was followed using S-phenyl benzenesulfonothioate (150.0

mg, 0.6 mmol), tert-butyl nitrite (165.0 mg, 1.6 mmol), 2-bromoethyl acrylate (35.6 mg, 0.2 mmol), and 2-methylpropan-2-ol (0.5 mL), and was purified by silica gel column chromatography (PE/EtOAc = 1/1) to obtain **6n** as colorless oil (52.3 mg, 75% yield). **<sup>1</sup>H NMR** (400 MHz, CDCl<sub>3</sub>): δ = 9.88 (s, 1H), 8.09 – 7.82 (m, 2H), 7.77 – 7.63 (m, 1H), 7.57 (m, 2H), 4.61 (s, 2H), 4.48 (m, 2H), 3.52 (m, 2H). **<sup>13</sup>C NMR** (101 MHz, CDCl<sub>3</sub>): δ = 161.6, 141.4, 139.5, 134.3, 129.4, 128.5, 65.6, 51.5, 27.9. **ATR-FTIR** (cm<sup>-1</sup>): 3145, 2750, 1836, 1642, 1229, 1054, 992, 881. **HR-MS** (ESI) C<sub>11</sub>H<sub>13</sub>BrNO<sub>5</sub>S [M+H]<sup>+</sup>: 349.9692, found: 349.9692.

#### Diethyl (Z)-(1-(hydroxyimino)-2-(phenylsulfonyl)ethyl)phosphonate (**6o**)

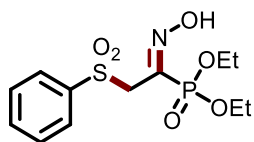

The general procedure 2 was followed using S-phenyl benzenesulfonylthioate (150.0 mg, 0.6 mmol), tert-butyl nitrite (165.0 mg, 1.6 mmol), diethyl vinylphosphonate (23.0 mg, 0.2 mmol), and 2-methylpropan-2-ol (0.5 mL), and was purified by silica gel column chromatography (PE/EtOAc = 5/1) to obtain **6o** as colorless oil (43.6 mg, 65% yield). **<sup>1</sup>H NMR** (400 MHz, CDCl<sub>3</sub>): δ = 10.94 (s, 1H), 8.02 – 7.91 (m, 2H), 7.70 – 7.60 (m, 1H), 7.54 (m, 2H), 4.46 (d, *J* = 12.3 Hz, 2H), 4.30 – 4.08 (m, 4H), 1.35 (t, *J* = 7.1 Hz, 7H). **<sup>13</sup>C NMR** (101 MHz, CDCl<sub>3</sub>): δ = 143.9, 140.4, 134.1, 129.2, 128.4, 64.0, 63.9, 53.3, 53.1, 16.4, 16.3. **<sup>31</sup>P NMR** (162 MHz, CDCl<sub>3</sub>) δ = 7.0. **ATR-FTIR** (cm<sup>-1</sup>): 3005, 2647, 1754, 1625, 1522, 1325, 1205, 1100. **HR-MS** (ESI) C<sub>12</sub>H<sub>19</sub>NO<sub>6</sub>SP [M+H]<sup>+</sup>: 336.0665, found: 336.0667.

#### (Z)-1,2-bis(phenylsulfonyl)ethan-1-one oxime (**6p**)

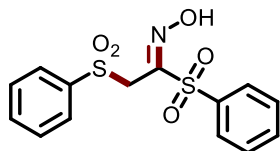

The general procedure 2 was followed using S-phenyl benzenesulfonylthioate (150.0 mg, 0.6 mmol), tert-butyl nitrite (165.0 mg, 1.6 mmol), (vinylsulfonyl)benzene (33.6 mg, 0.2 mmol), and 2-methylpropan-2-ol (0.5 mL), and was purified by silica gel column chromatography (PE/EtOAc = 2/1) to obtain **6p** as colorless oil (30.5 mg, 45%

yield). **<sup>1</sup>H NMR** (400 MHz, CDCl<sub>3</sub>):  $\delta$  = 9.36 (s, 1H), 8.04 – 7.97 (m, 2H), 7.88 – 7.82 (m, 2H), 7.74 – 7.64 (m, 2H), 7.56 (m, 4H), 4.66 (s, 2H). **<sup>13</sup>C NMR** (101 MHz, CDCl<sub>3</sub>):  $\delta$  = 152.1, 139.8, 137.7, 134.8, 134.6, 129.6, 129.5, 129.4, 128.5, 52.1. **ATR-FTIR** (cm<sup>-1</sup>): 3112, 2870, 1625, 1442, 1256, 1102, 1007, 884. **HR-MS** (ESI) C<sub>14</sub>H<sub>14</sub>NO<sub>5</sub>S<sub>2</sub> [M+H]<sup>+</sup>: 340.0308, found: 340.0310.

**(Z)-1-phenyl-2-(phenylsulfonyl)ethan-1-one oxime (6q)<sup>2</sup>**

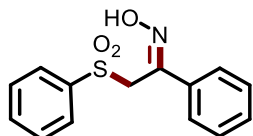

The general procedure 2 was followed using sodium benzenesulfinate (98.4 mg, 0.6 mmol), tert-butyl nitrite (165.0 mg, 1.6 mmol), styrene (20.8 mg, 0.2 mmol), and 2-methylpropan-2-ol (0.5 mL), and was purified by silica gel column chromatography (PE/EtOAc = 2/1) to obtain **6q** as colorless oil (20.9 mg, 38% yield). **<sup>1</sup>H NMR** (400 MHz, CDCl<sub>3</sub>):  $\delta$  = 7.85 – 7.83 (m, 2H), 7.66 – 7.60 (m, 2H), 7.58 (d, *J* = 7.5 Hz, 1H), 7.47 – 7.44 (m, 2H), 7.41 – 7.32 (m, 3H), 4.75 (s, 2H). **<sup>13</sup>C NMR** (101 MHz, CDCl<sub>3</sub>):  $\delta$  = 148.1, 139.6, 134.0, 133.7, 130.2, 129.0, 128.8, 128.7, 126.8, 52.8. **ATR-FTIR** (cm<sup>-1</sup>): 3105, 2871, 1654, 1446, 1239, 1100, 997, 853. **HR-MS** (ESI) C<sub>14</sub>H<sub>14</sub>NO<sub>3</sub>S [M+H]<sup>+</sup>: 276.0689, found: 276.0683.

**Methyl (Z)-4,4,4-trifluoro-2-(hydroxyimino)butanoate (8a)**

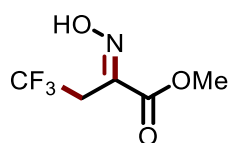

The general procedure 3 was followed using sodium trifluoromethanesulfinate (93.3 mg, 0.6 mmol), tert-butyl nitrite (160.0 mg, 1.6 mmol), methyl acrylate (17.2 mg, 0.2 mmol), 2-methylpropan-2-ol (0.5 mL), and K<sub>3</sub>PO<sub>4</sub> (84.8 mg, 0.4 mmol) and was purified by silica gel column chromatography (PE/EtOAc = 5/1) to obtain **8a** as colorless oil (26.7 mg, 72% yield). **<sup>1</sup>H NMR** (400 MHz, CDCl<sub>3</sub>):  $\delta$  = 9.84 (s, 1H), 3.91 (s, 3H), 3.60 (d, *J* = 10.2 Hz, 2H). **<sup>13</sup>C NMR** (101 MHz, CDCl<sub>3</sub>):  $\delta$  = 163.0, 143.1, 124.2 (d, *J* = 278.2 Hz), 53.4, 29.4 (d, *J* = 32.5 Hz). **<sup>19</sup>F NMR** (471 MHz, CDCl<sub>3</sub>)  $\delta$  = -62.4. **ATR-FTIR** (cm<sup>-1</sup>): 3255, 2930, 1551, 1476, 1328, 1100, 896, 794. **HR-MS** (ESI)

C<sub>5</sub>H<sub>7</sub>F<sub>3</sub>NO<sub>3</sub> [M+H]<sup>+</sup>: 186.0373, found: 186.0377.

**Isobutyl (Z)-4,4,4-trifluoro-2-(hydroxyimino)butanoate (8b)<sup>3</sup>**

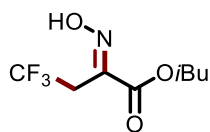

The general procedure 3 was followed using sodium trifluoromethanesulfinate (93.3 mg, 0.6 mmol), tert-butyl nitrite (160.0 mg, 1.6 mmol), isobutyl acrylate (25.6 mg, 0.2 mmol), 2-methylpropan-2-ole (0.5 mL), and K<sub>3</sub>PO<sub>4</sub> (84.8 mg, 0.4 mmol) and was purified by silica gel column chromatography (PE/EtOAc = 5/1) to obtain **8c** as colorless oil (20.9 mg, 46% yield). <sup>1</sup>H NMR (400 MHz, CDCl<sub>3</sub>): δ = 10.84 (s, 1H), 4.08 (d, *J* = 6.7 Hz, 2H), 3.60 – 3.55 (m, 2H), 0.97 (d, *J* = 6.7 Hz, 6H). <sup>13</sup>C NMR (101 MHz, CDCl<sub>3</sub>): δ = 162.5, 142.7, 128.8 – 118.9 (m), 72.7, 29.4 (q, *J* = 32.4 Hz), 27.8, 19.0. <sup>19</sup>F NMR (376 MHz, CDCl<sub>3</sub>) δ = -62.3. ATR-FTIR (cm<sup>-1</sup>): 3059, 2881, 1960, 1744, 1671, 1551, 1372, 996. HR-MS (ESI) C<sub>8</sub>H<sub>13</sub>F<sub>3</sub>NO<sub>3</sub> [M+H]<sup>+</sup>: 228.0842, found:228.0842 .

**Benzyl (Z)-4,4,4-trifluoro-2-(hydroxyimino)butanoate (8c)**

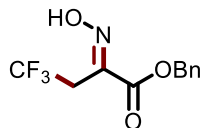

The general procedure 3 was followed using sodium trifluoromethanesulfinate (93.3 mg, 0.6 mmol), tert-butyl nitrite (160.0 mg, 1.6 mmol), benzyl acrylate (32.4 mg, 0.2 mmol), 2-methylpropan-2-ole (0.5 mL), and K<sub>3</sub>PO<sub>4</sub> (84.8 mg, 0.4 mmol) and was purified by silica gel column chromatography (PE/EtOAc = 5/1) to obtain **8d** as colorless oil (18.8 mg, 36% yield). <sup>1</sup>H NMR (400 MHz, CDCl<sub>3</sub>): δ = 10.39 (s, 1H), 7.40 – 7.26 (m, 5H), 5.31 (s, 2H), 3.59 – 3.52 (m, 2H). <sup>13</sup>C NMR (101 MHz, CDCl<sub>3</sub>): δ = 162.3, 142.7, 134.8, 129.1, 128.9, 128.8, 124.2 (d, *J* = 278.0 Hz), 68.4, 29.4 (q, *J* = 32.7 Hz). <sup>19</sup>F NMR (376 MHz, CDCl<sub>3</sub>) δ = -62.3. ATR-FTIR (cm<sup>-1</sup>): 3271, 2997, 2368, 1697, 1528, 1427, 1334, 1265. HR-MS (ESI) C<sub>11</sub>H<sub>11</sub>F<sub>3</sub>NO<sub>3</sub> [M+H]<sup>+</sup>: 262.0686, found: 262.0688.

**2-Methoxyethyl (Z)-4,4,4-trifluoro-2-(hydroxyimino)butanoate (8d)**

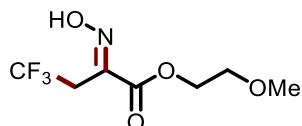

The general procedure 3 was followed using sodium trifluoromethanesulfinate (93.3 mg, 0.6 mmol), *tert*-butyl nitrite (160.0 mg, 1.6 mmol), 2-methoxyethyl acrylate (26.0 mg, 0.2 mmol), 2-methylpropan-2-ol (0.5 mL), and  $K_3PO_4$  (84.8 mg, 0.40 mmol) and was purified by silica gel column chromatography (PE/EtOAc = 2/1) to obtain **8b** as colorless oil (23.4 mg, 51% yield).  **$^1H$  NMR** (400 MHz,  $CDCl_3$ ):  $\delta$  = 10.8 (s, 1H), 4.8 – 4.2 (m, 2H), 3.8 – 3.7 (m, 2H), 3.6 (q,  $J$  = 10.2 Hz, 2H), 3.4 (s, 3H).  **$^{13}C$  NMR** (101 MHz,  $CDCl_3$ ):  $\delta$  = 162.5, 142.3 (d,  $J$  = 2.5 Hz), 124.2 (q,  $J$  = 278.3 Hz), 70.1, 65.0, 59.0, 29.3 (q,  $J$  = 32.5 Hz).  **$^{19}F$  NMR** (376 MHz,  $CDCl_3$ )  $\delta$  = -62.3. **ATR-FTIR** ( $cm^{-1}$ ): 3258, 2910, 1773, 1641, 1596, 1238, 1160, 942. **HR-MS** (ESI)  $C_7H_{11}F_3NO_3$   $[M+H]^+$ : 230.0635, found: 230.0641.

#### 2-Bromoethyl (Z)-4,4,4-trifluoro-2-(hydroxyimino)butanoate (**8e**)

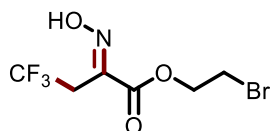

The general procedure 3 was followed using sodium trifluoromethanesulfinate (93.3 mg, 0.6 mmol), *tert*-butyl nitrite (160.0 mg, 1.6 mmol), 2-bromoethyl acrylate (35.6 mg, 0.2 mmol), 2-methylpropan-2-ole (0.5 mL), and  $K_3PO_4$  (84.8 mg, 0.40 mmol) and was purified by silica gel column chromatography (PE/EtOAc = 5/1) to obtain **8e** as colorless oil (23.5 mg, 42% yield).  **$^1H$  NMR** (400 MHz,  $CDCl_3$ ):  $\delta$  = 10.12 (s, 1H), 4.62 – 4.59 (m, 2H), 3.89 – 3.35 (m, 4H).  **$^{13}C$  NMR** (101 MHz,  $CDCl_3$ ):  $\delta$  = 162.0, 142.6, 124.1 (d,  $J$  = 278.4 Hz), 65.6, 30.4, 27.8.  **$^{19}F$  NMR** (376 MHz,  $CDCl_3$ ):  $\delta$  = -62.3. **ATR-FTIR** ( $cm^{-1}$ ): 3075, 2776, 1922, 1514, 1322, 1255, 1036, 997. **HR-MS** (ESI)  $C_6H_8BrF_3NO_3$   $[M+H]^+$ : 277.9634, found: 277.9635.

### 2-Hydroxyethyl (Z)-4,4,4-trifluoro-2-(hydroxyimino)butanoate(8f)

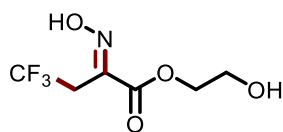

The general procedure 3 was followed using sodium trifluoromethanesulfinate (93.3 mg, 0.6 mmol), tert-butyl nitrite (160.0 mg, 1.6 mmol), 2-hydroxyethyl acrylate (25.6 mg, 0.2 mmol), 2-methylpropan-2-ole (0.5 mL), and  $K_3PO_4$  (84.8 mg, 0.40 mmol) and was purified by silica gel column chromatography (PE/EtOAc = 1/1) to obtain **8f** as colorless oil (15.7 mg, 35% yield).  $^1H$  NMR (400 MHz,  $CDCl_3$ ):  $\delta$  = 11.08 (s, 1H), 4.41 – 4.39 (m, 2H), 3.9 – 3.92 (m, 2H), 3.64 – 3.56 (m, 2H).  $^{13}C$  NMR (101 MHz,  $CDCl_3$ ):  $\delta$  = 162.5, 142.8, 124.2 (d,  $J$  = 278.3 Hz), 67.8, 60.6, 32.9 – 25.6 (m).  $^{19}F$  NMR (376 MHz,  $CDCl_3$ ):  $\delta$  = -62.3. ATR-FTIR ( $cm^{-1}$ ): 3017, 2912, 1963, 1845, 1533, 1227, 1008, 921. HR-MS (ESI)  $C_6H_9F_3NO_4$   $[M+H]^+$ : 216.0478, found: 216.0479.

### (E)-3,3,3-trifluoro-1-phenylpropan-1-one oxime (8g)<sup>3</sup>

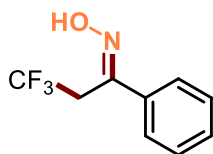

The general procedure 3 was followed using sodium trifluoromethanesulfinate (93.3 mg, 0.6 mmol), tert-butyl nitrite (160.0 mg, 1.6 mmol), styrene (20.8 mg, 0.2 mmol), 2-methylpropan-2-ole (0.5 mL), and  $K_3PO_4$  (84.8 mg, 0.40 mmol) and was purified by silica gel column chromatography (PE/EtOAc = 5/1) to obtain **8g** as colorless oil (18.7 mg, 46% yield).  $^1H$  NMR (400 MHz,  $DMSO-d_6$ ):  $\delta$  = 11.14 (s, 1H), 6.88 – 6.86 (m, 2H), 6.57 – 6.55 (m, 3H), 3.09 (q,  $J$  = 11.3 Hz, 3H).  $^{13}C$  NMR (101 MHz,  $DMSO-d_6$ ):  $\delta$  = 146.9, 134.9, 129.2, 128.4, 126.0, 125.1 (d,  $J$  = 278.3 Hz), 28.7 (q,  $J$  = 29.9 Hz).  $^{19}F$  NMR (376 MHz,  $DMSO-d_6$ ):  $\delta$  = -60.3. ATR-FTIR ( $cm^{-1}$ ): 3028, 2900, 1872, 1673, 1455, 1369, 1215, 883. HR-MS (ESI)  $C_9H_9F_3NO$   $[M+H]^+$ : 204.0631, found: 204.0632.

### N-phenyl-2-(phenylsulfonyl)acetamide (9a)



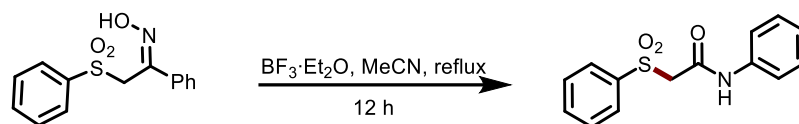

(*Z*)-1-phenyl-2-(phenylsulfonyl)ethan-1-one oxime (55.0 mg, 0.2 mmol, 1 equiv.), Boron trifluoride diethyl etherate (85.0 mg, 0.6 mmol, 3 equiv.) were dissolved in Acetonitrile (1.0 mL) and reflux for 12 h in a nitrogen atmosphere. The resulting mixture was concentrated under vacuum and the crude product was purified by silica gel chromatography using a mixture of petroleum ether and ethyl acetate as eluent and 2-(diphenylphosphoryl)-1-phenylethan-1-one (253.0 mg, 92% yield) was isolated as a colourless oil.

$^1\text{H NMR}$  (400 MHz,  $\text{CDCl}_3$ ):  $\delta$  = 8.55 (s, 1H), 7.98 – 7.88 (m, 2H), 7.73 – 7.65 (m, 1H), 7.58 (dd,  $J$  = 8.4, 7.2 Hz, 2H), 7.49 (d,  $J$  = 7.4 Hz, 2H), 7.34 (t,  $J$  = 7.9 Hz, 2H), 7.21 – 7.13 (m, 1H), 4.18 (s, 2H).  $^{13}\text{C NMR}$  (101 MHz,  $\text{CDCl}_3$ ):  $\delta$  = 158.5, 137.9, 137.0, 134.6, 129.5, 129.1, 128.1, 125.2, 120.2, 62.9. **HR-MS** (ESI)  $\text{C}_{14}\text{H}_{14}\text{NO}_3\text{S}$   $[\text{M}+\text{H}]^+$ : 276.0689, found: 276.0690.

# 5. NMR Spectra

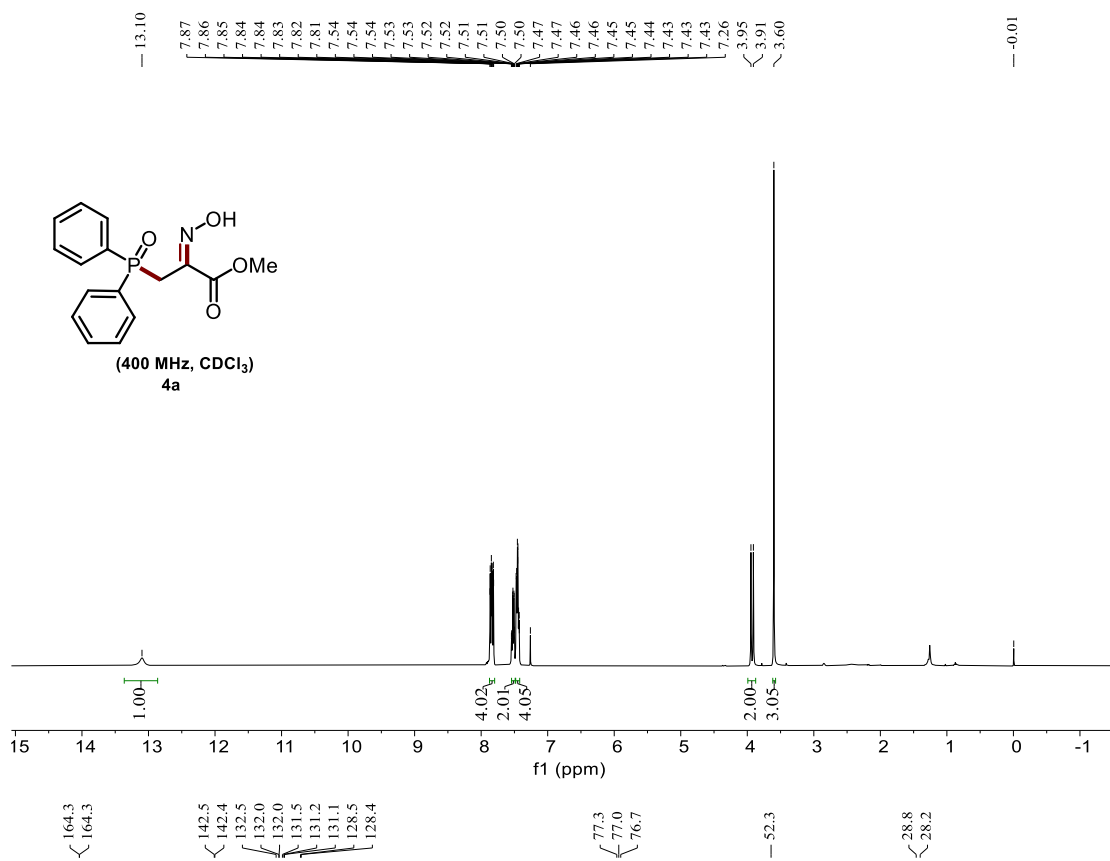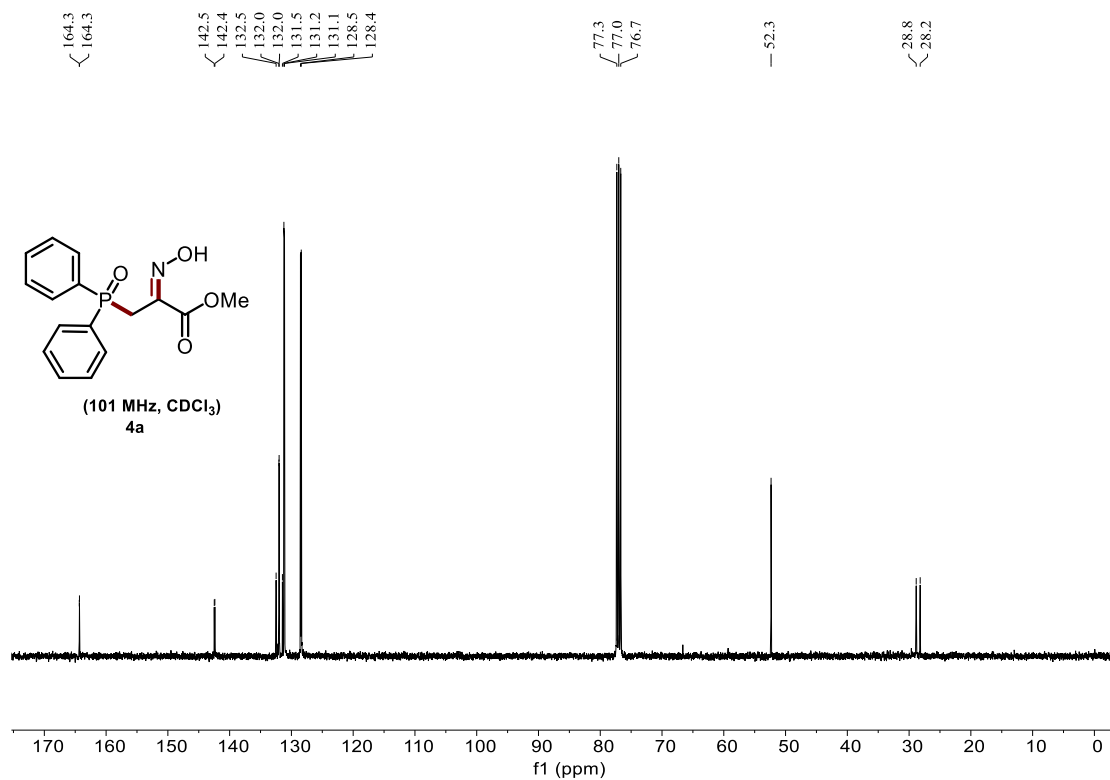

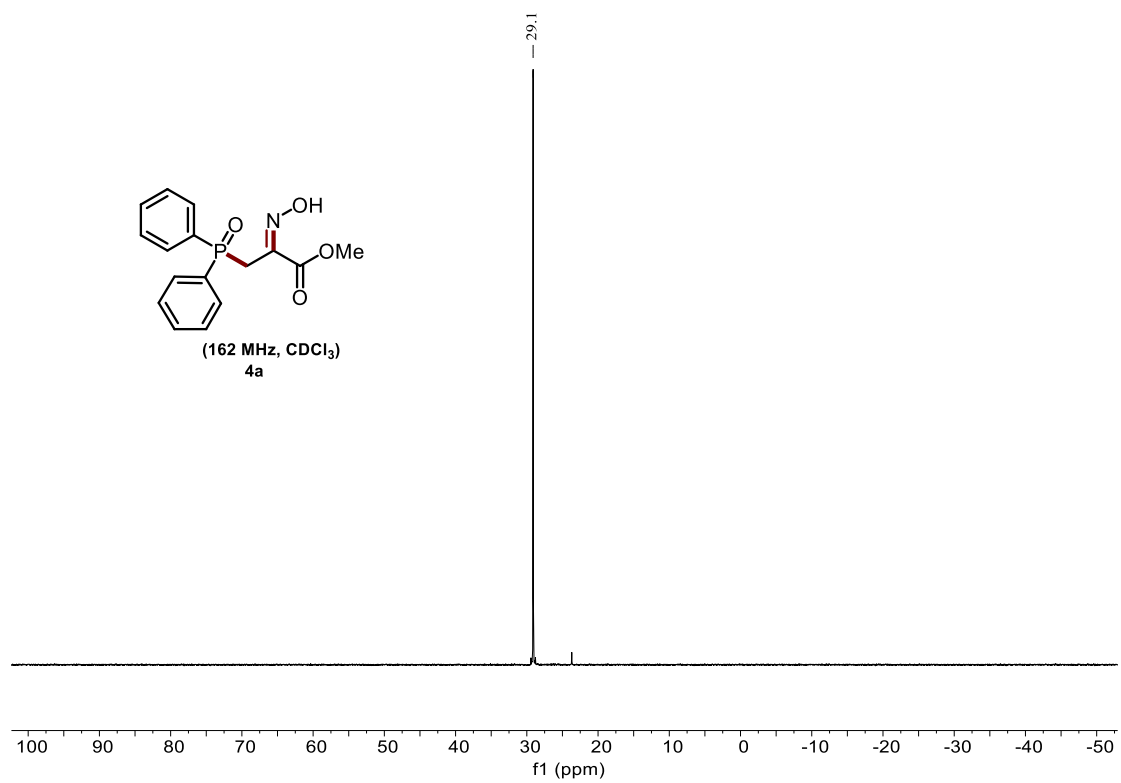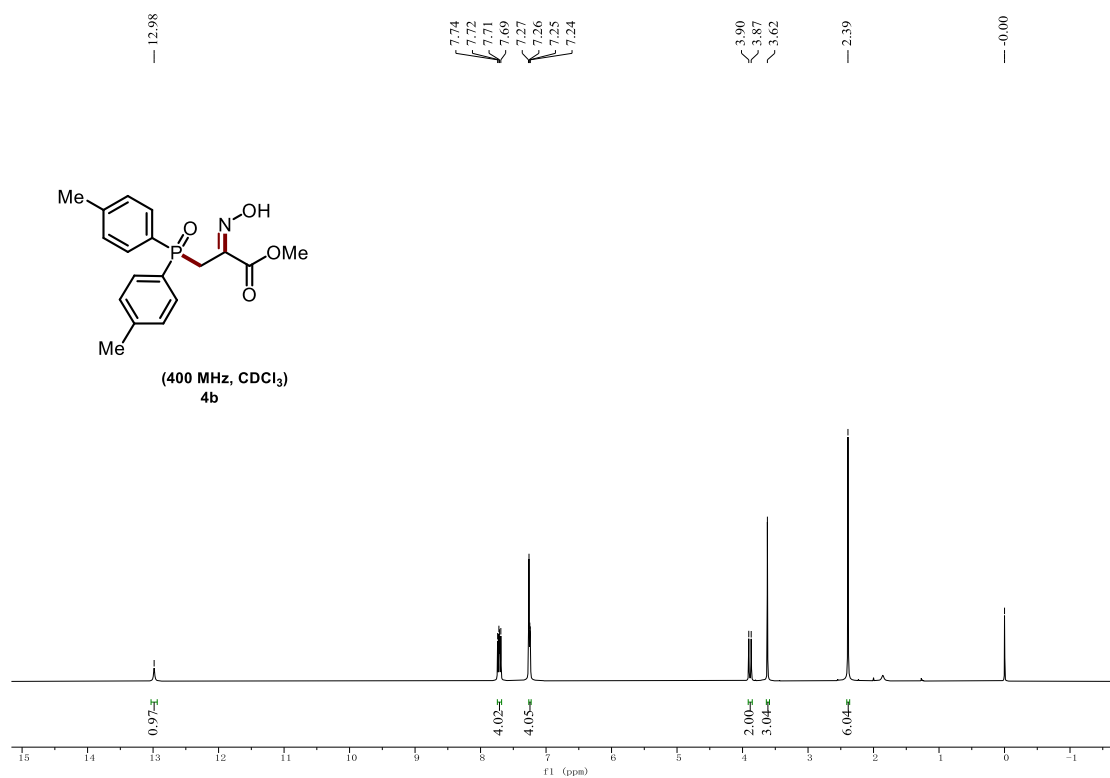

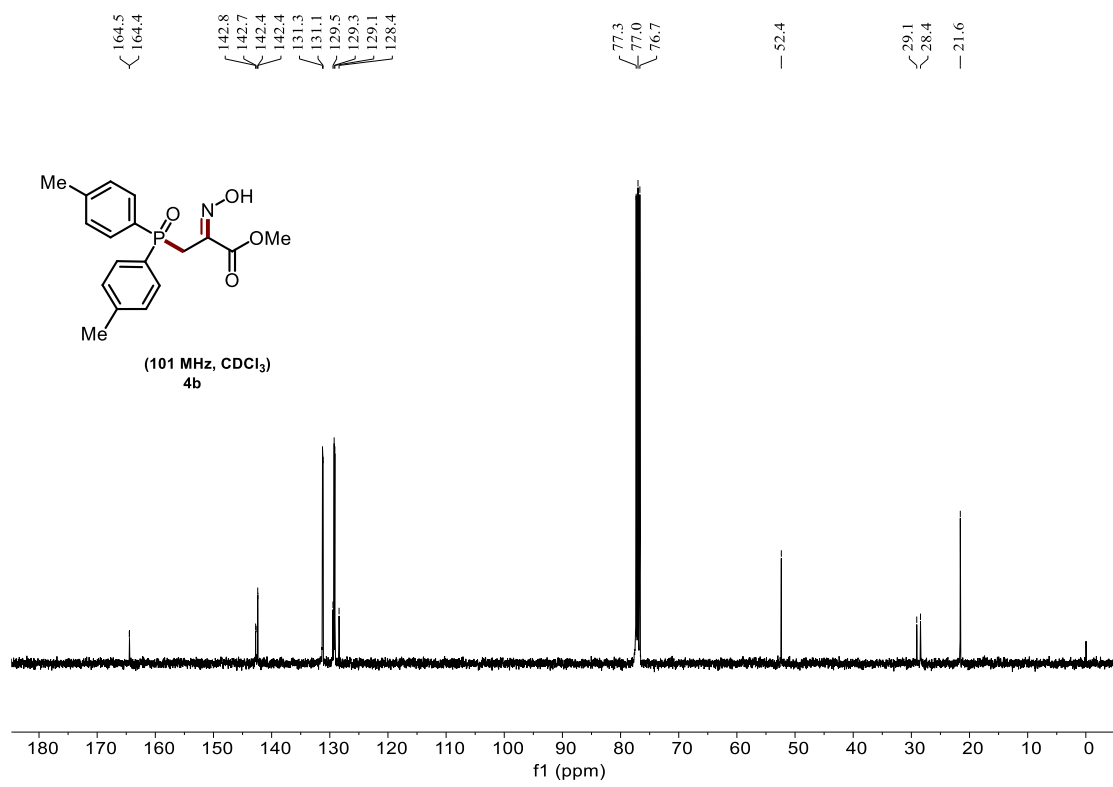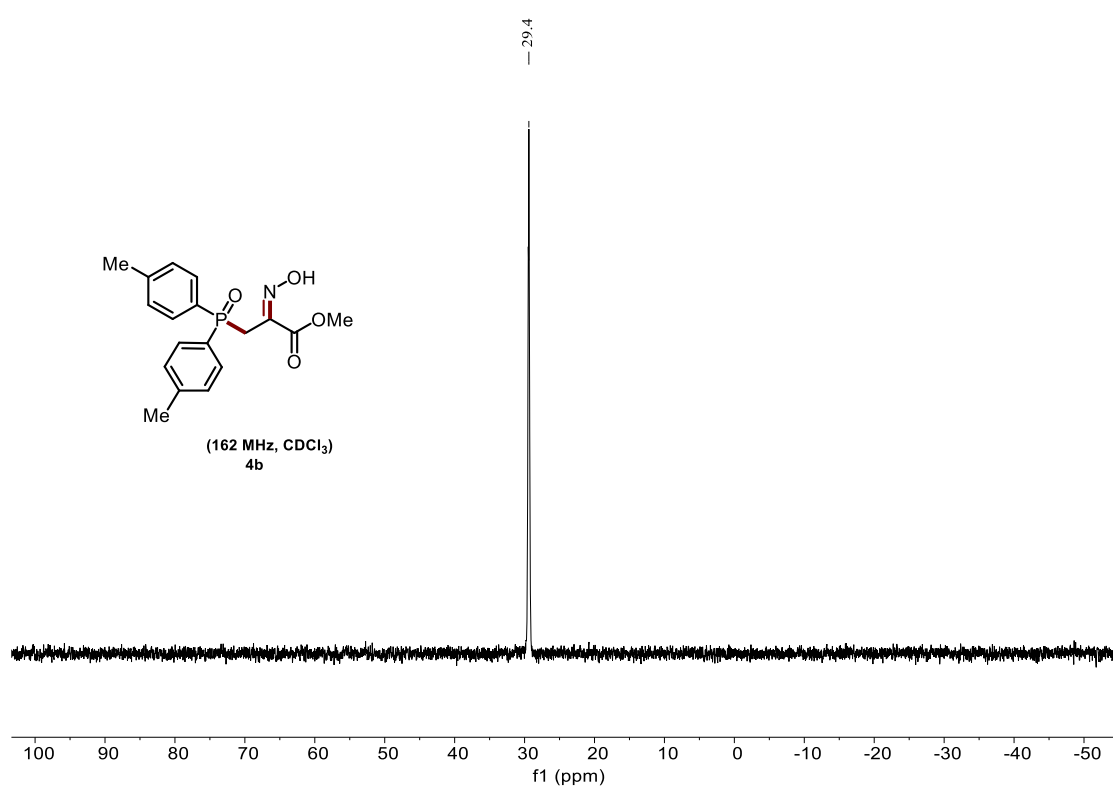

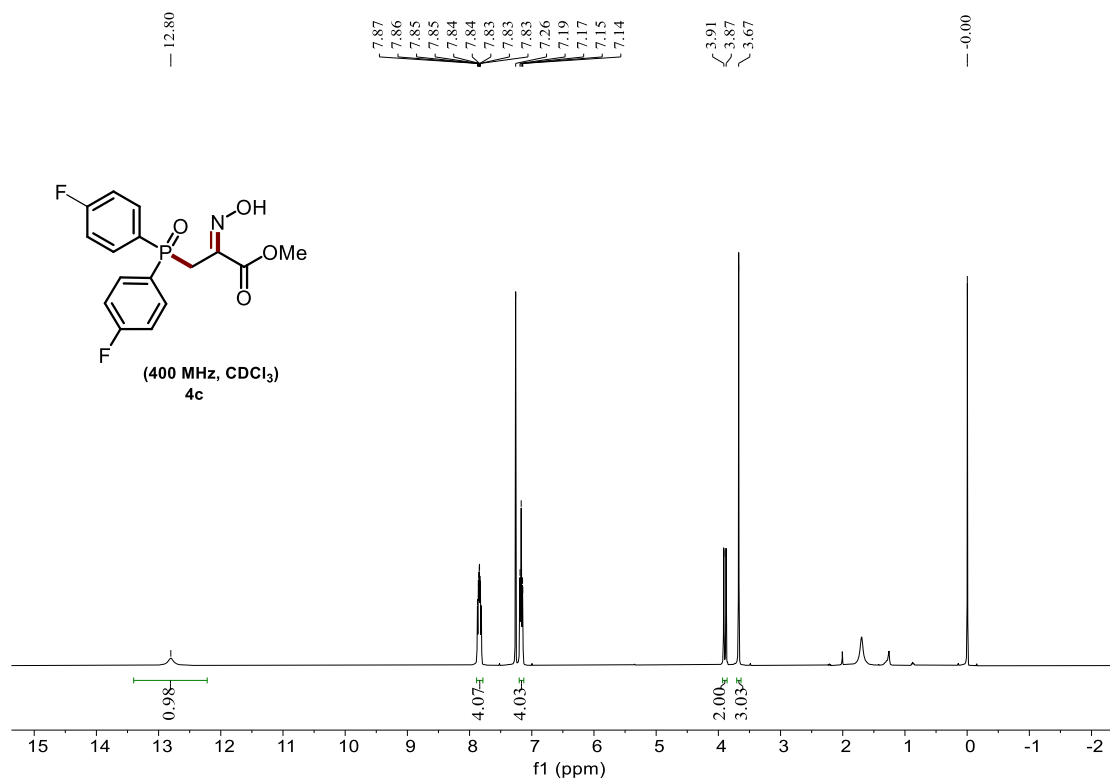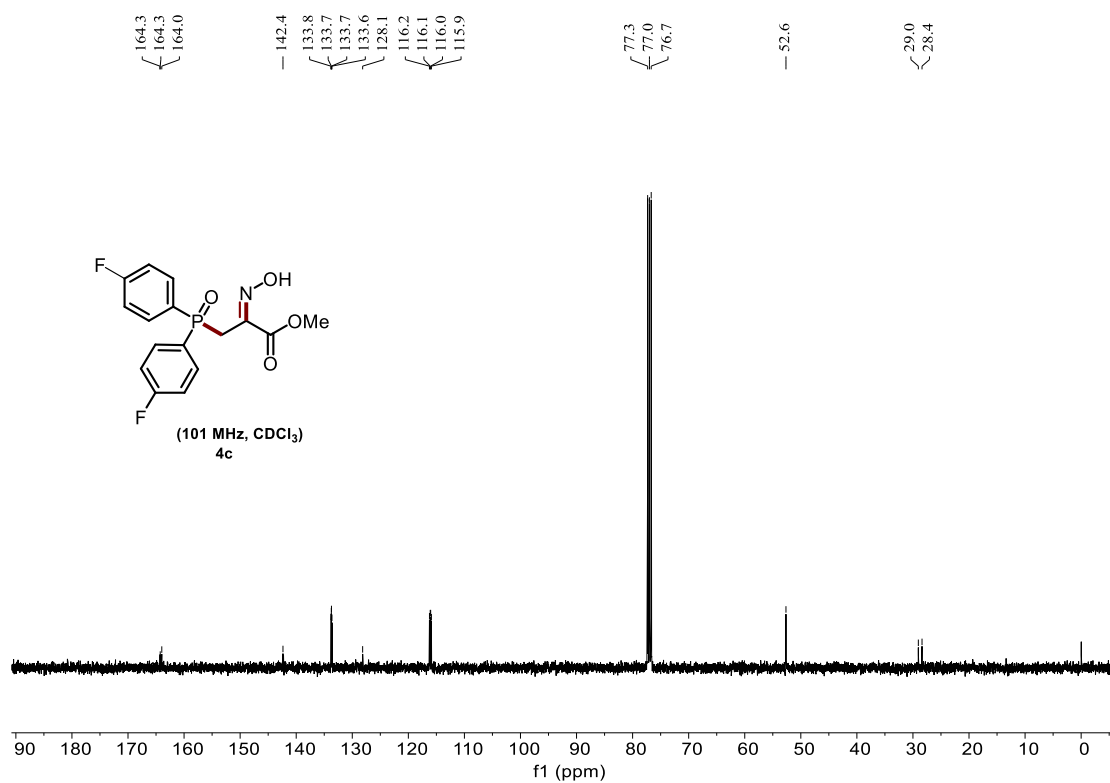

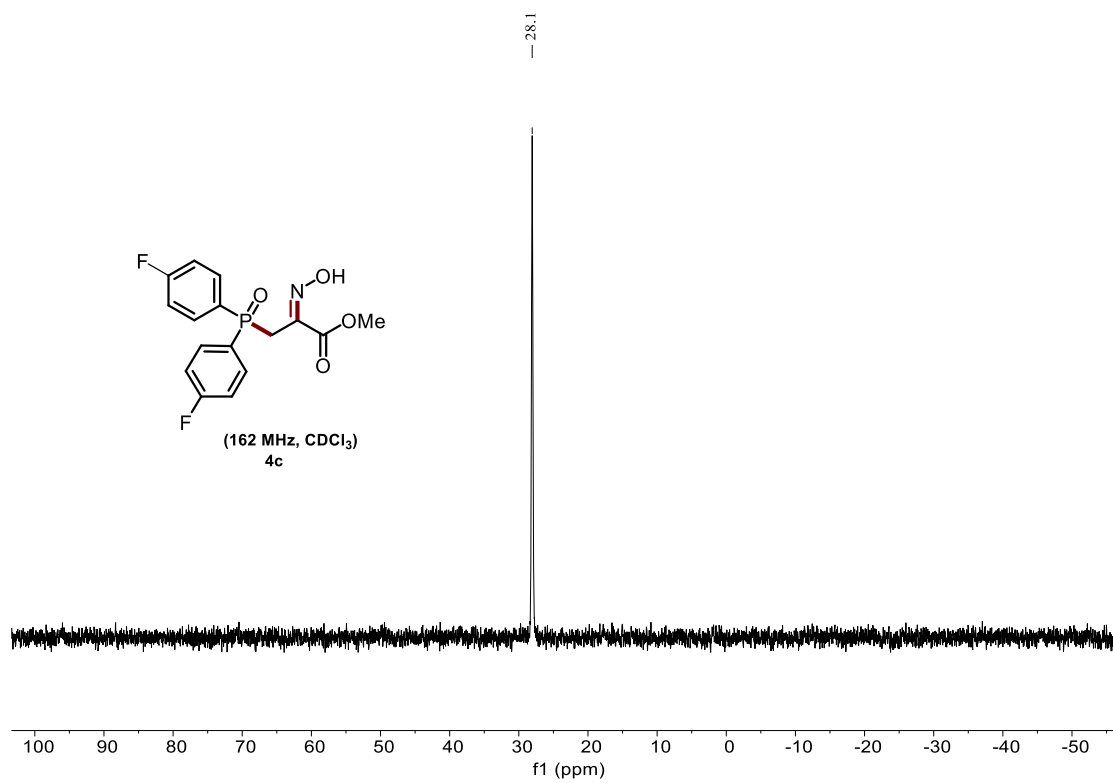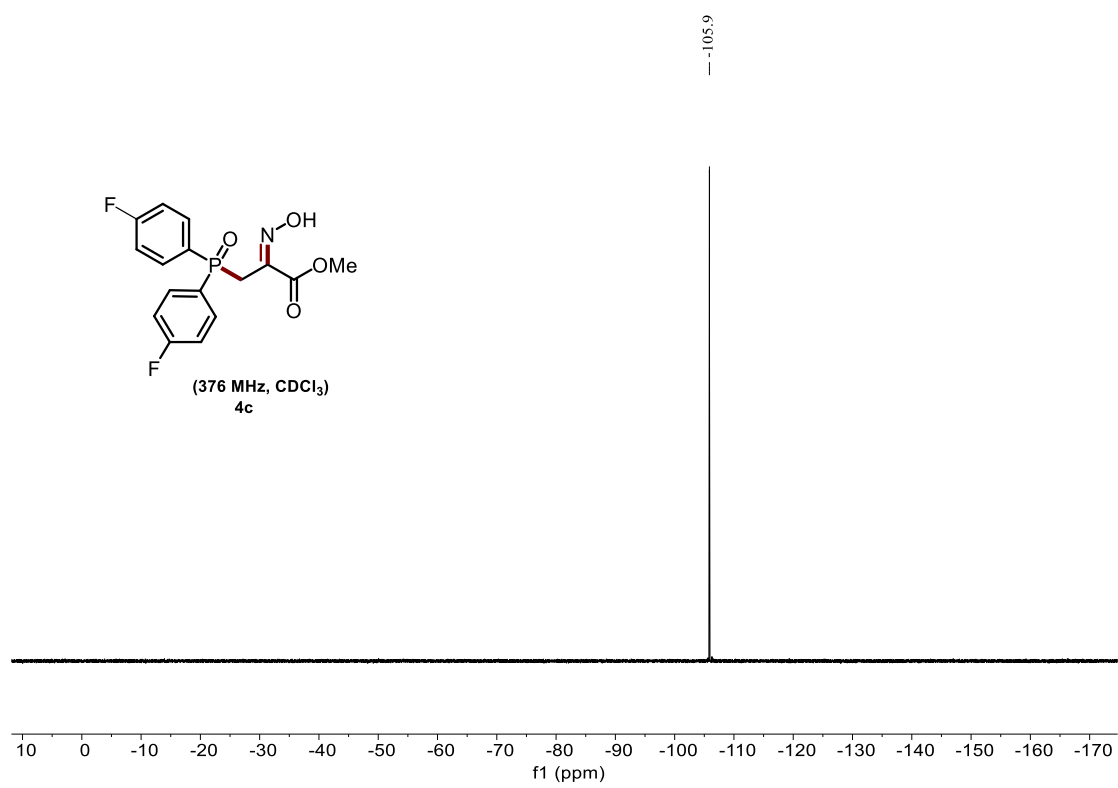

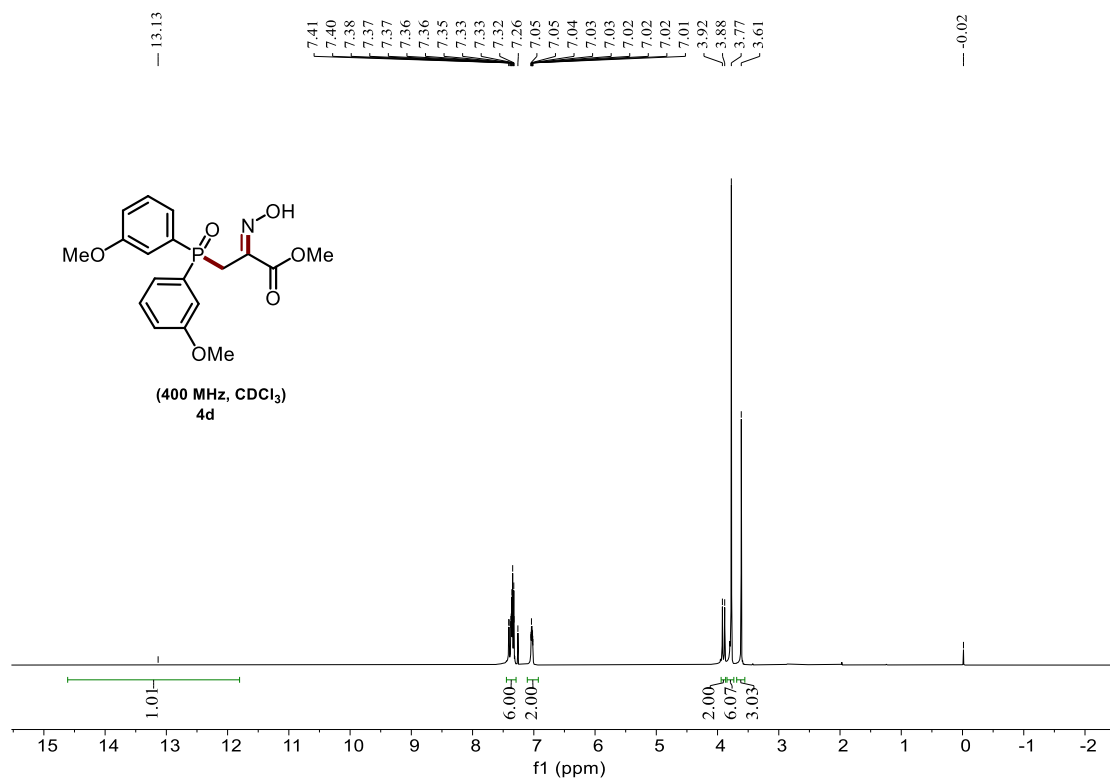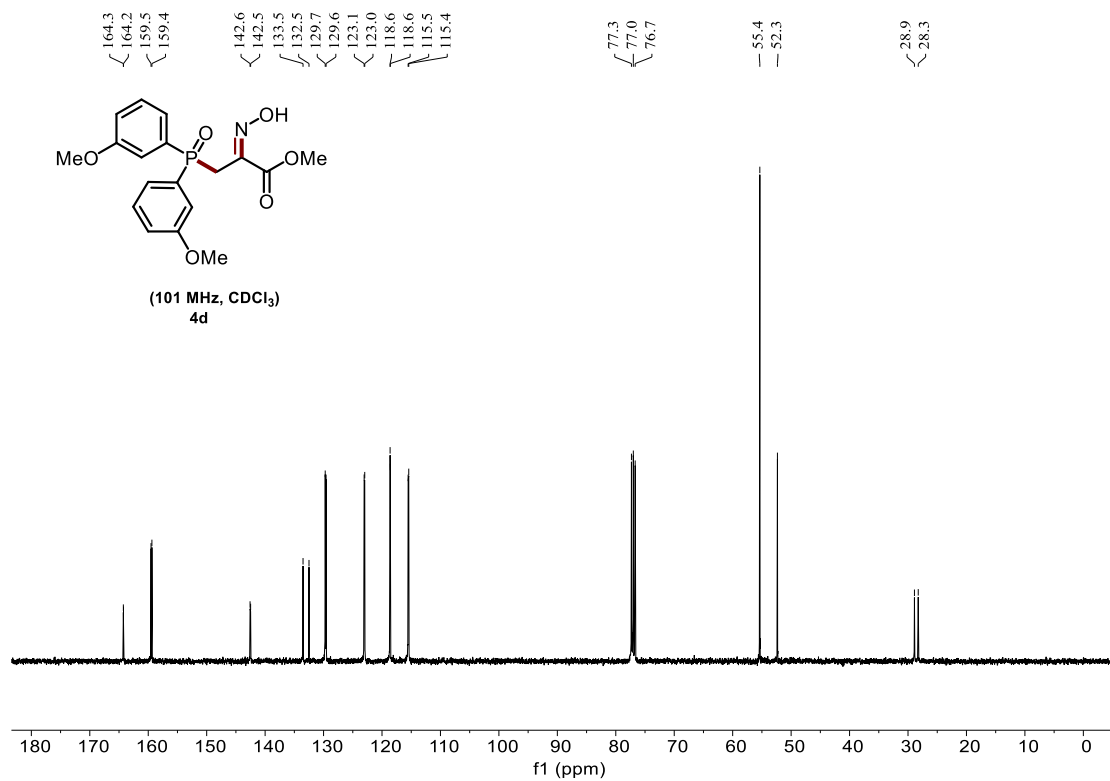

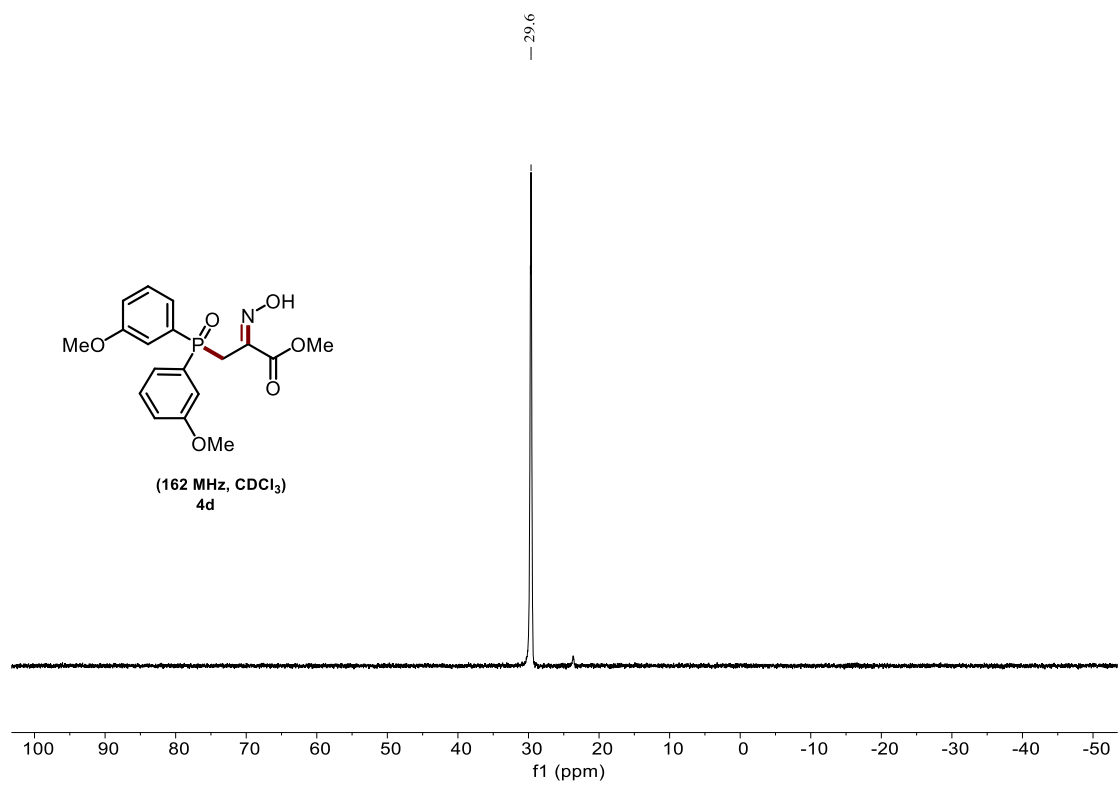

- 12.78

7.43  
7.40  
7.26  
7.25  
7.12

3.90  
3.86  
3.61  
3.60

2.32  
2.31

- 0.00

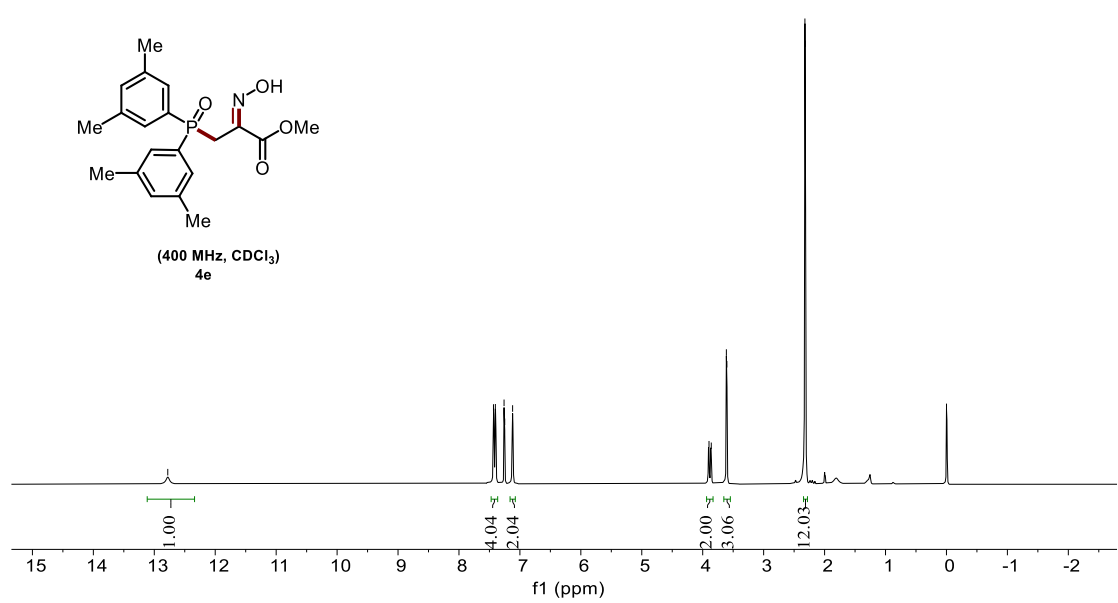

1.00

4.04

2.04

2.00

3.06

12.03



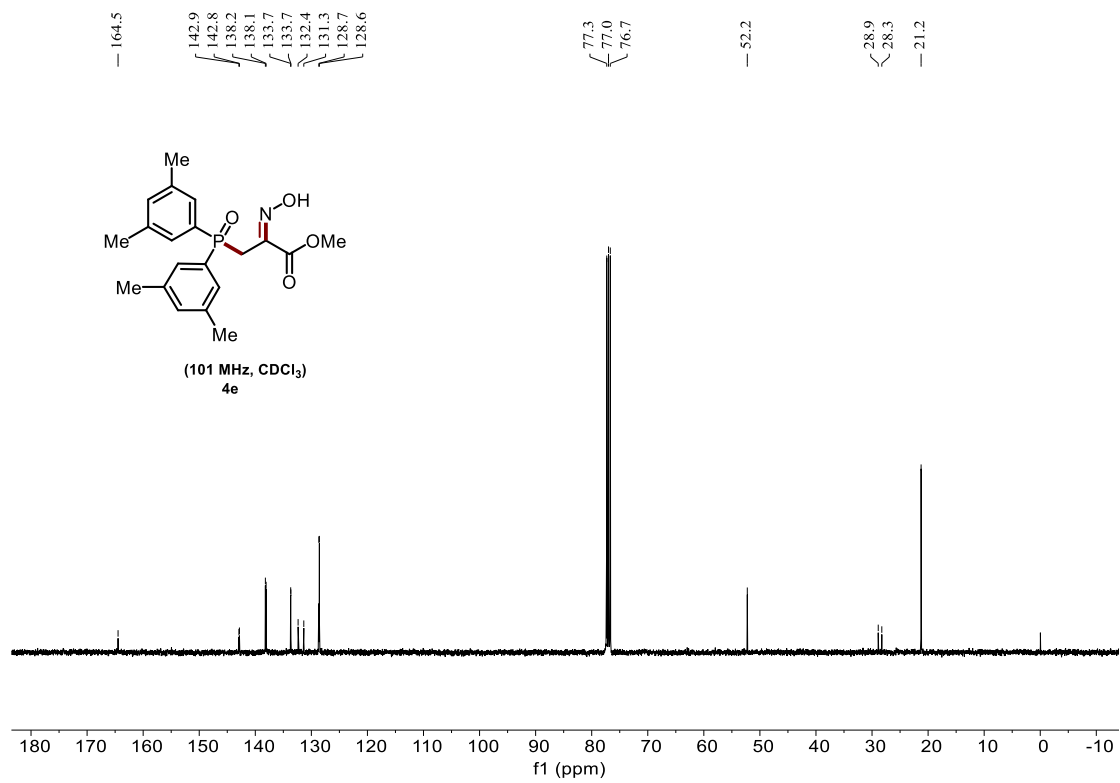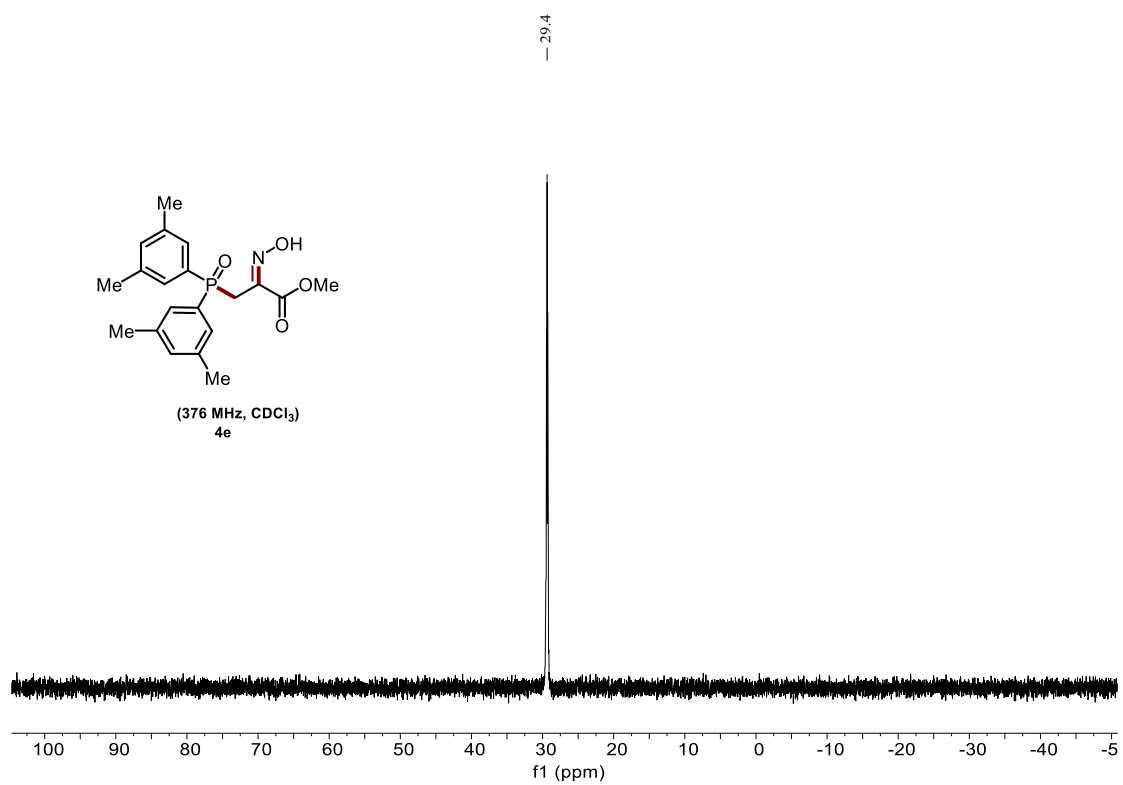

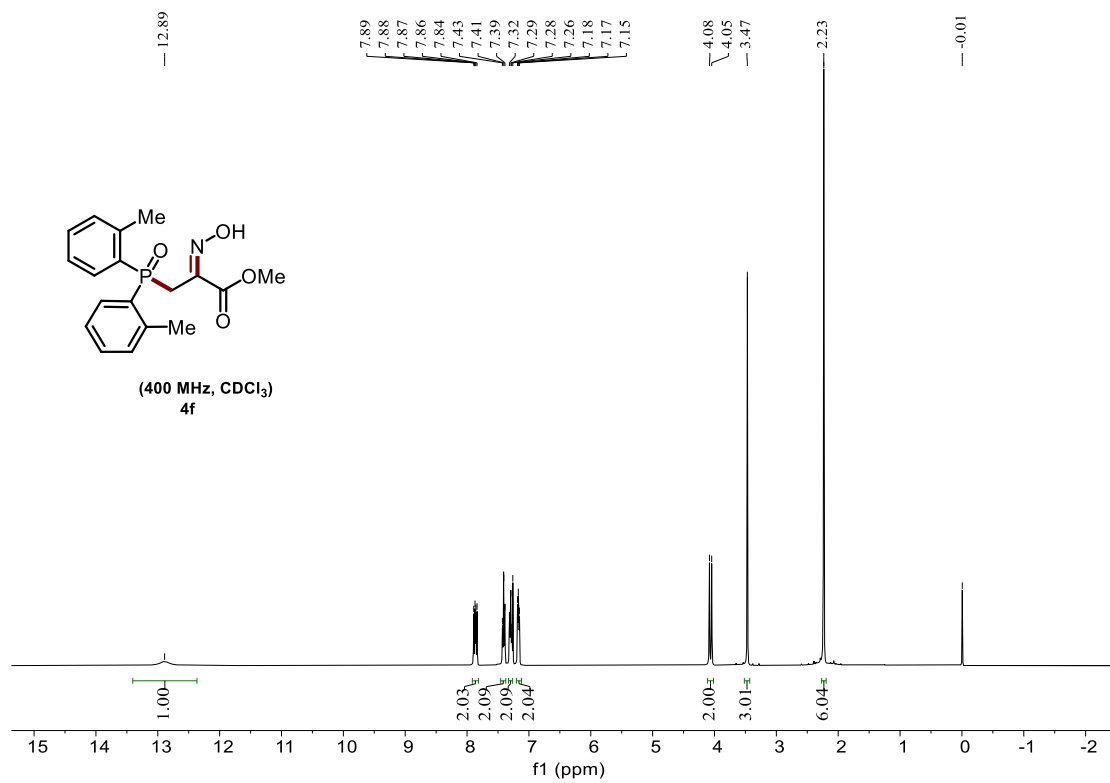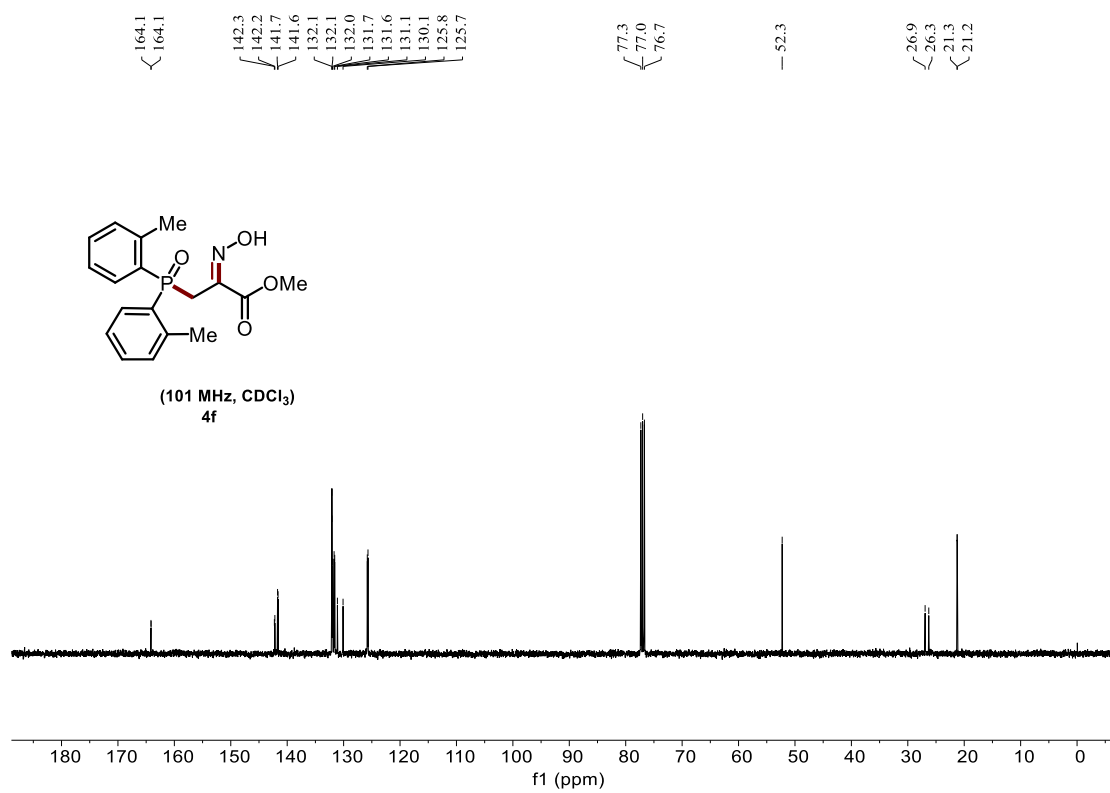

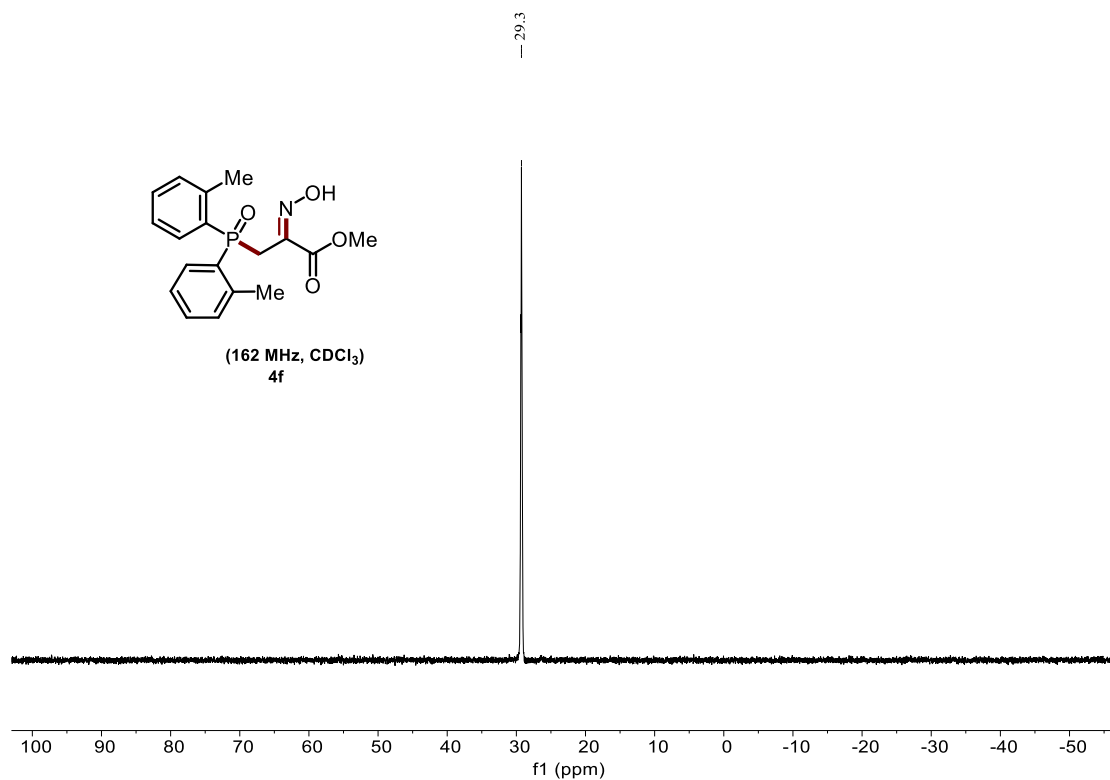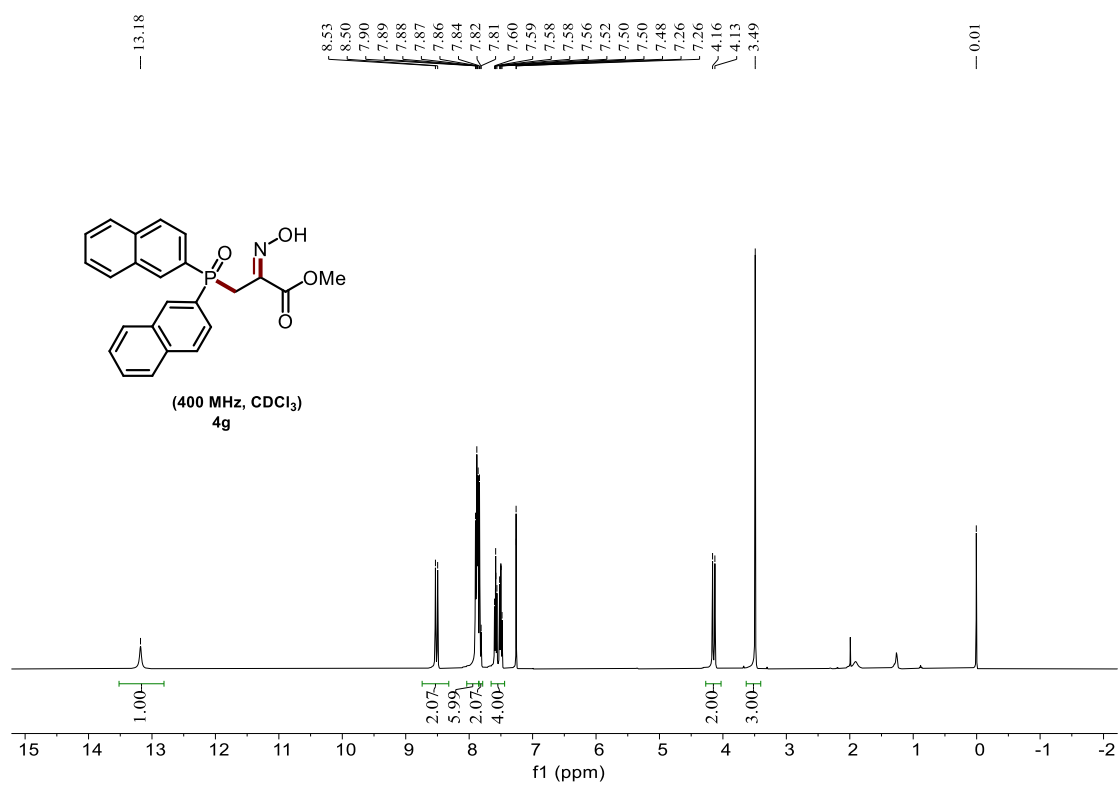

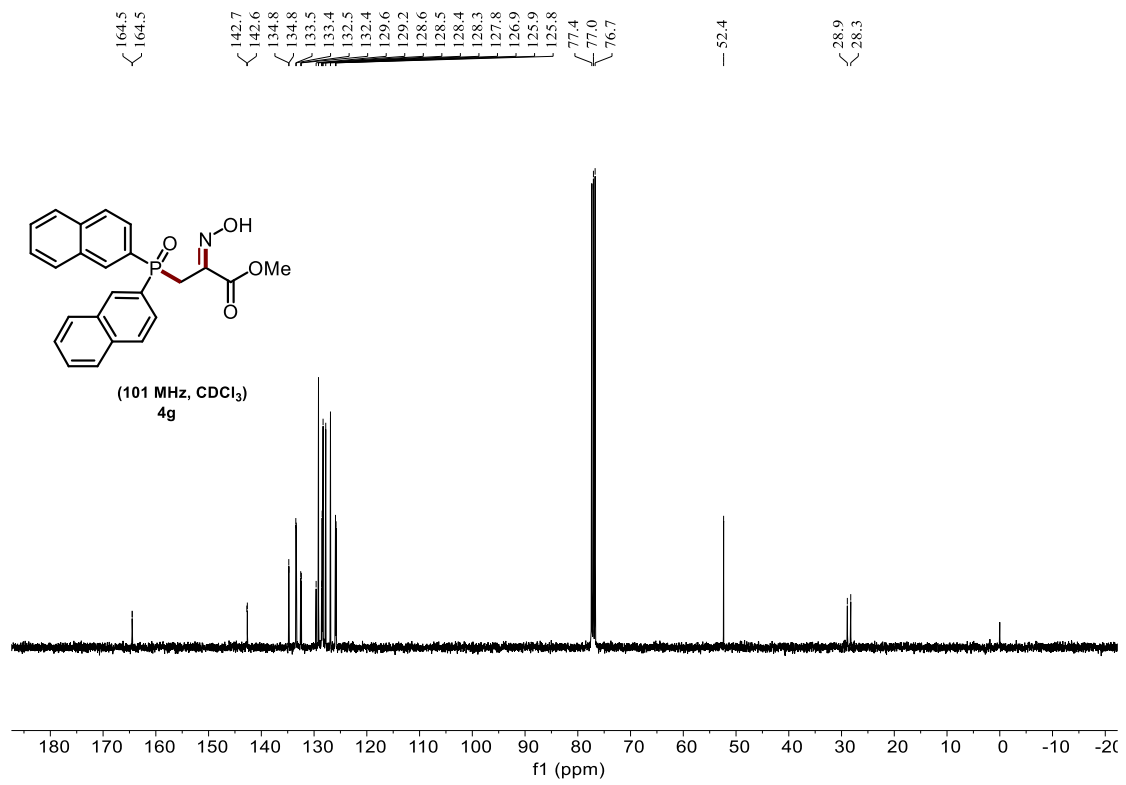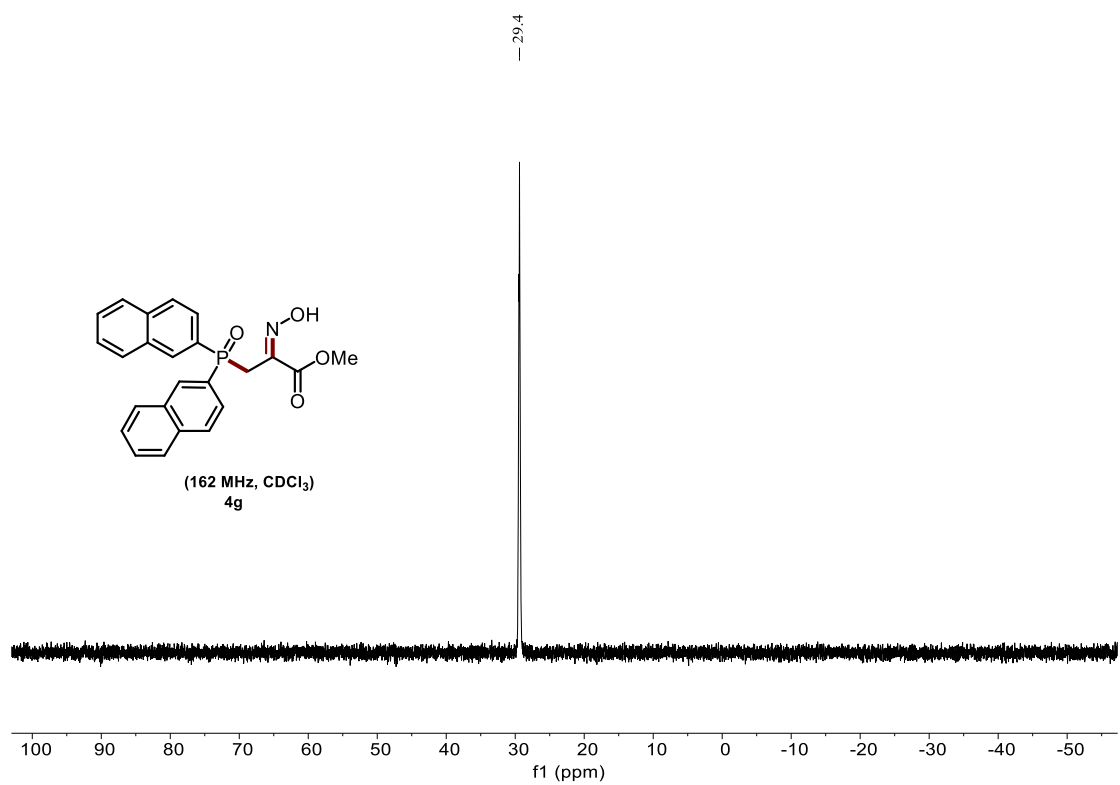

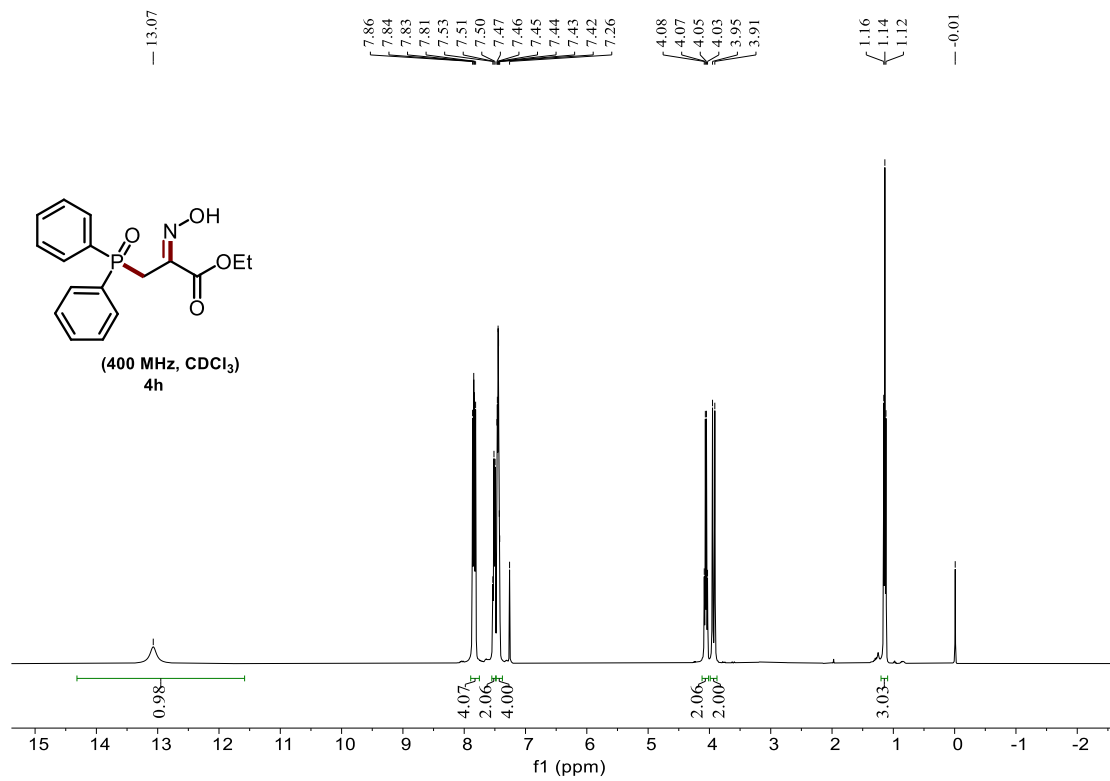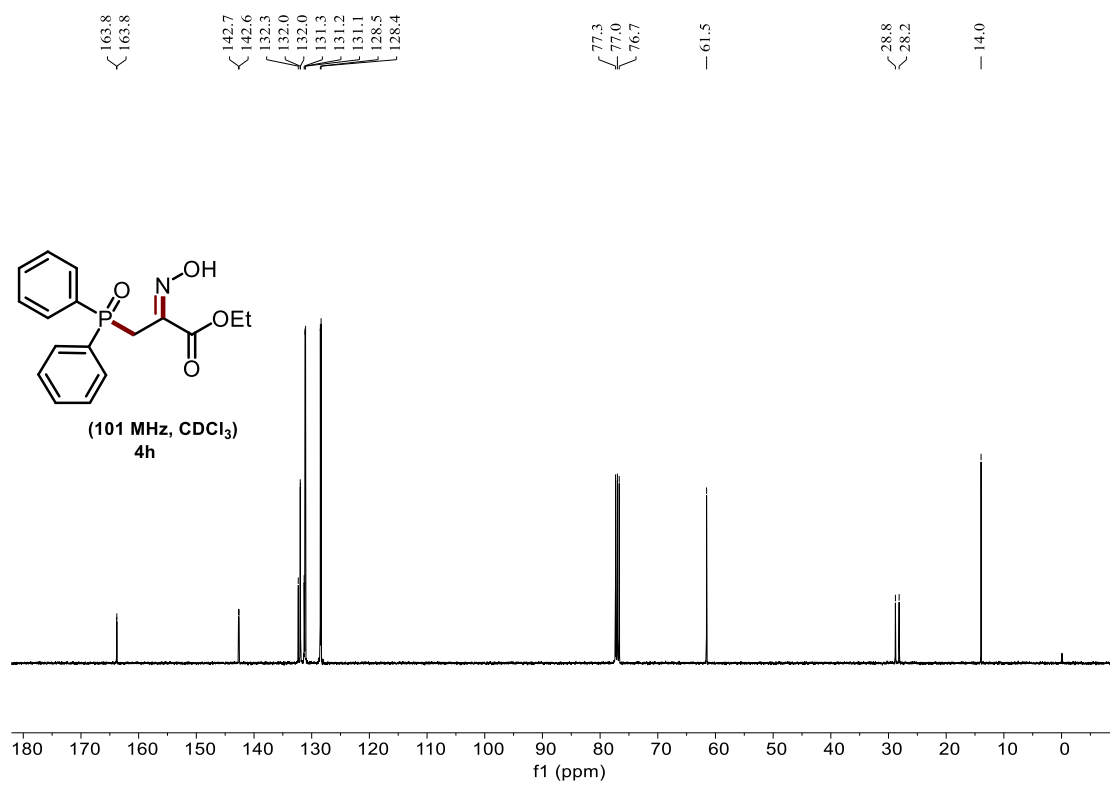

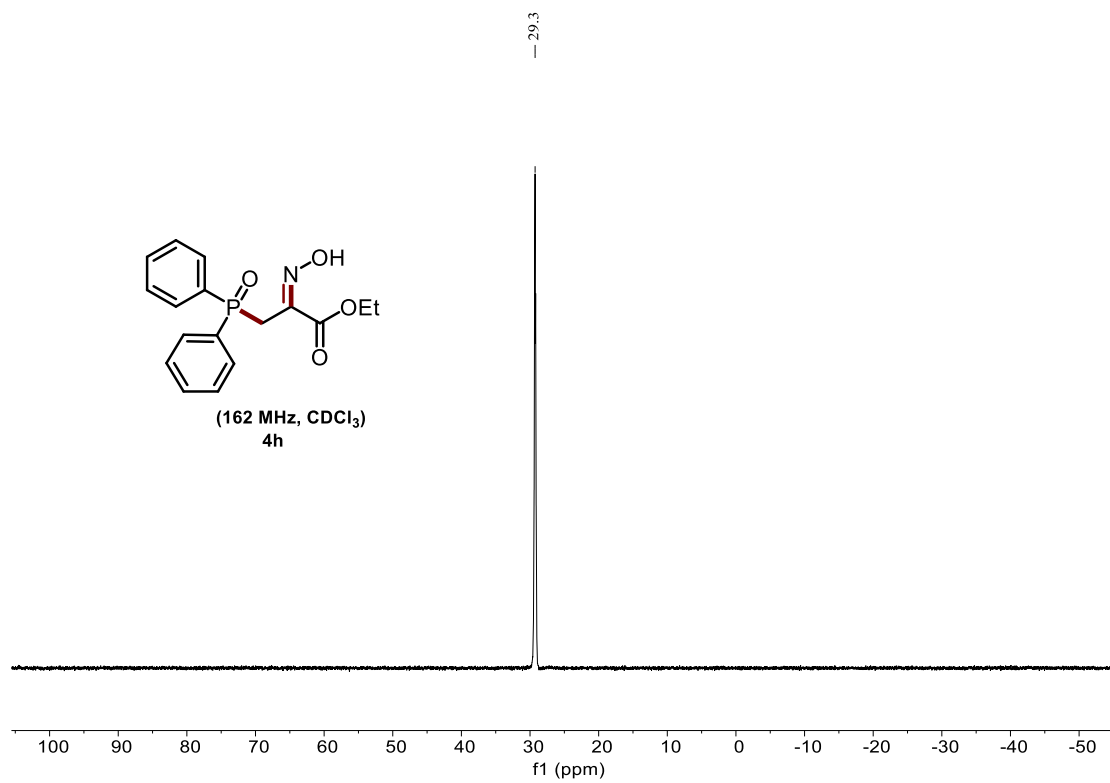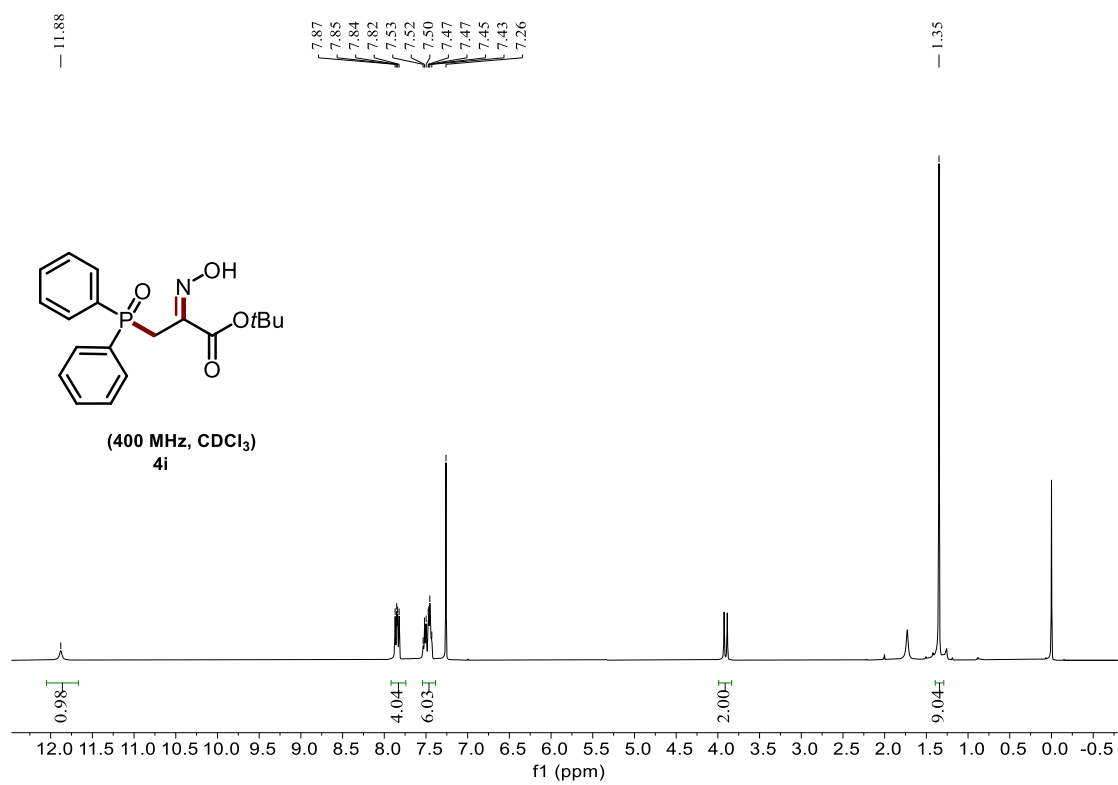

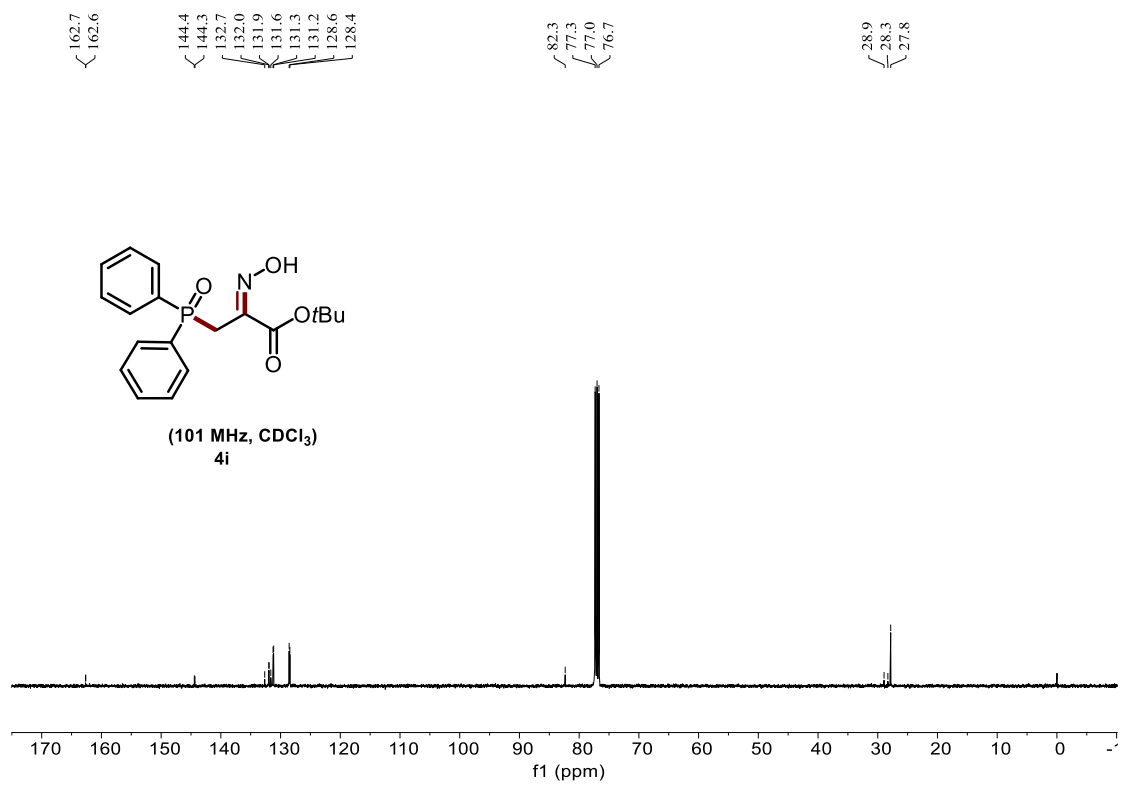

- 28.7

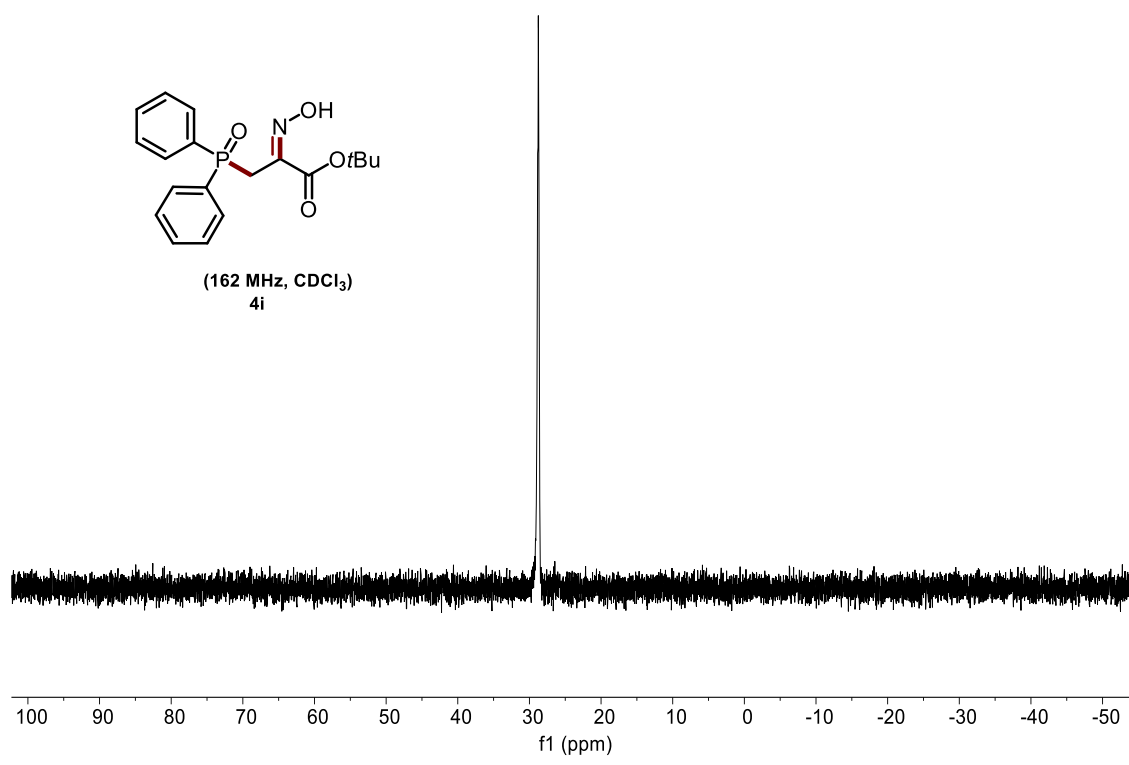

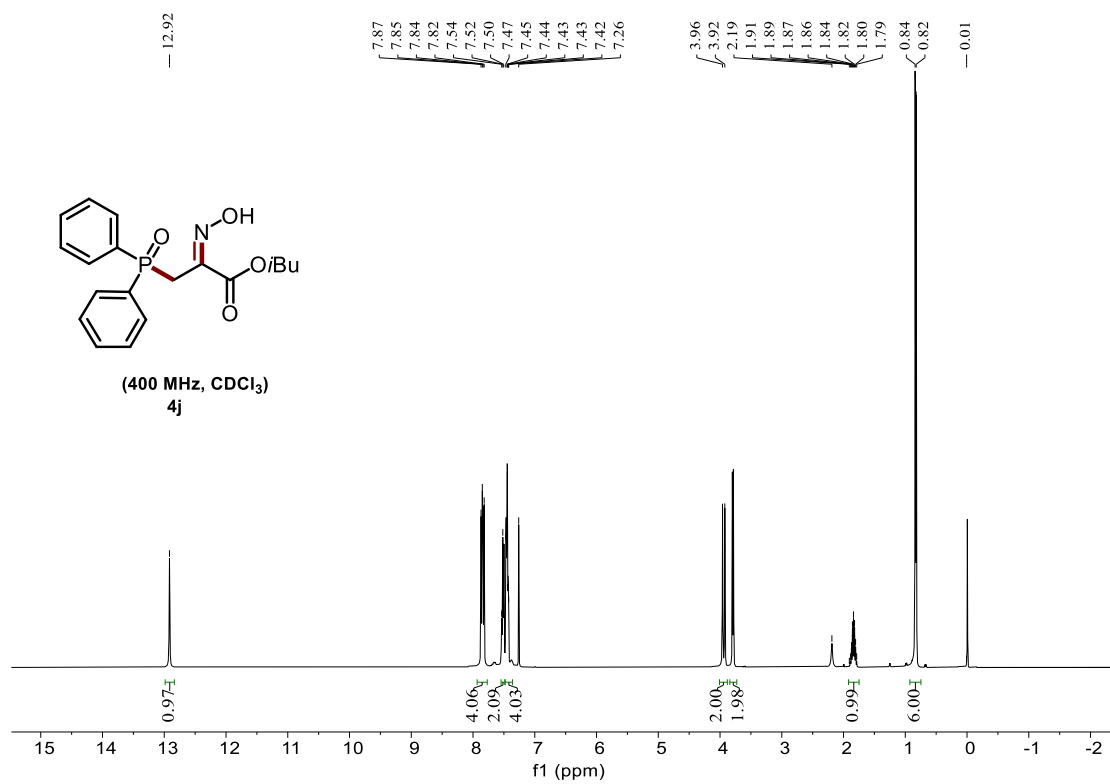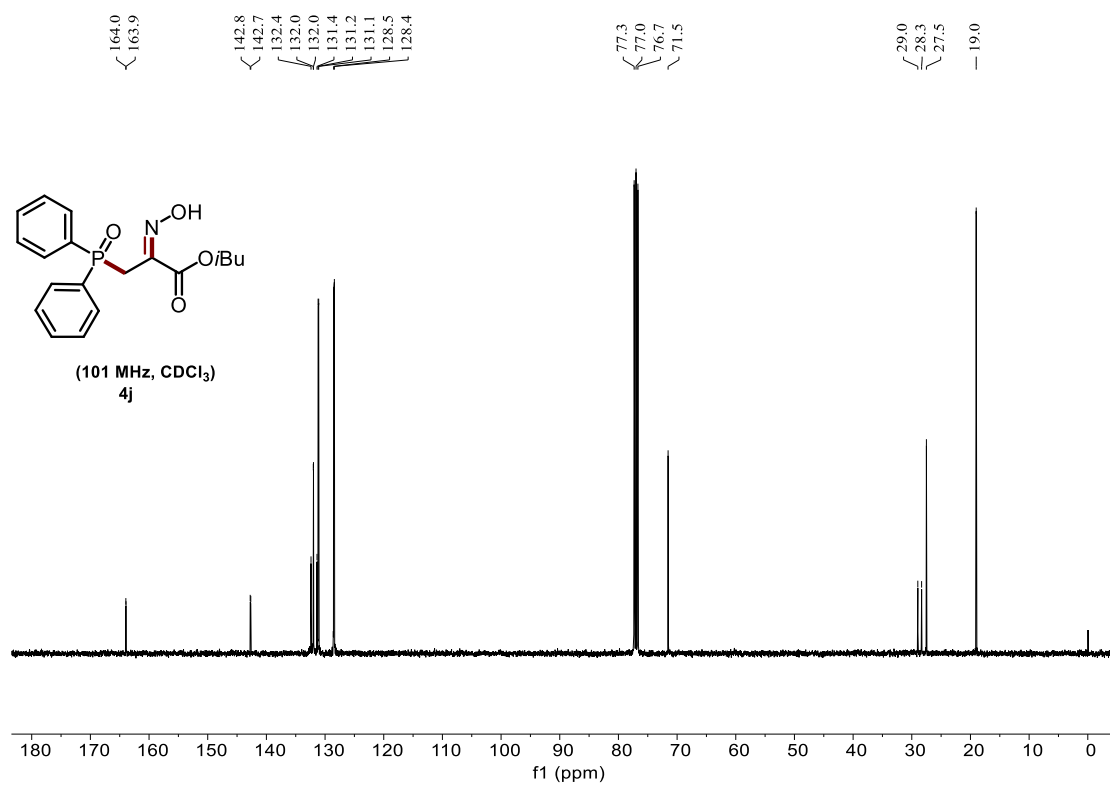



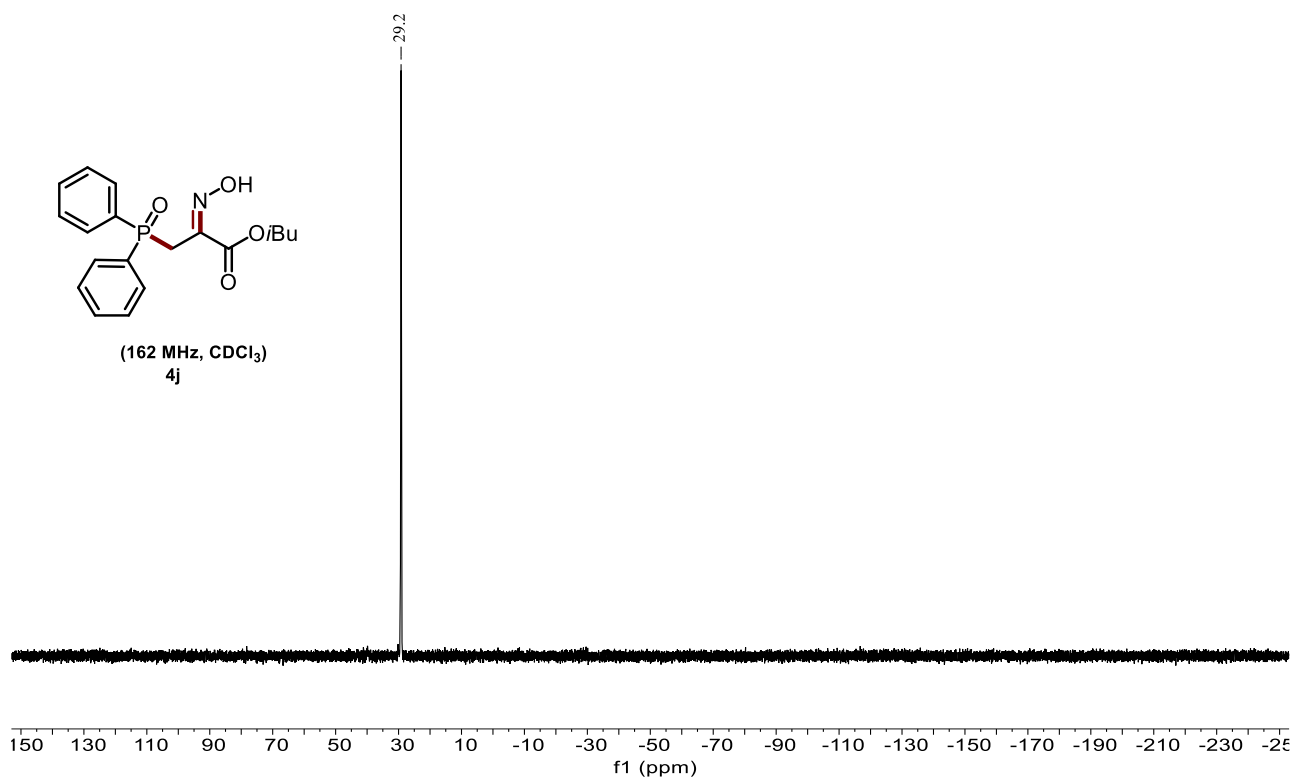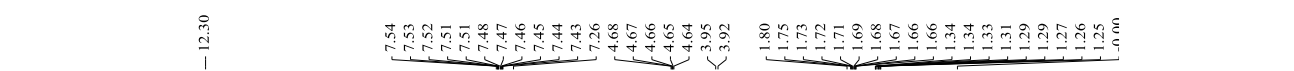

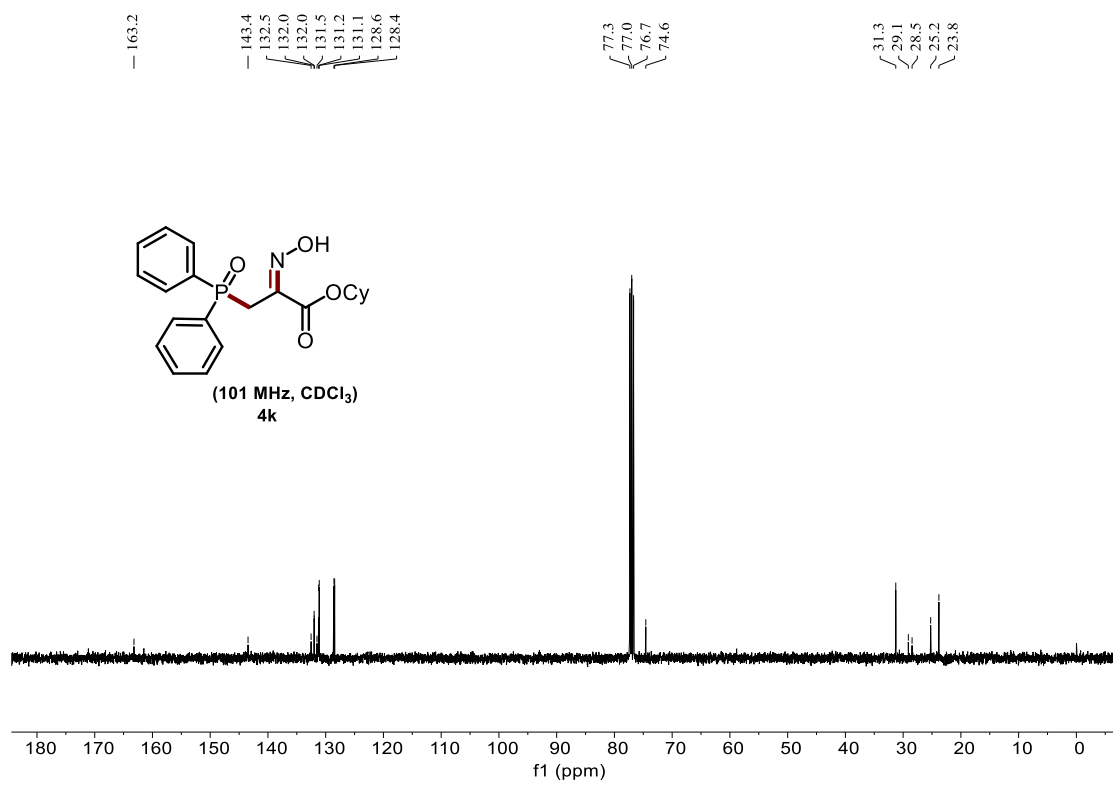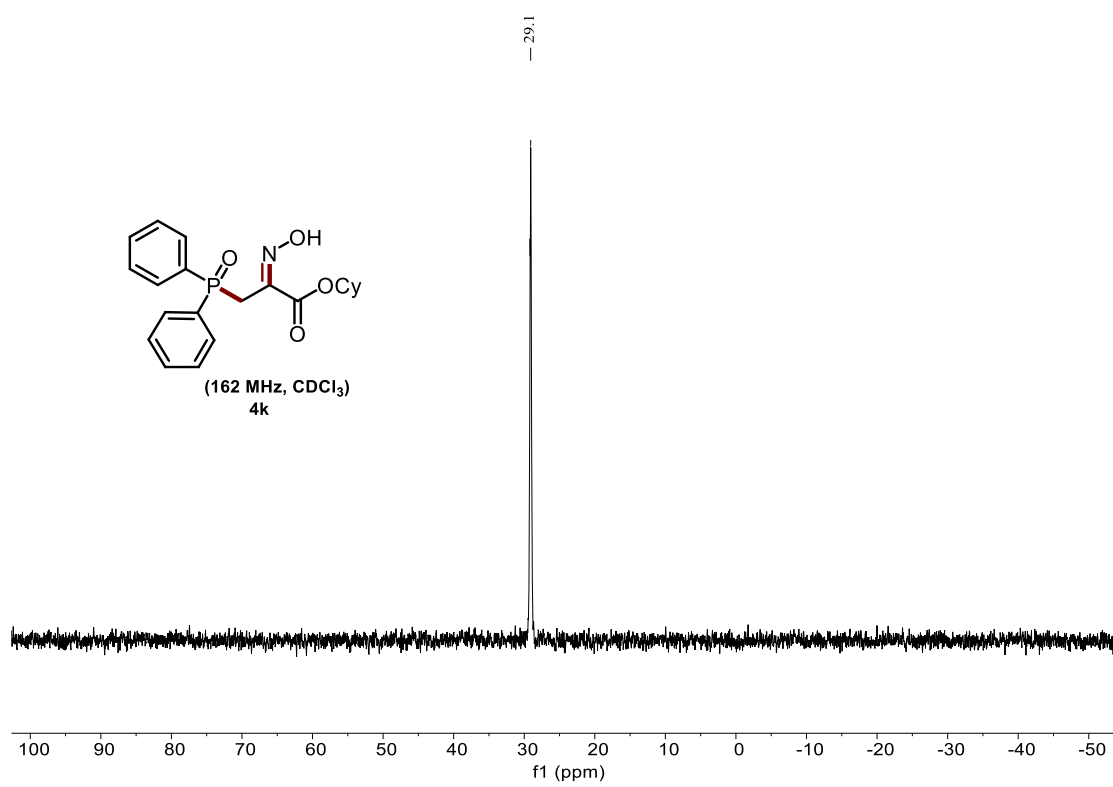

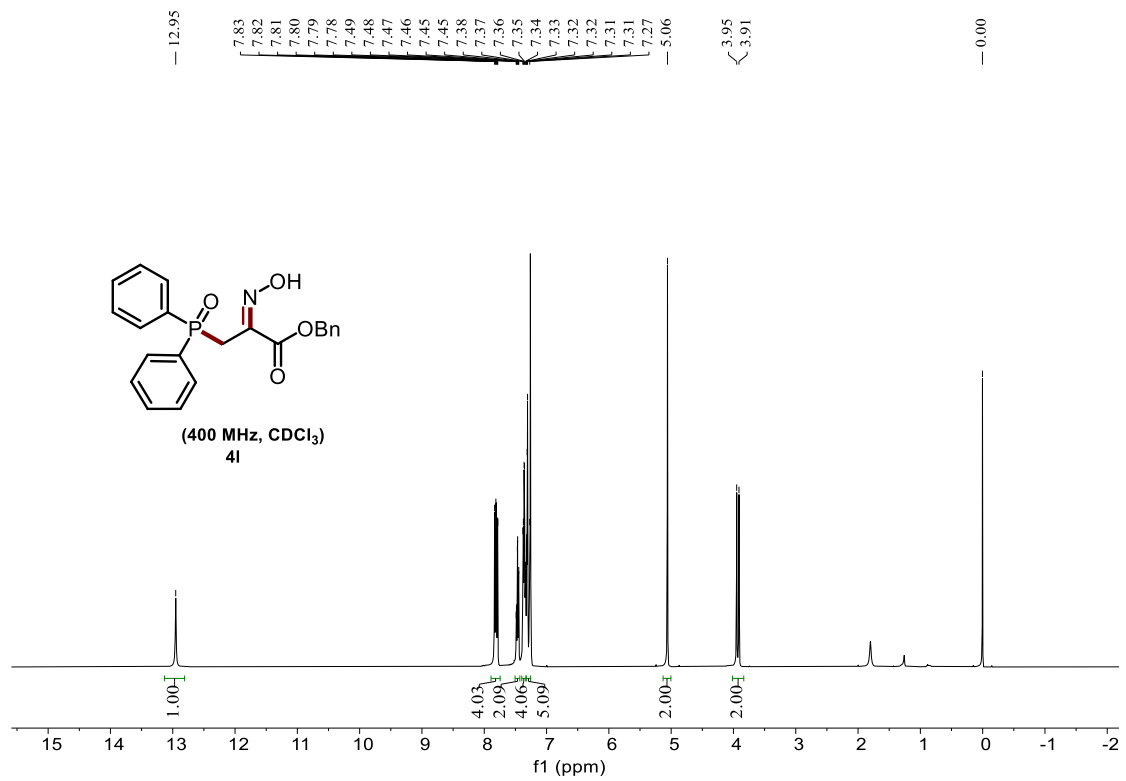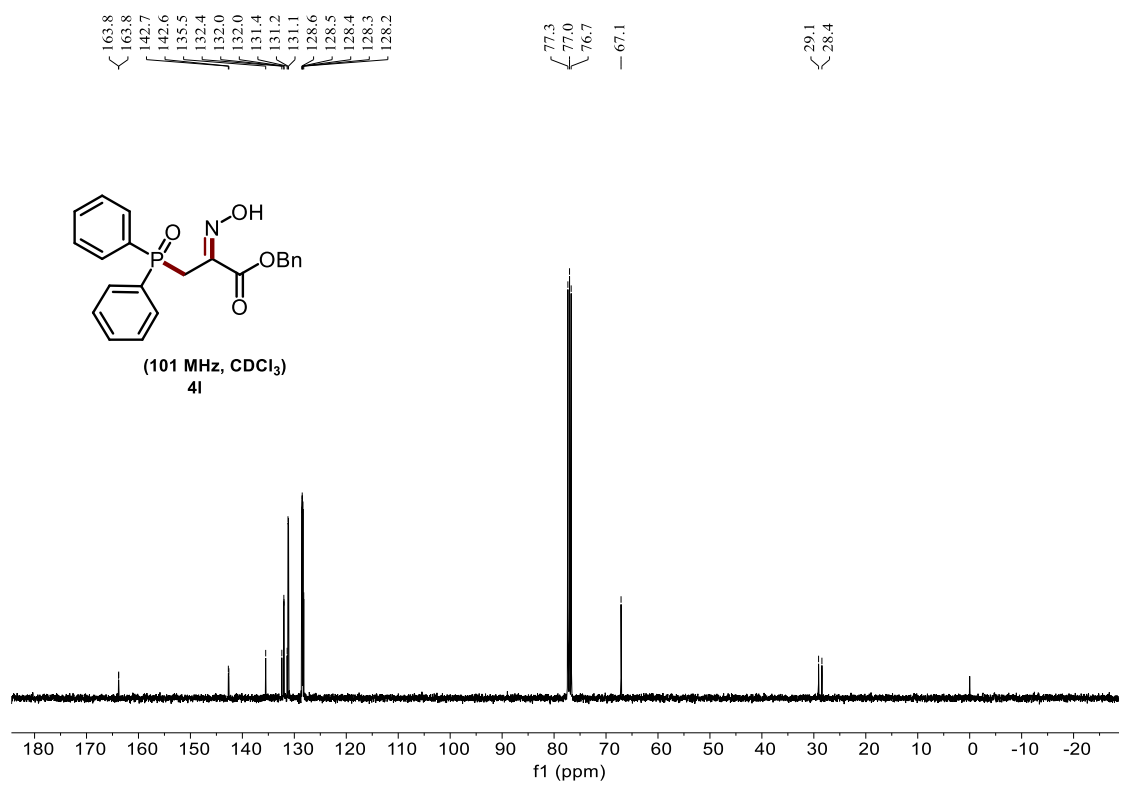

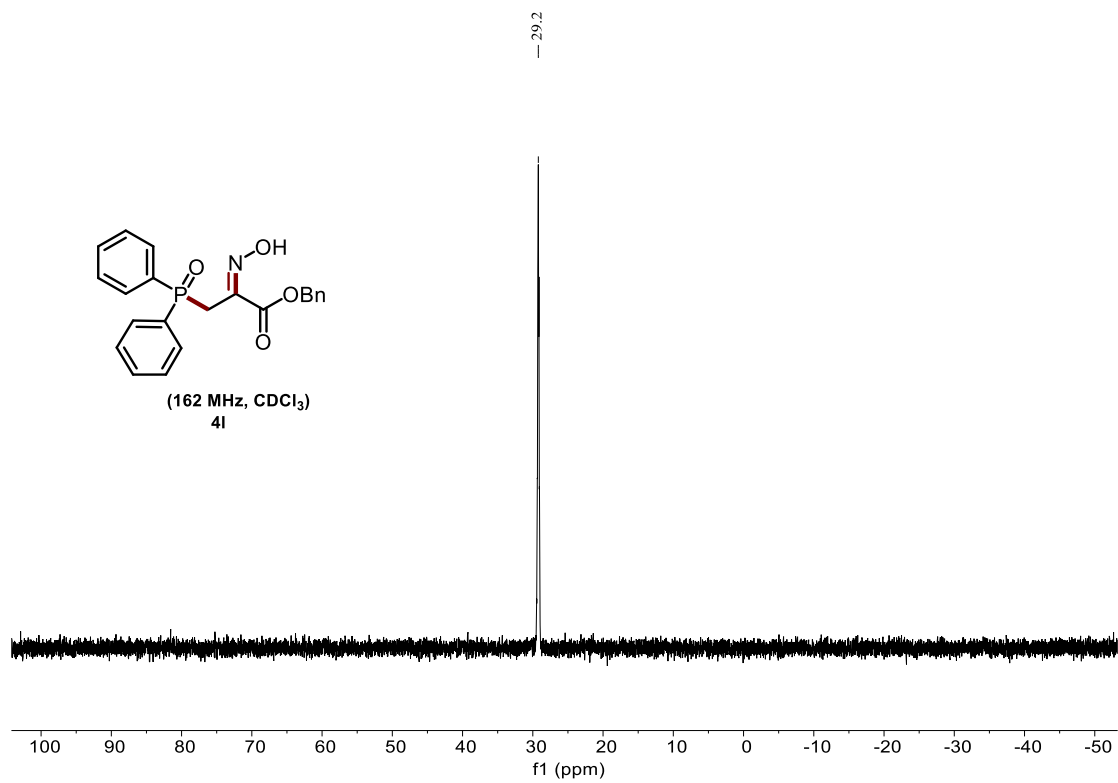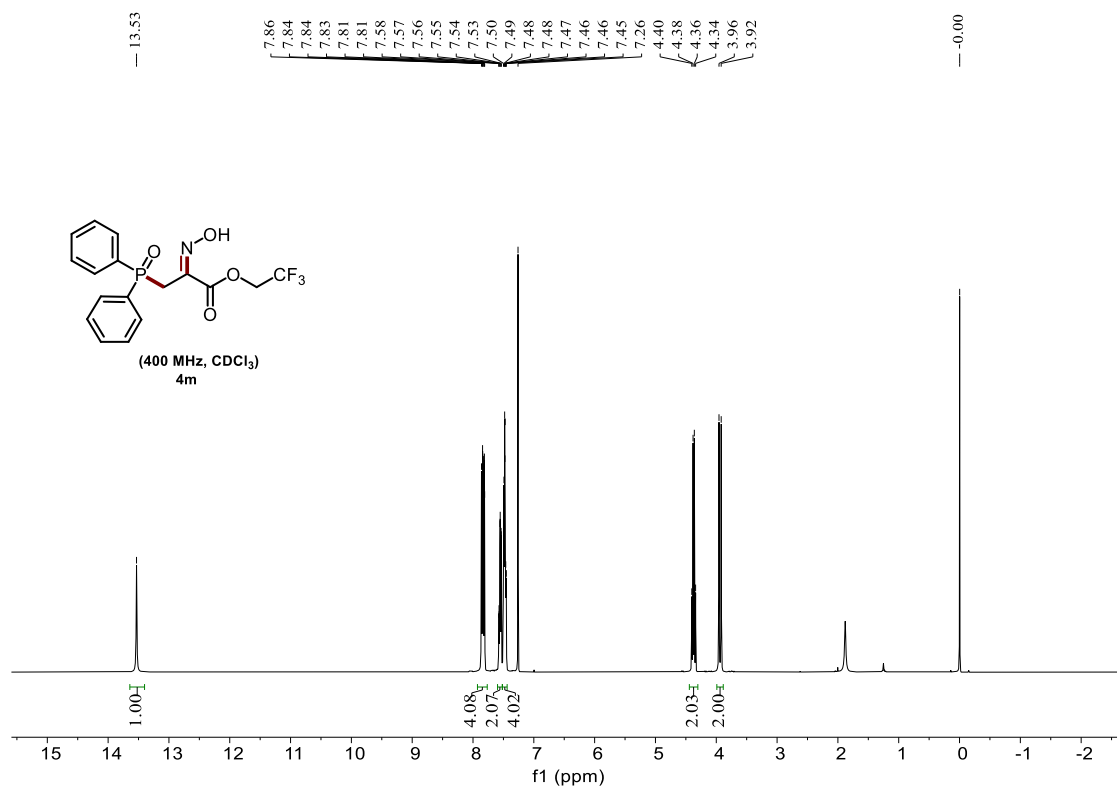

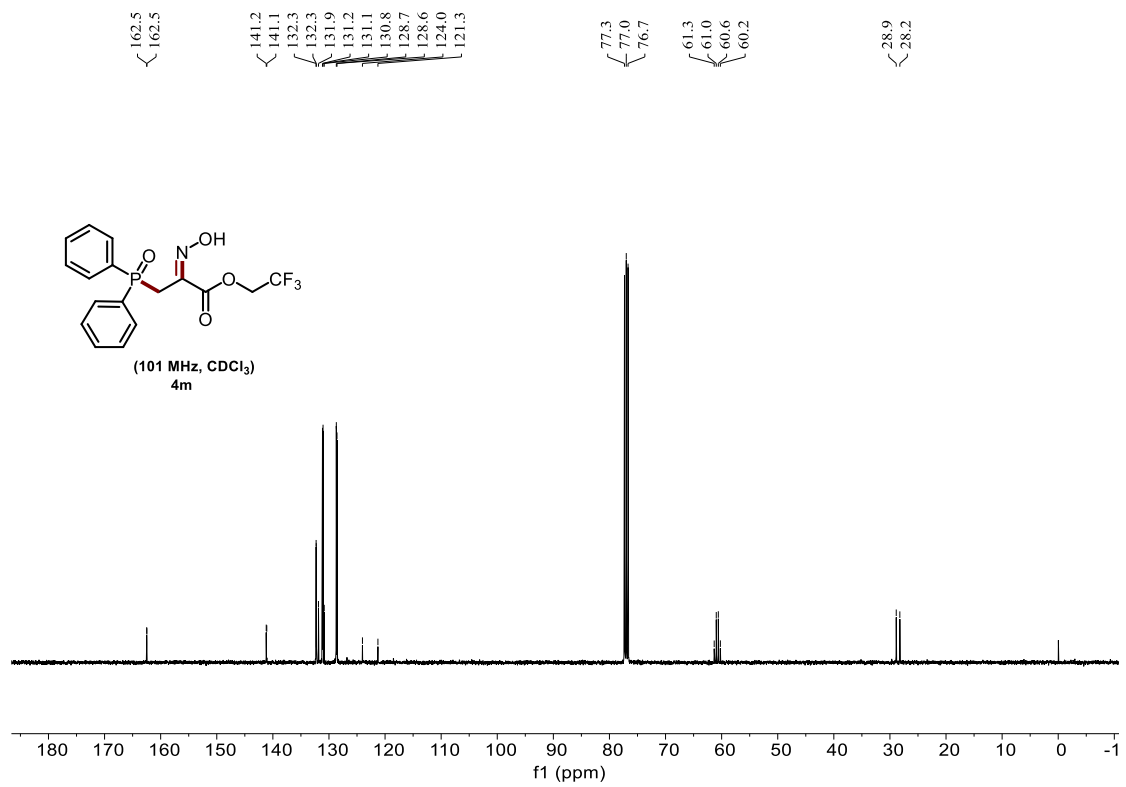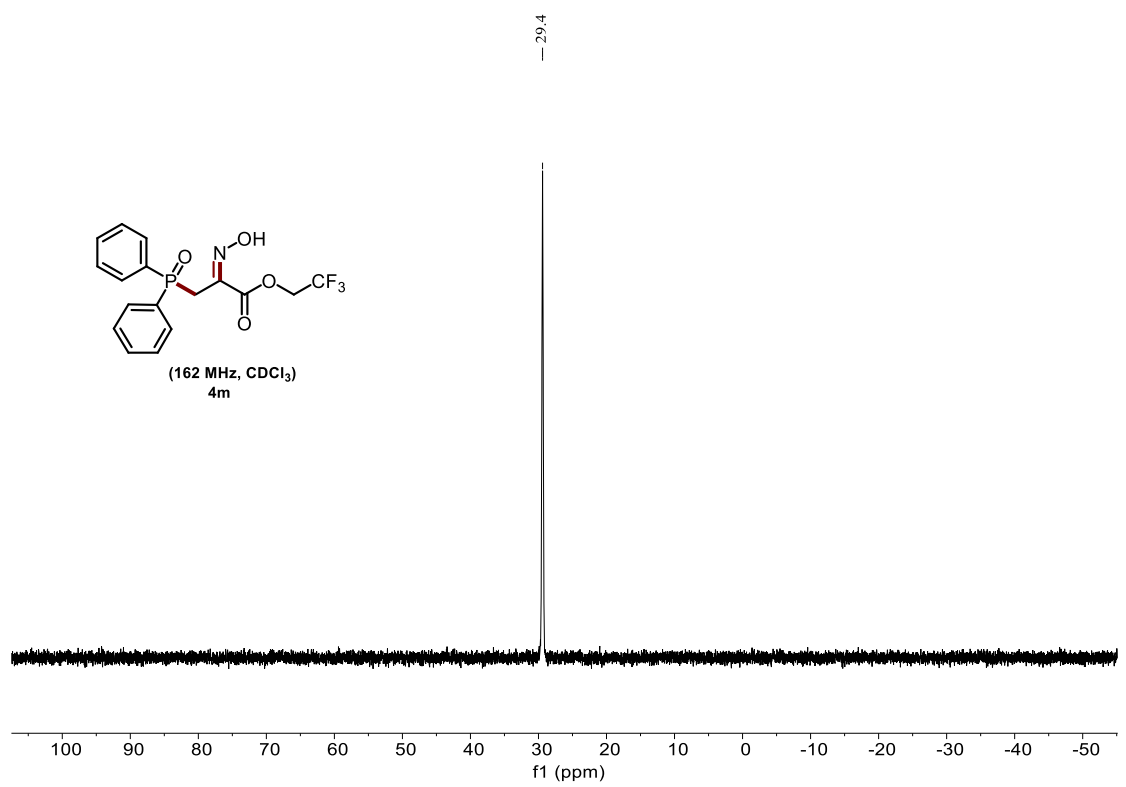

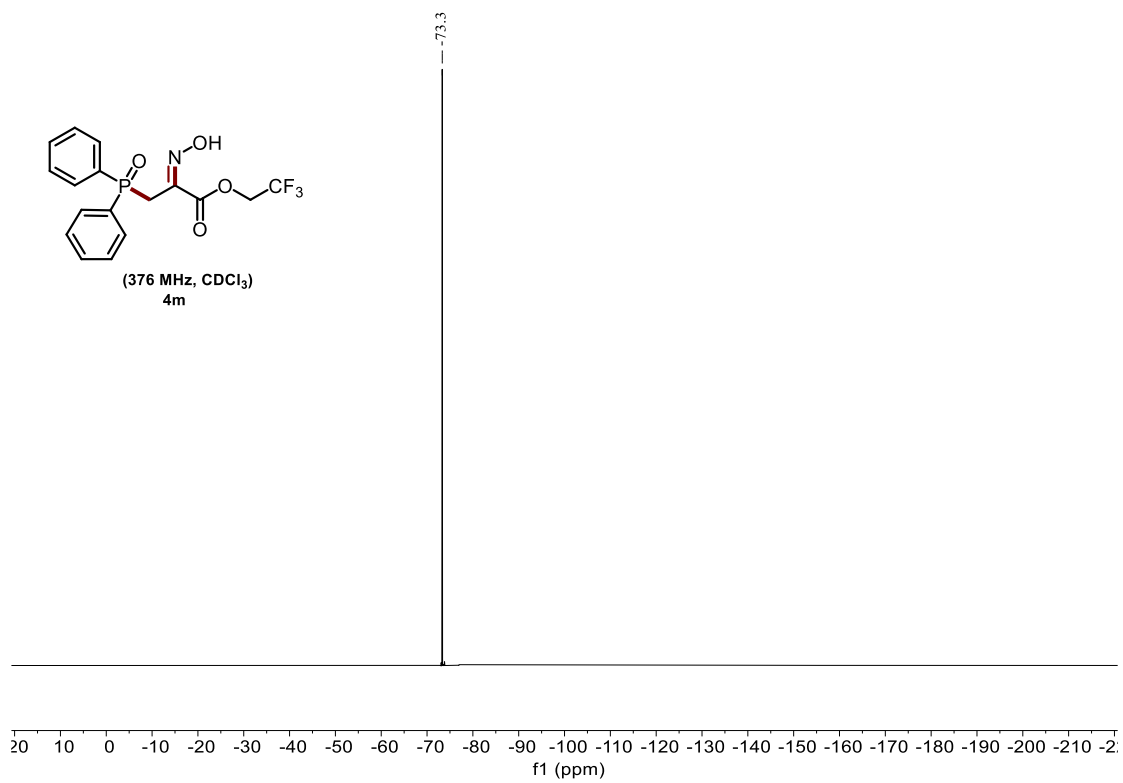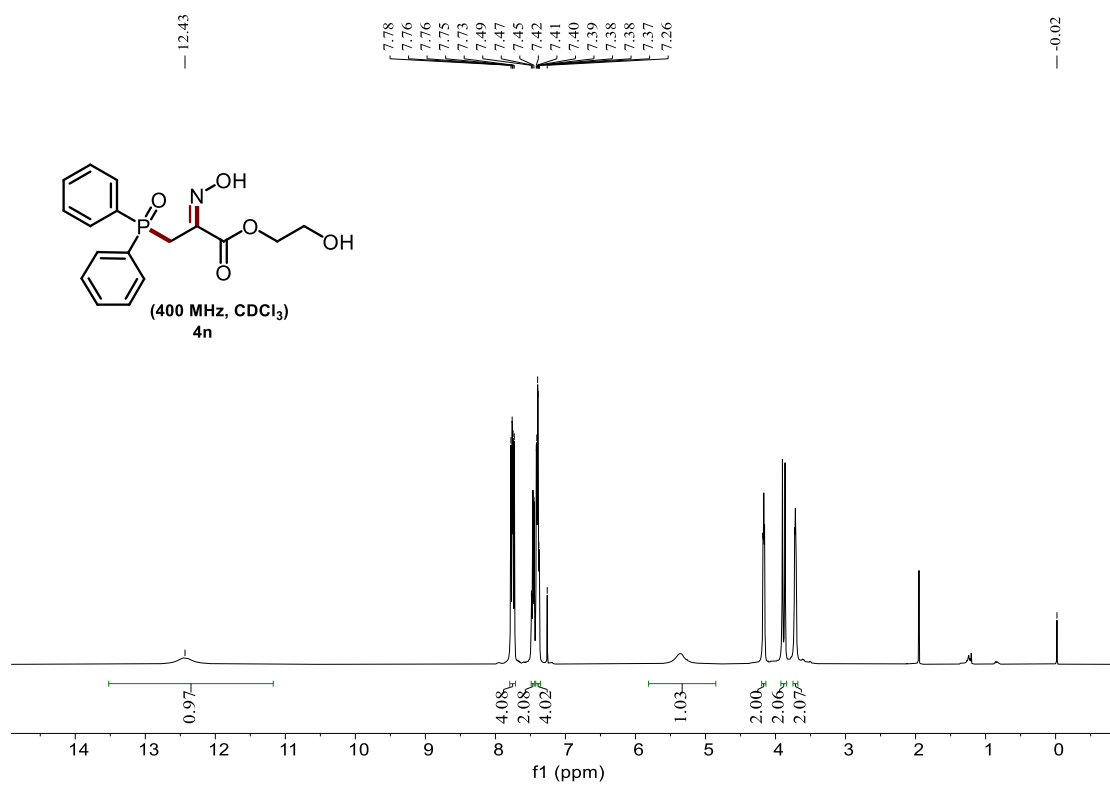

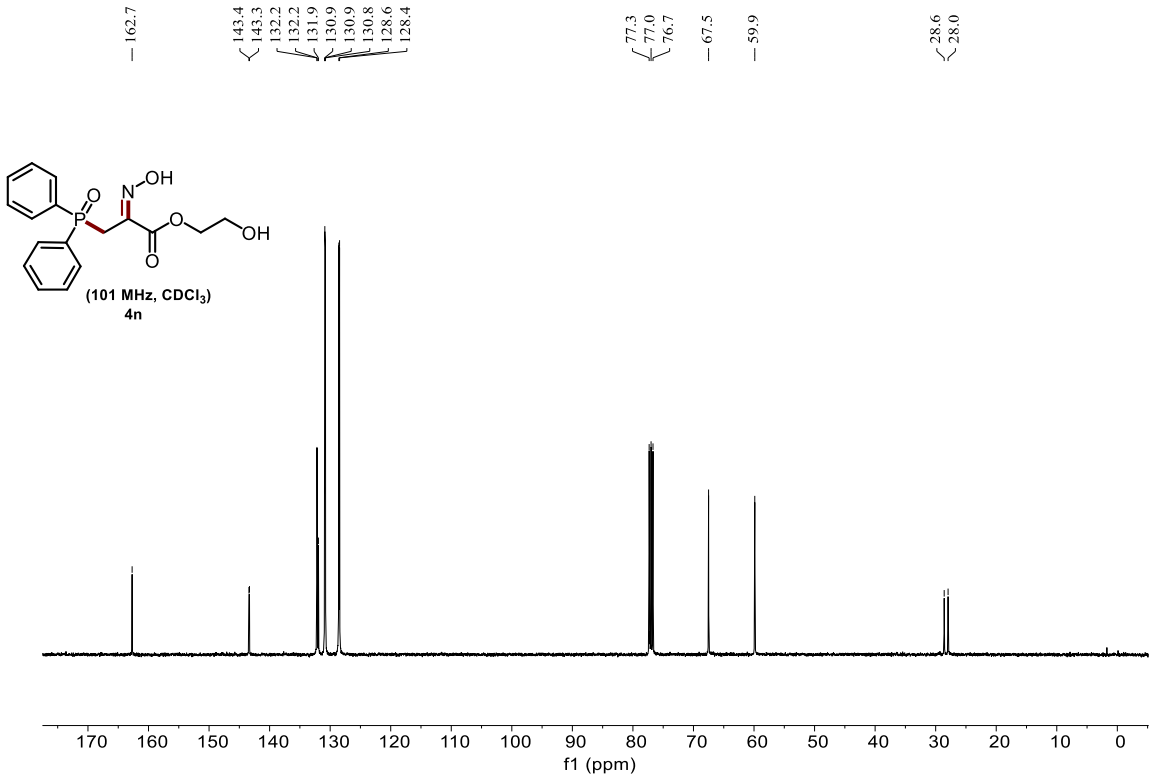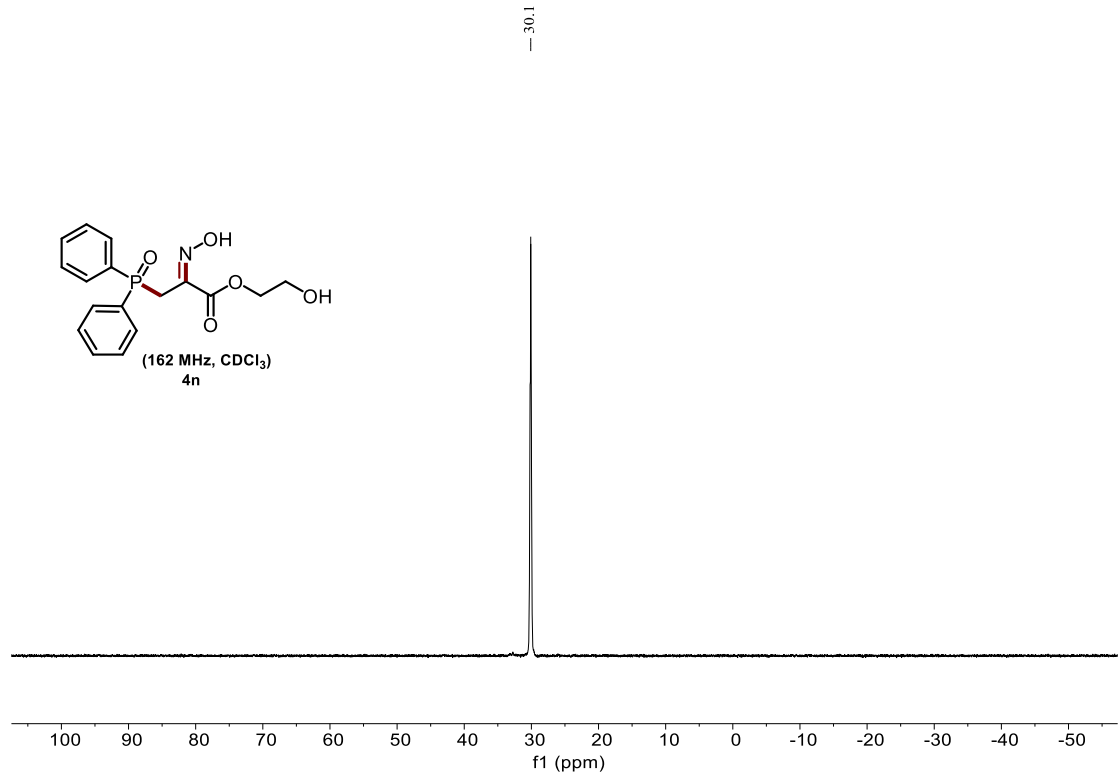

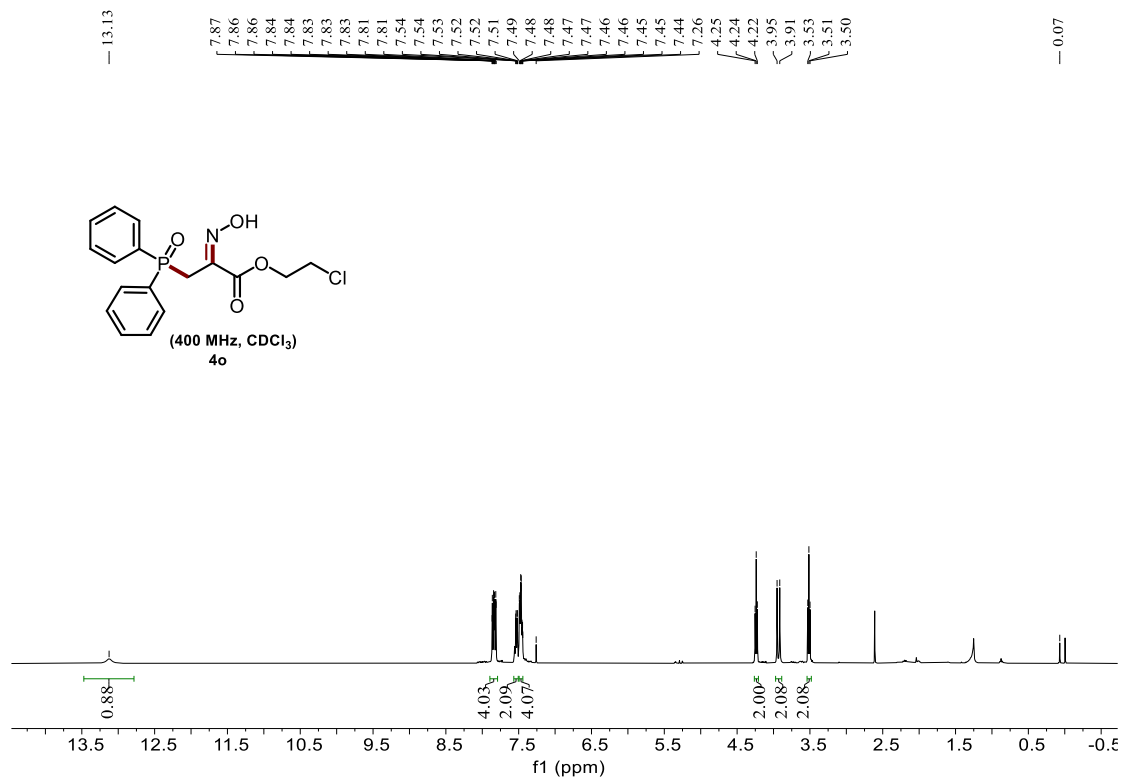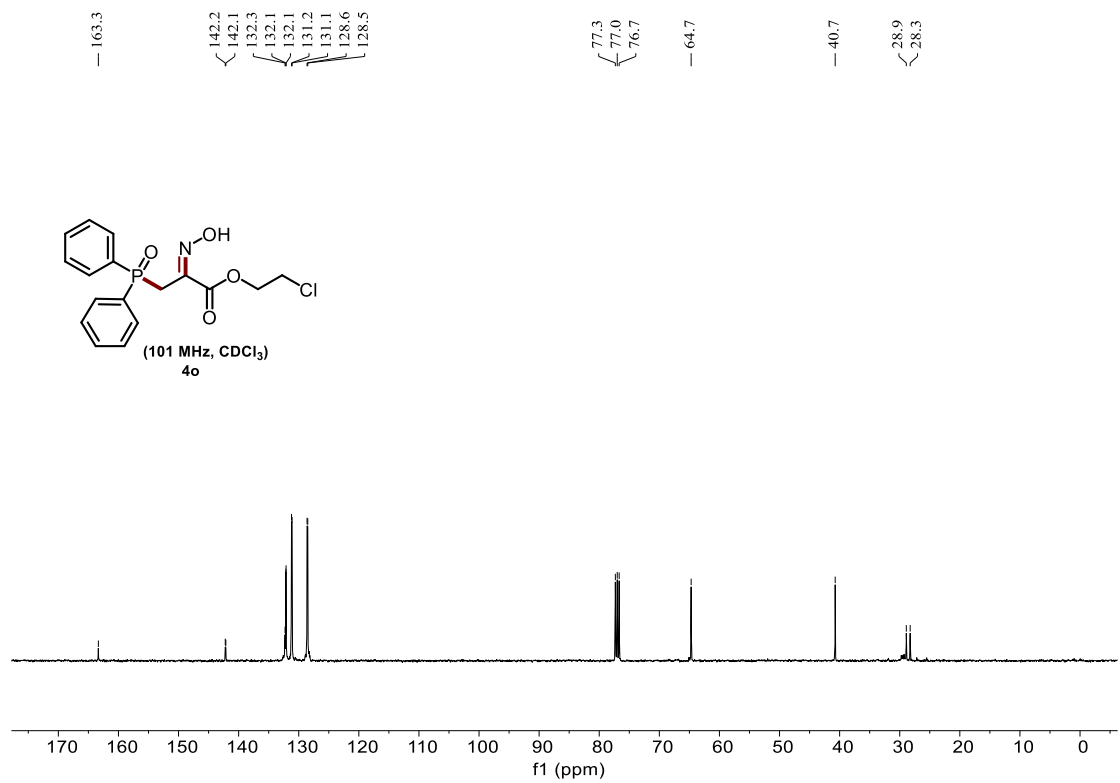



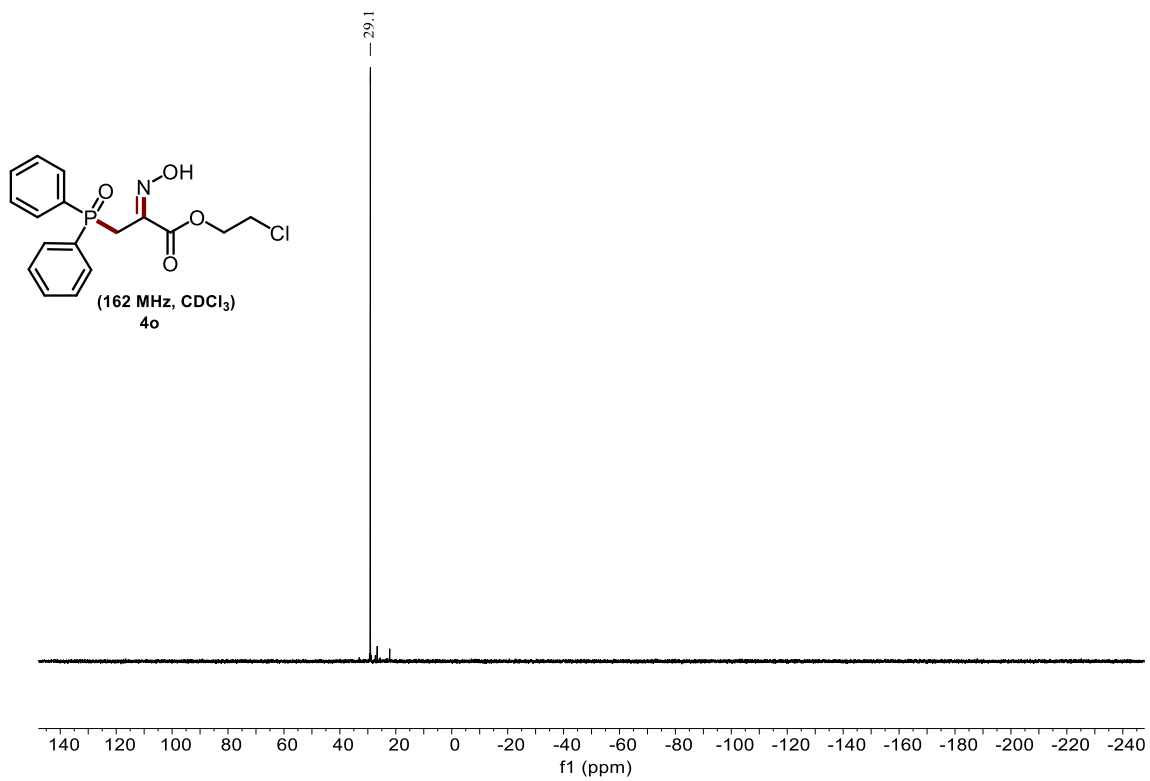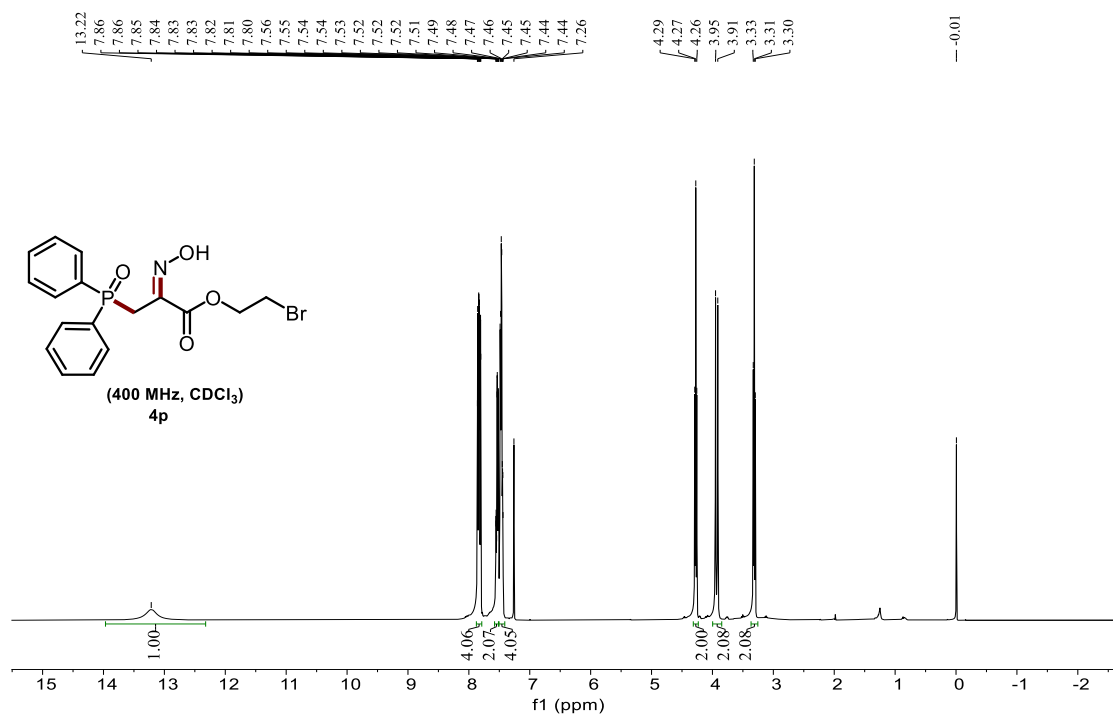

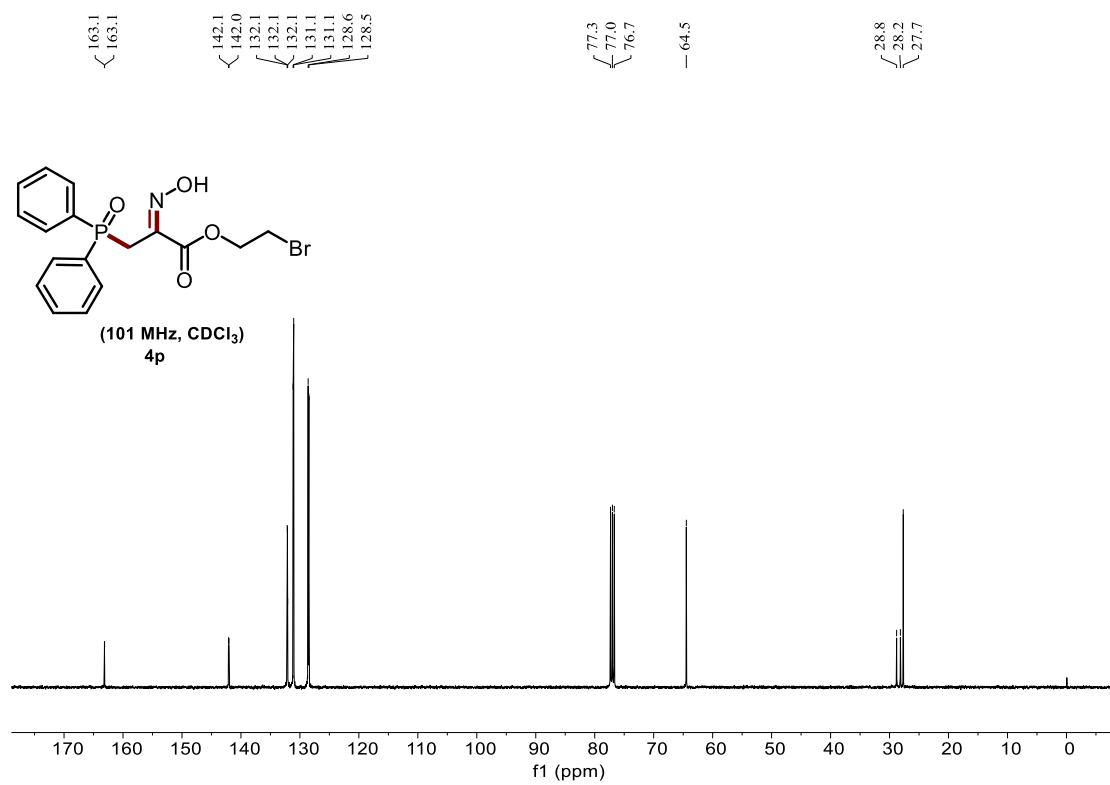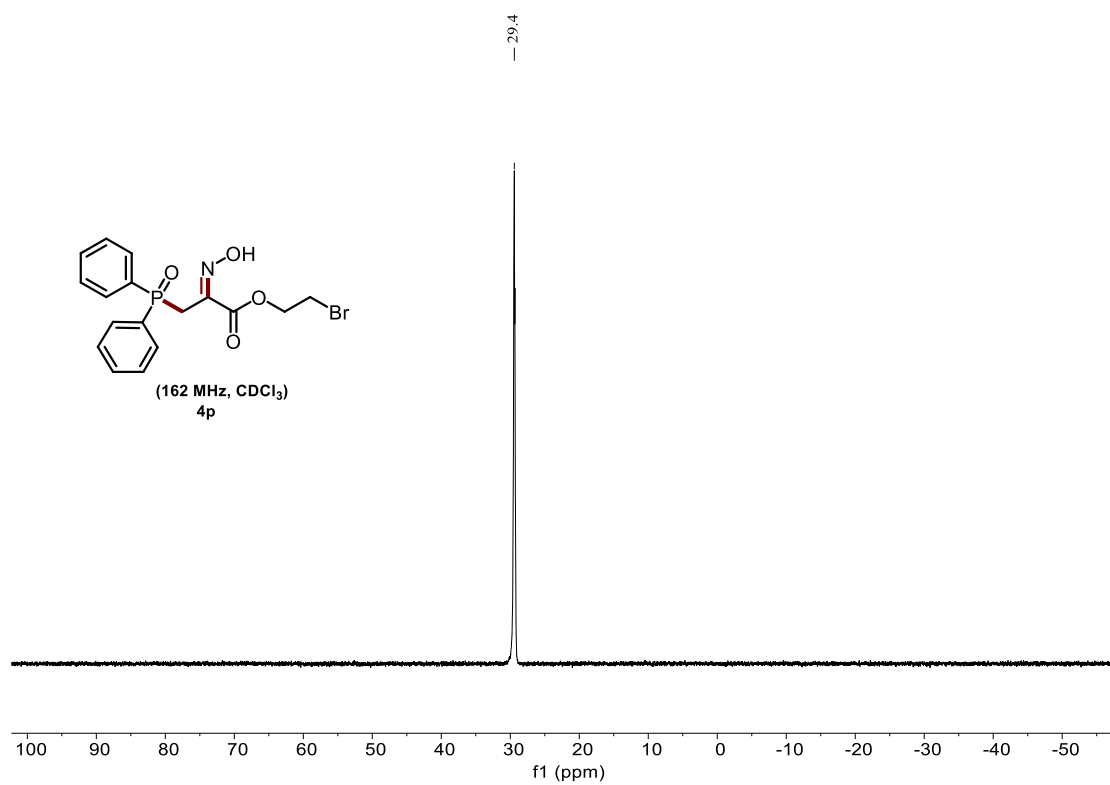

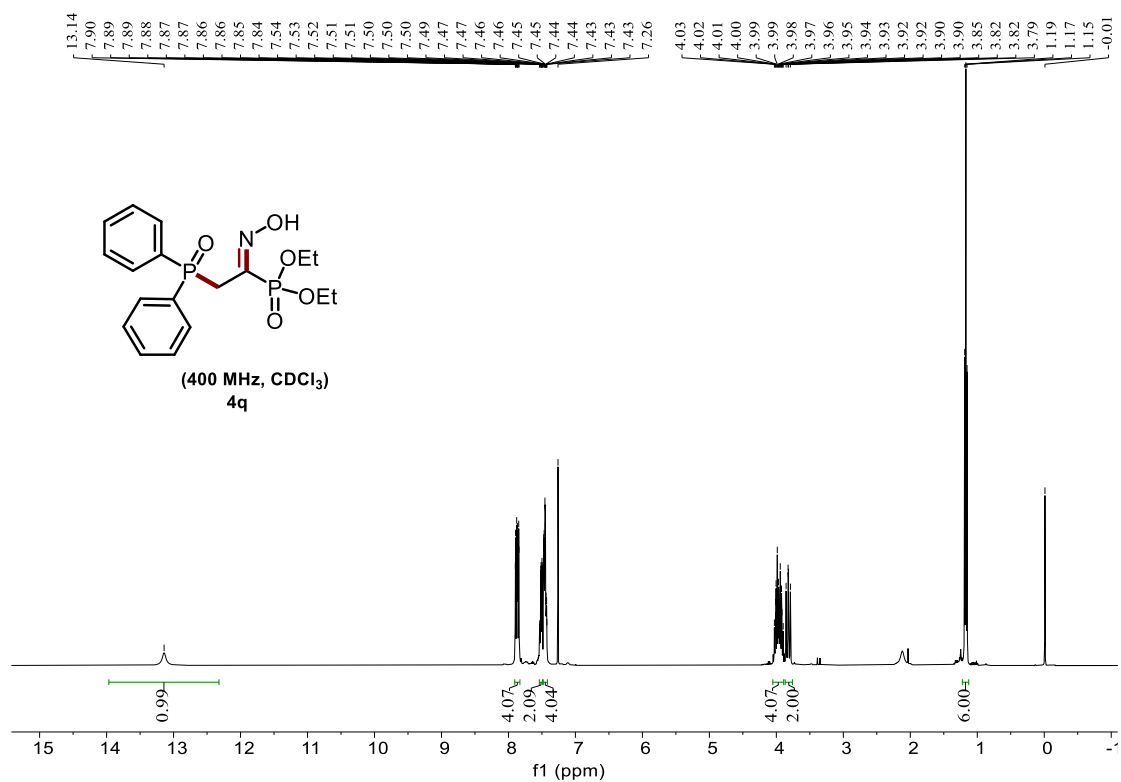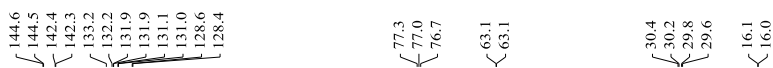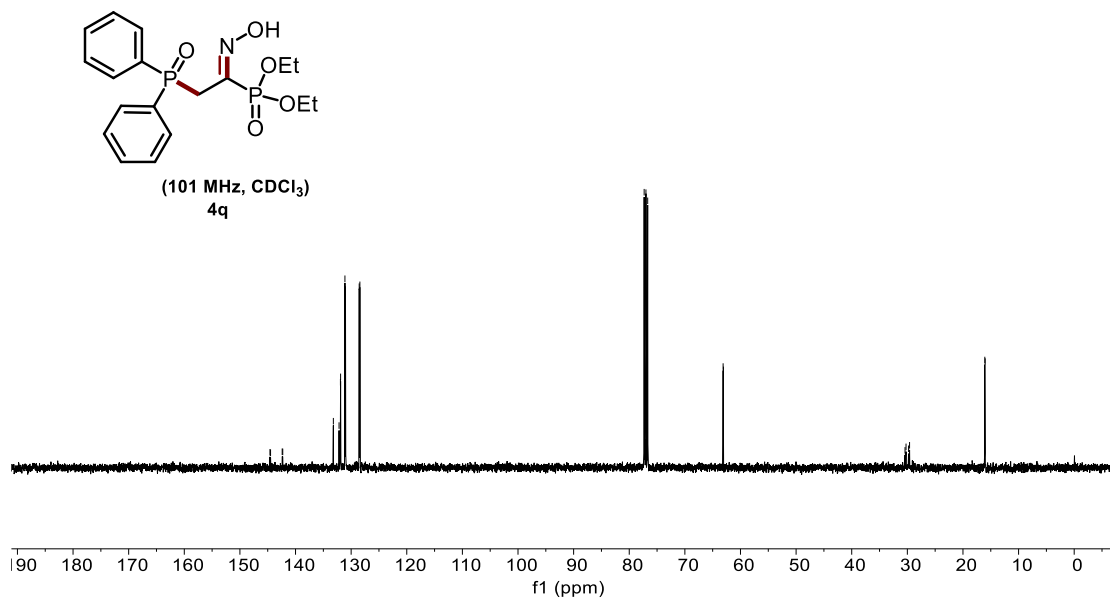

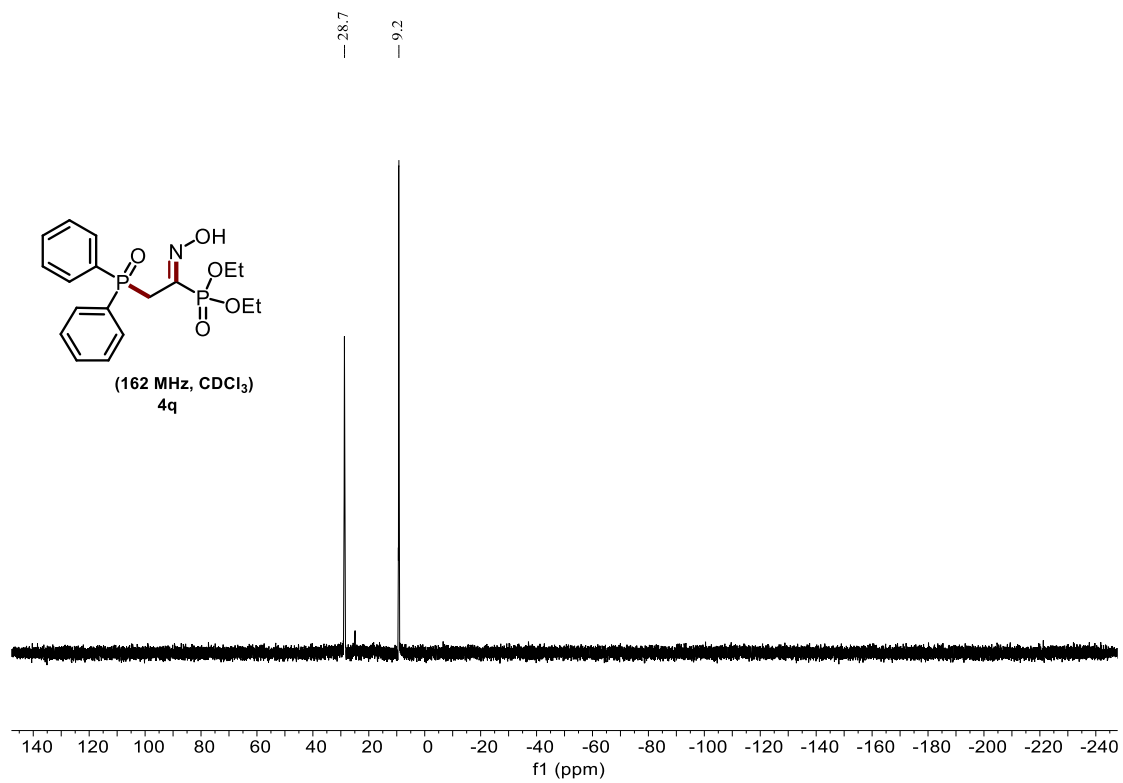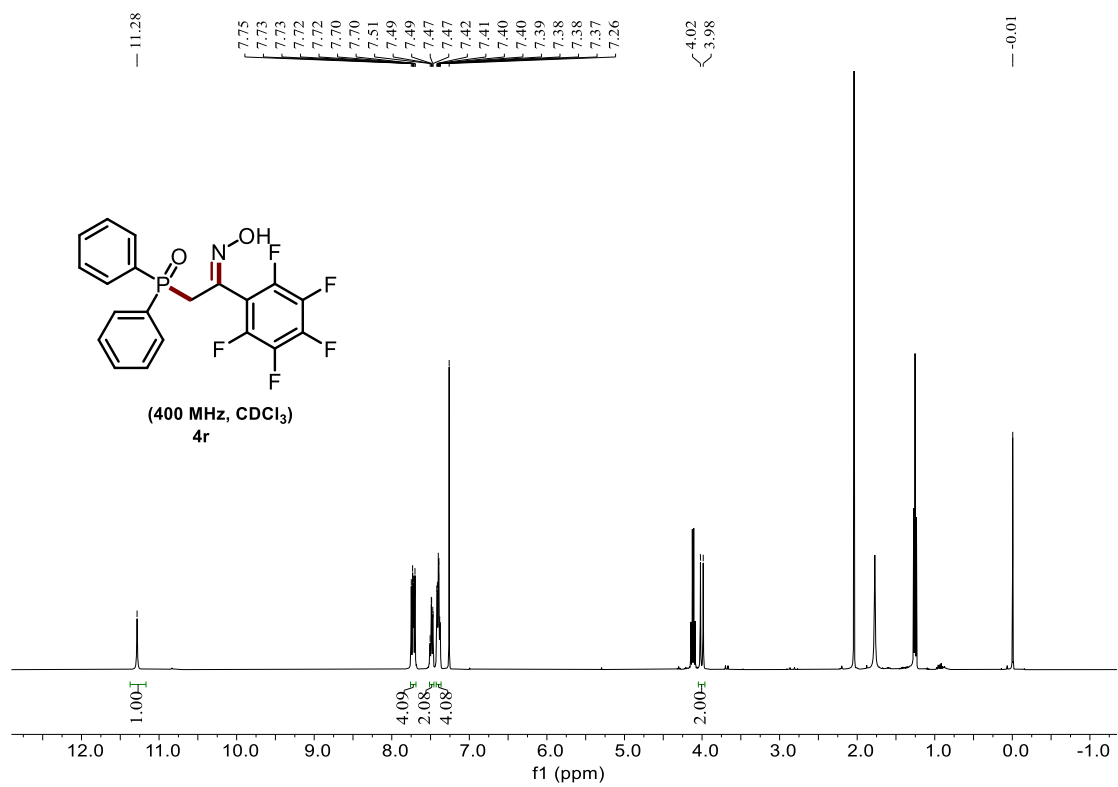

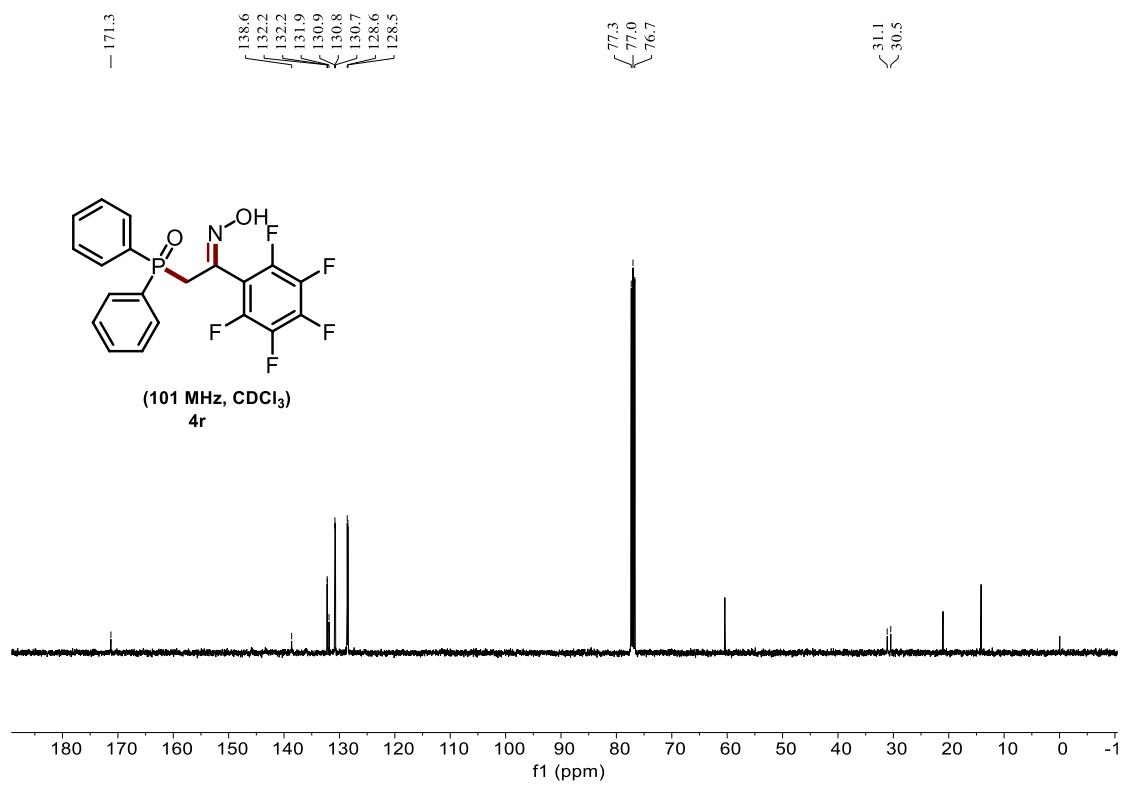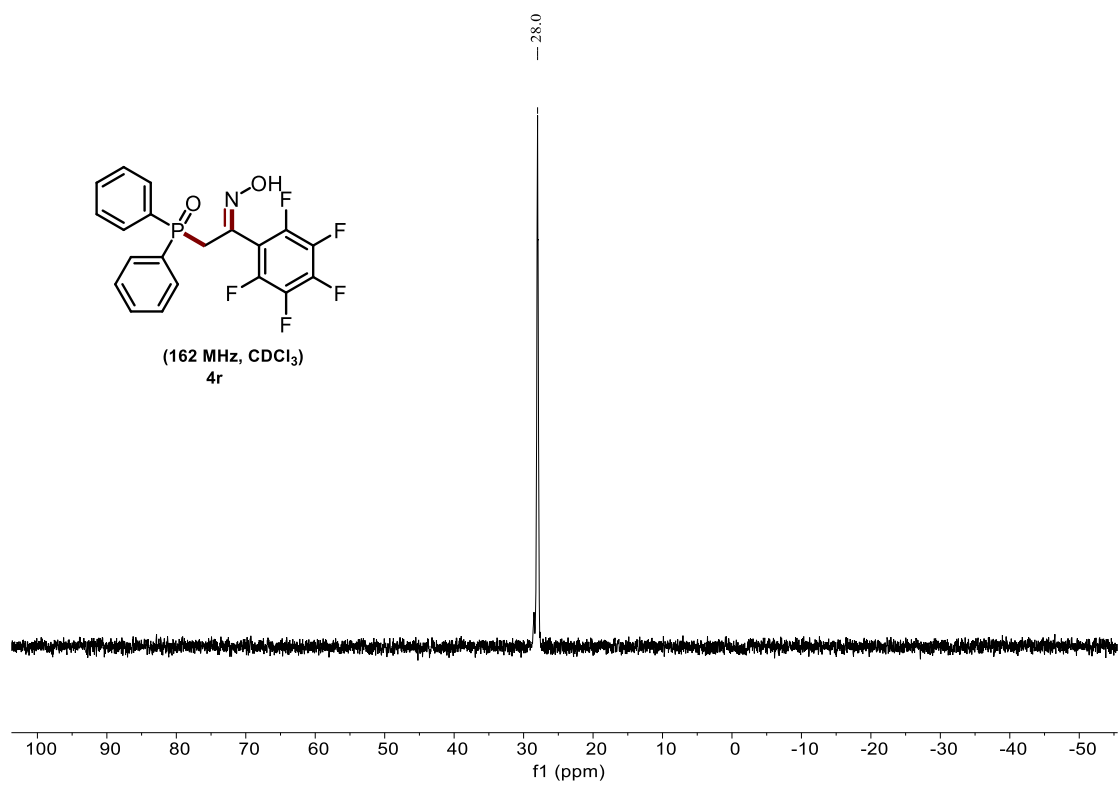

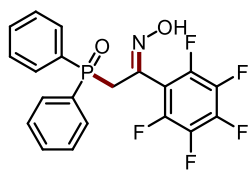

(376 MHz, CDCl<sub>3</sub>)  
4r

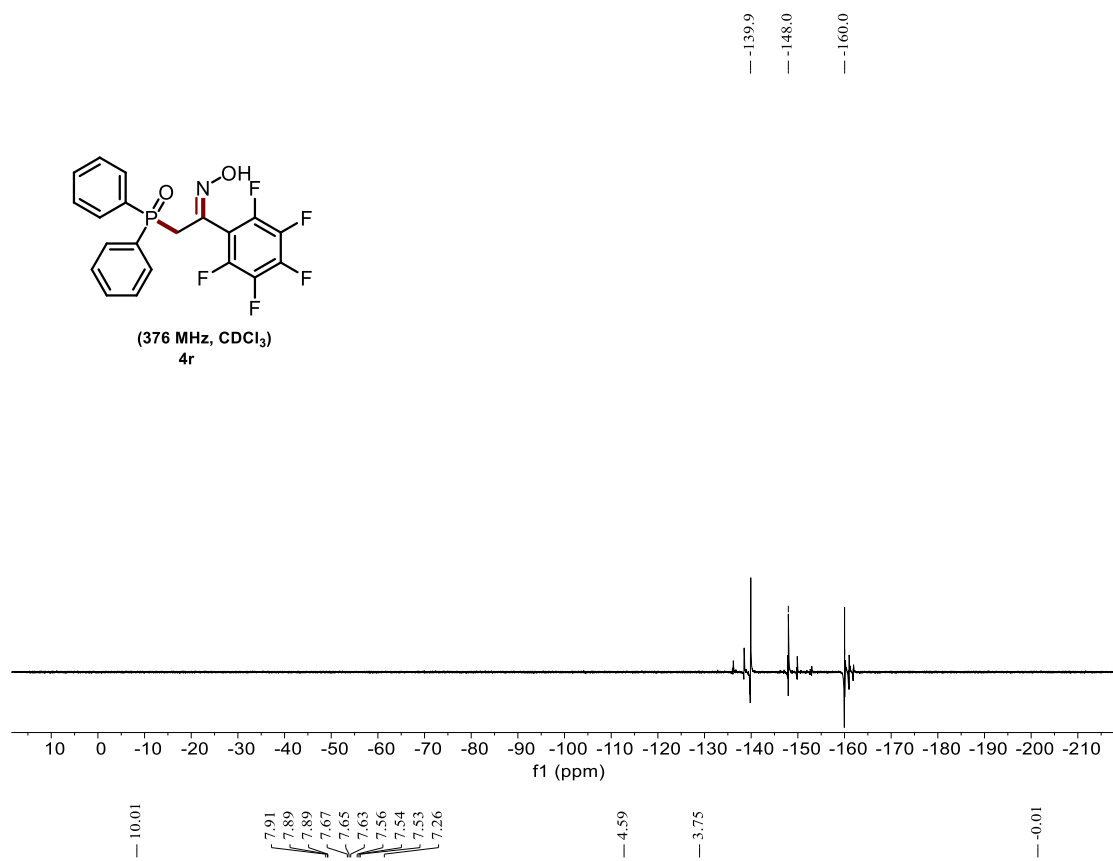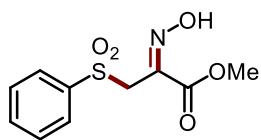

(400 MHz, CDCl<sub>3</sub>)  
6a

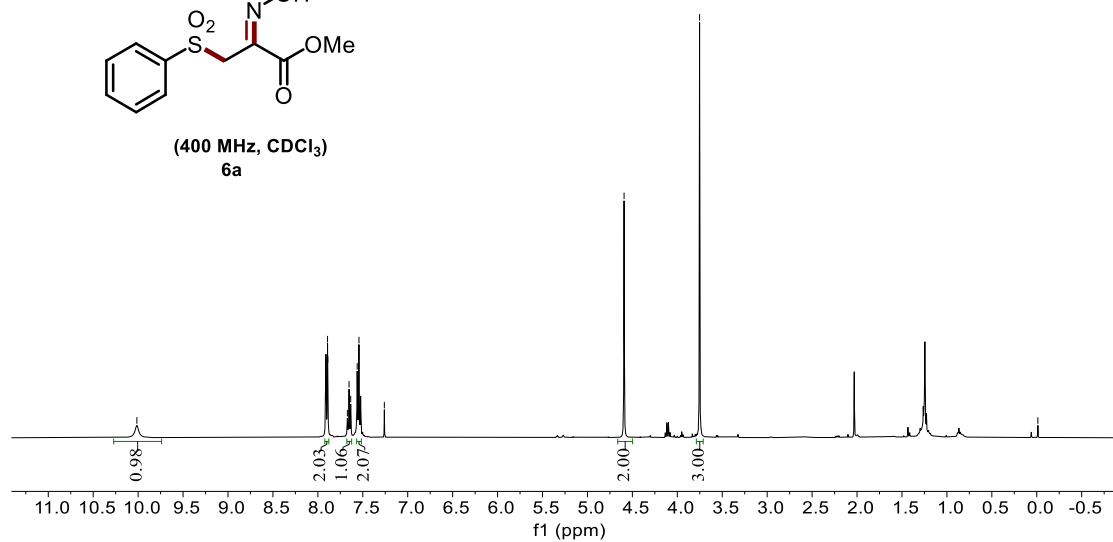

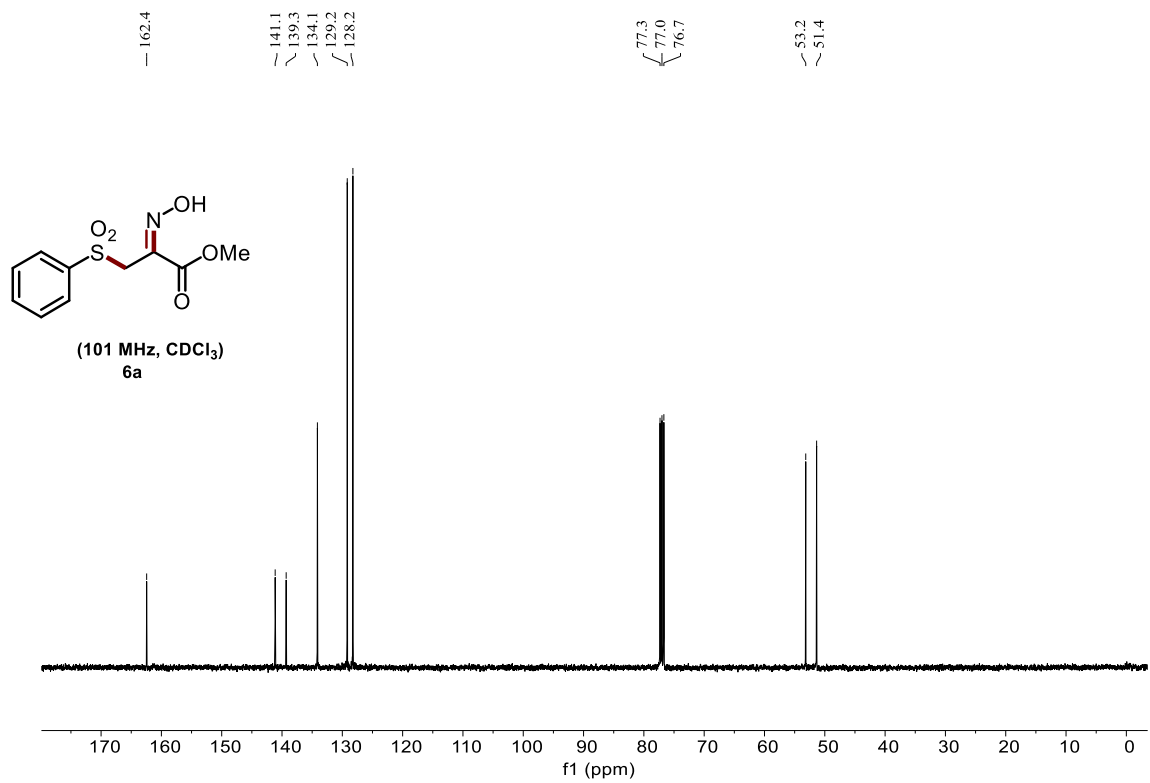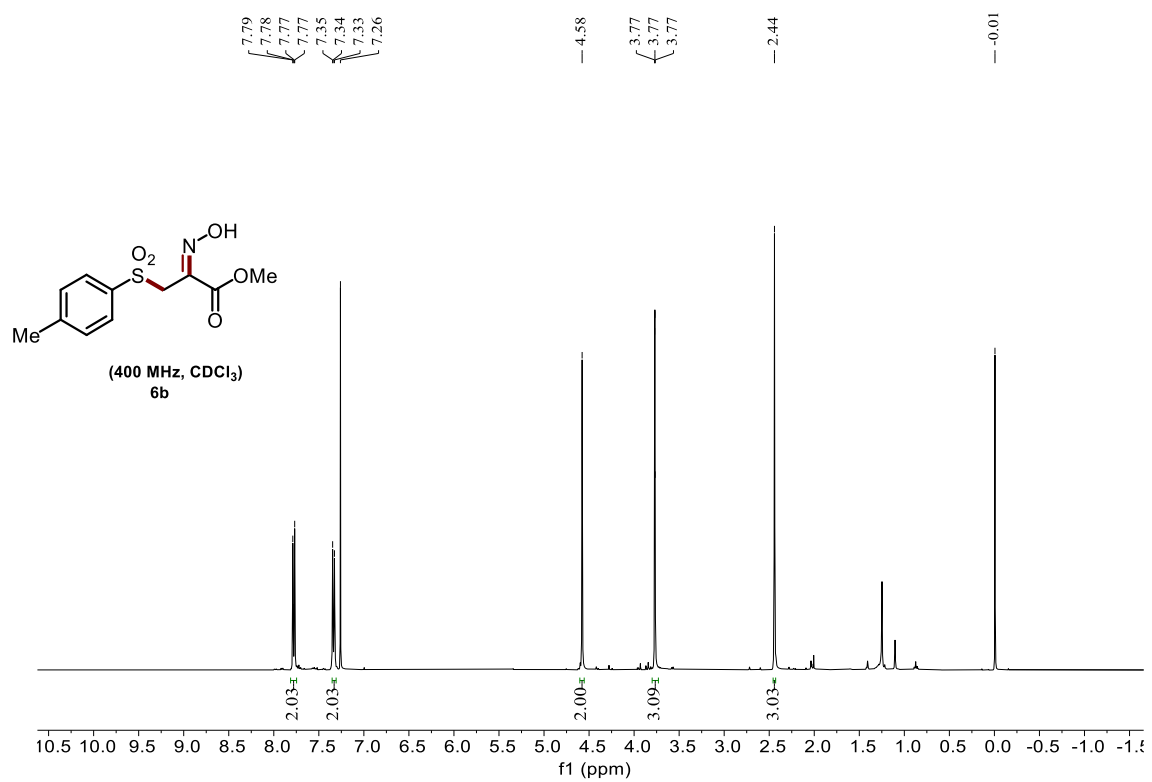

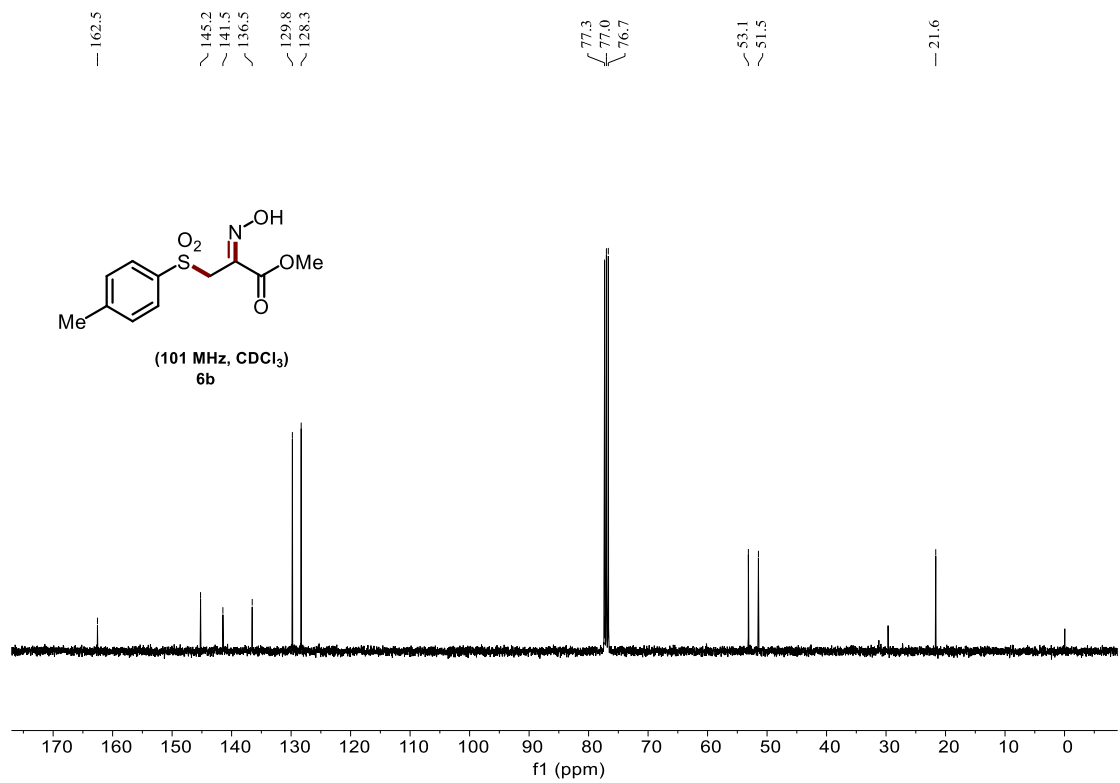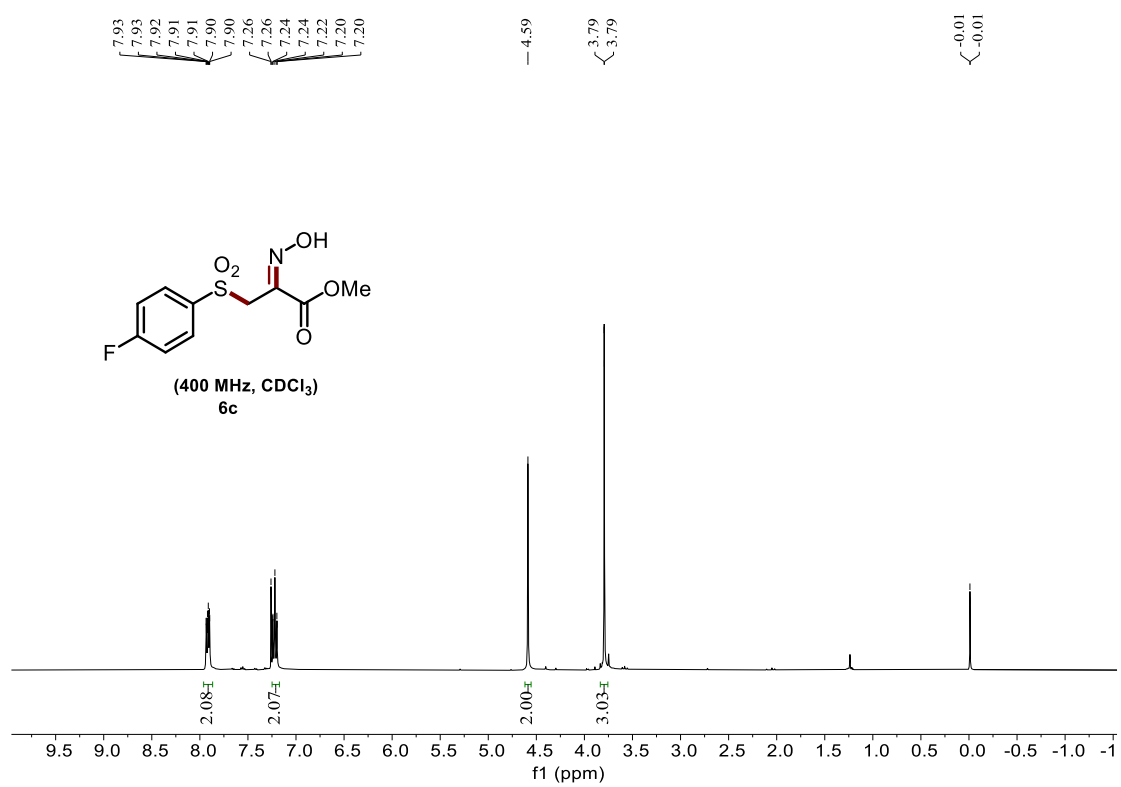



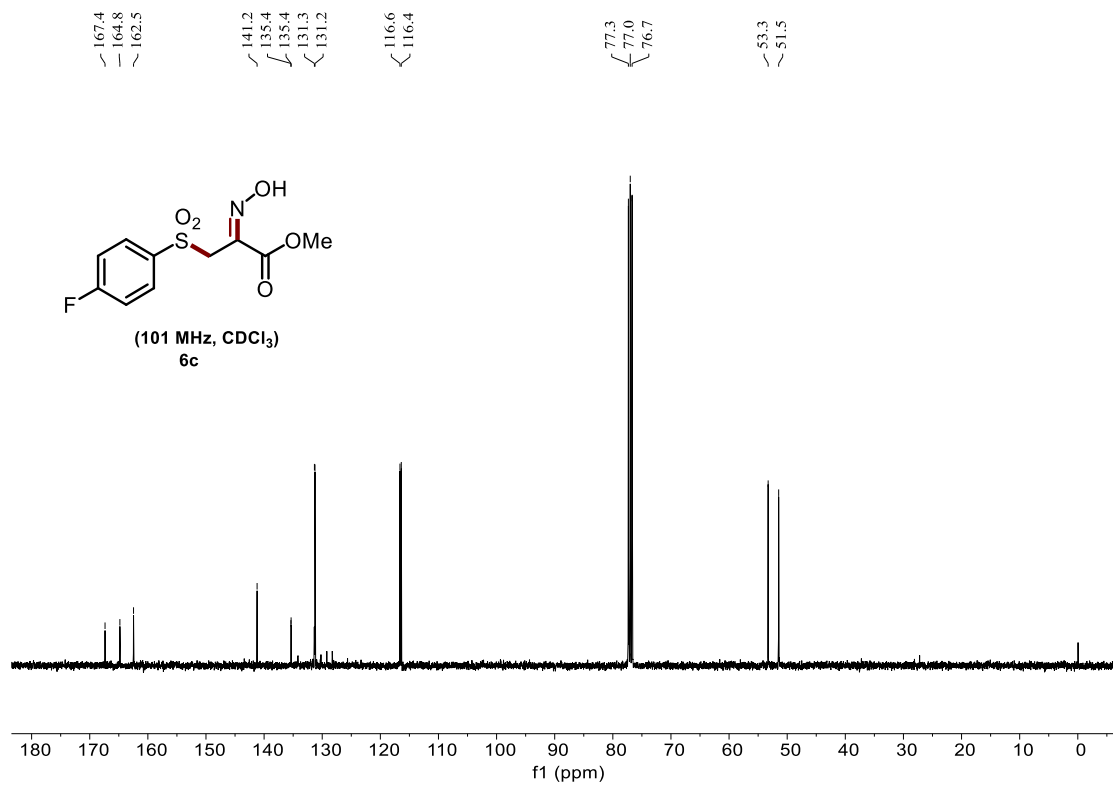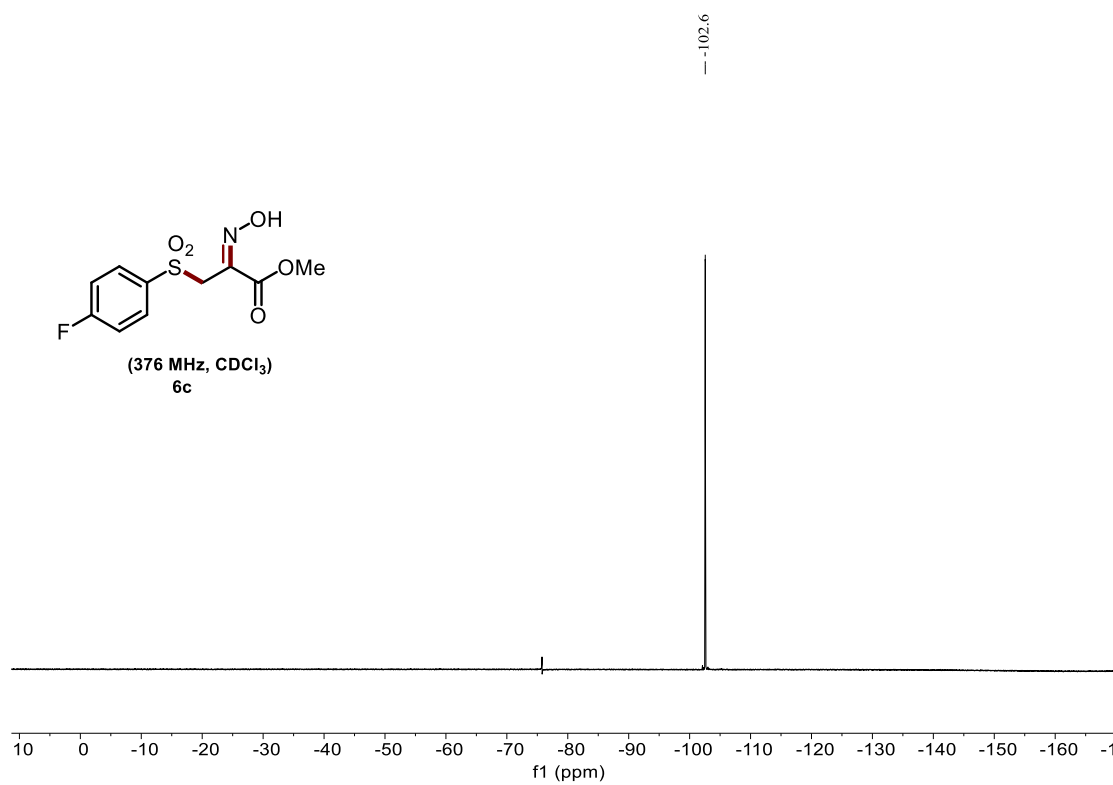

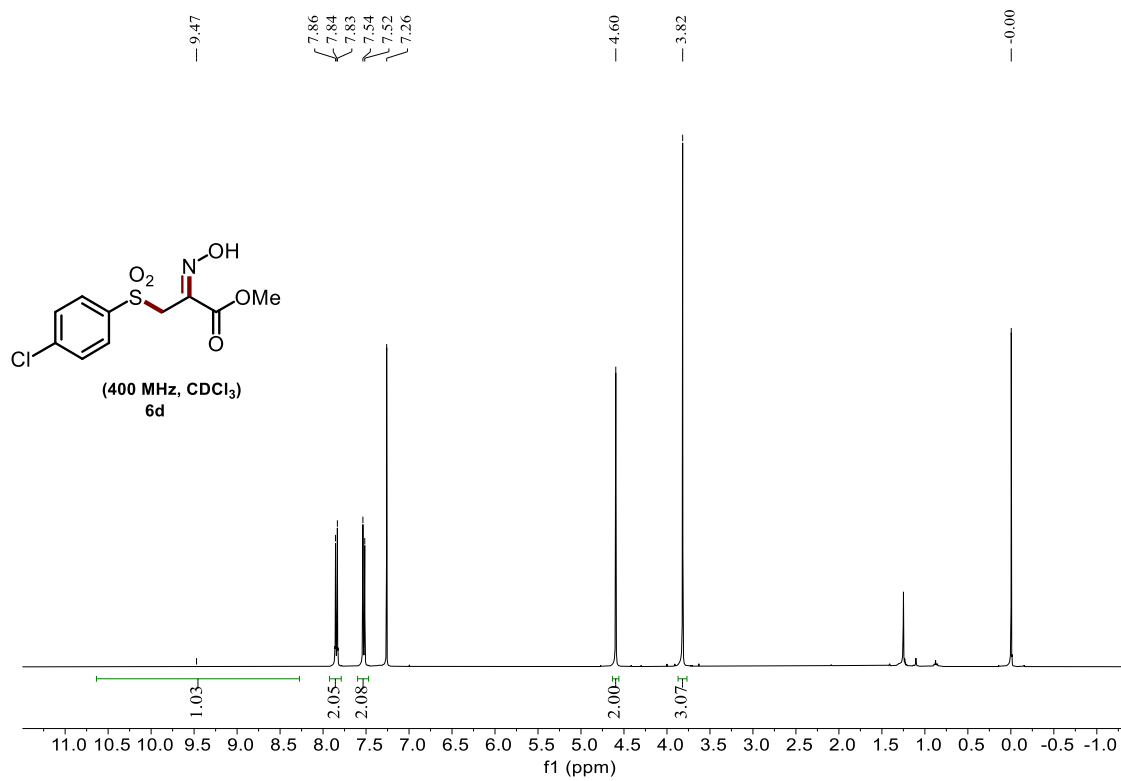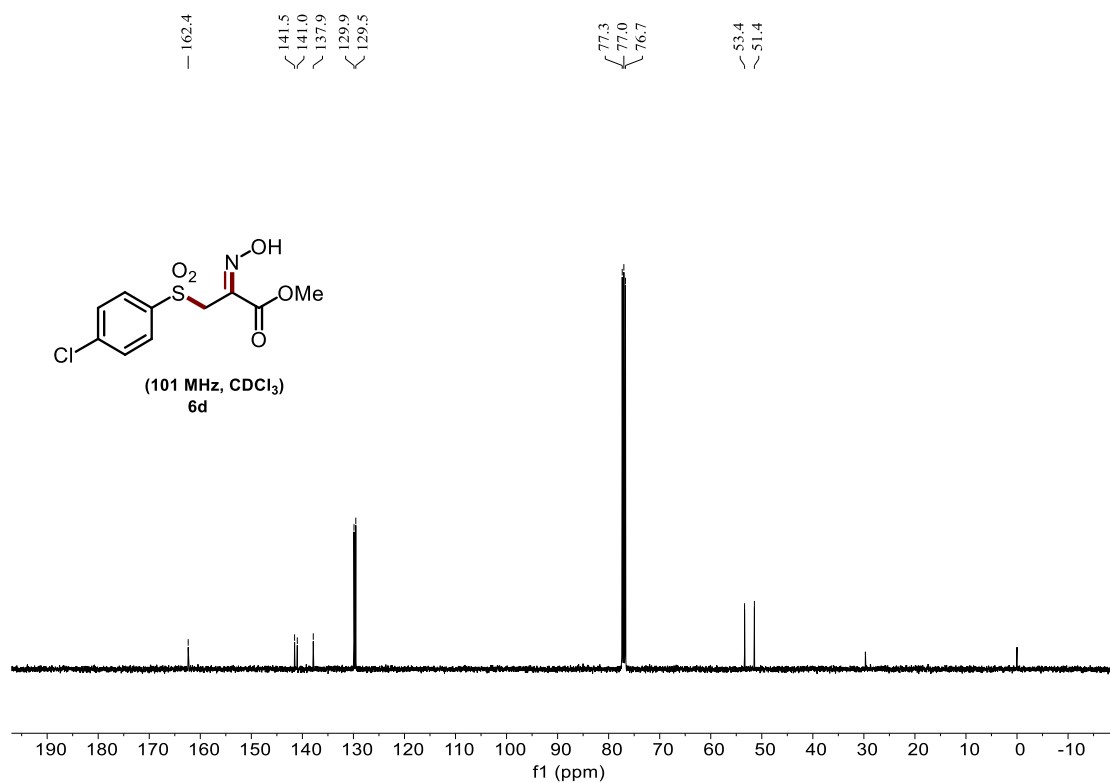

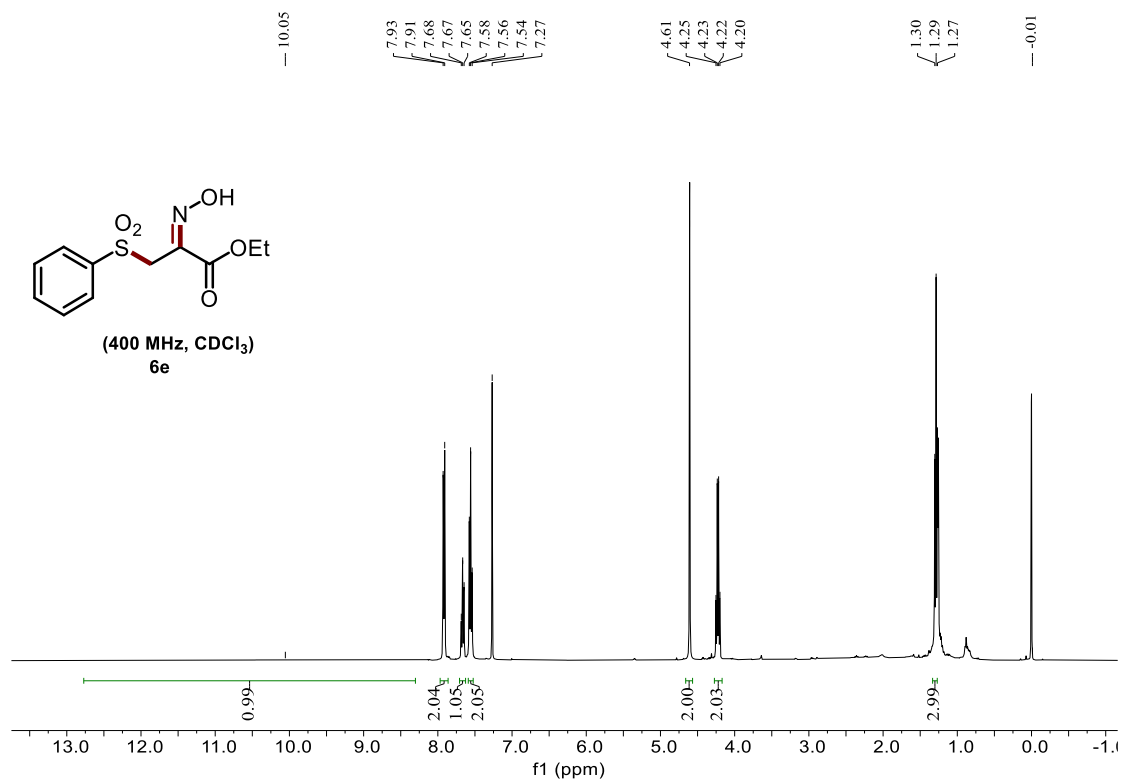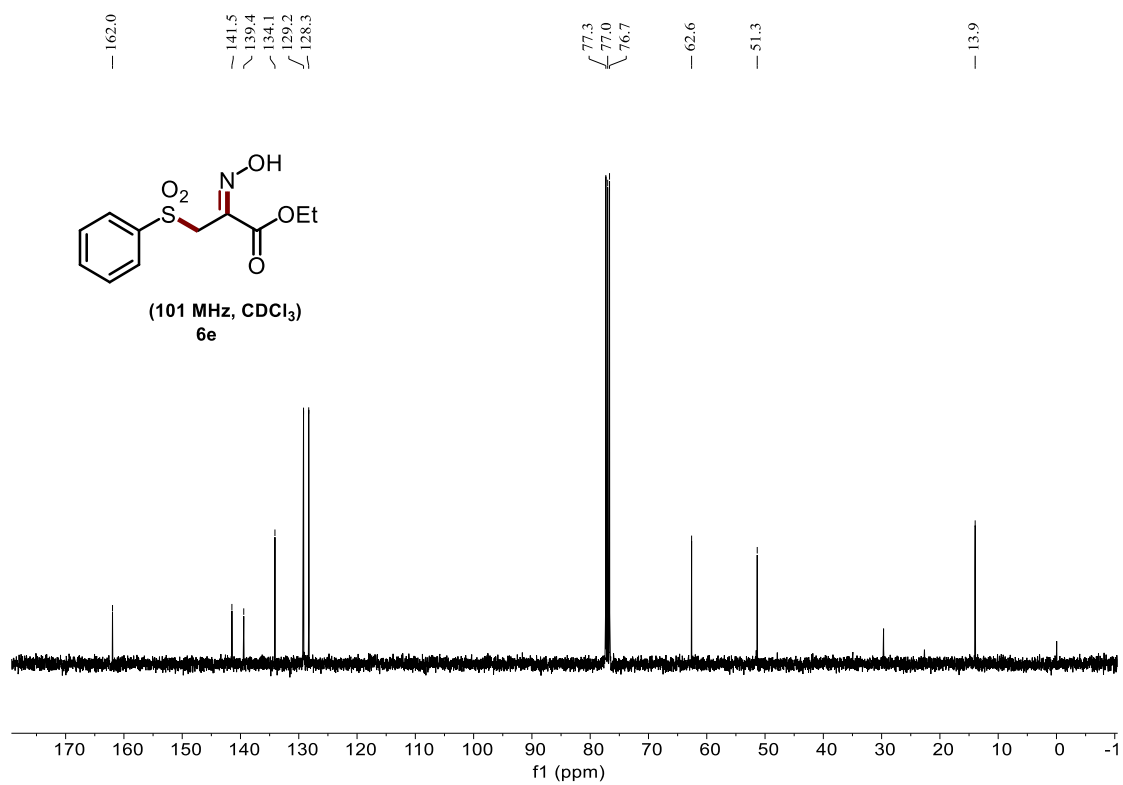

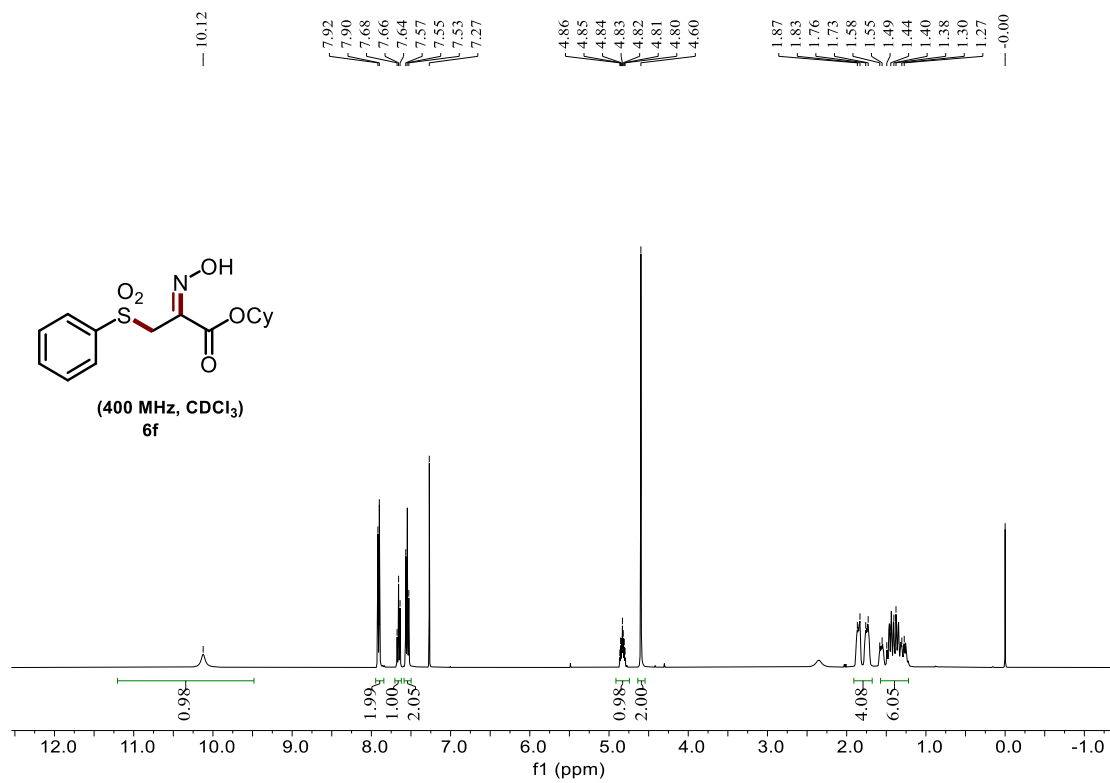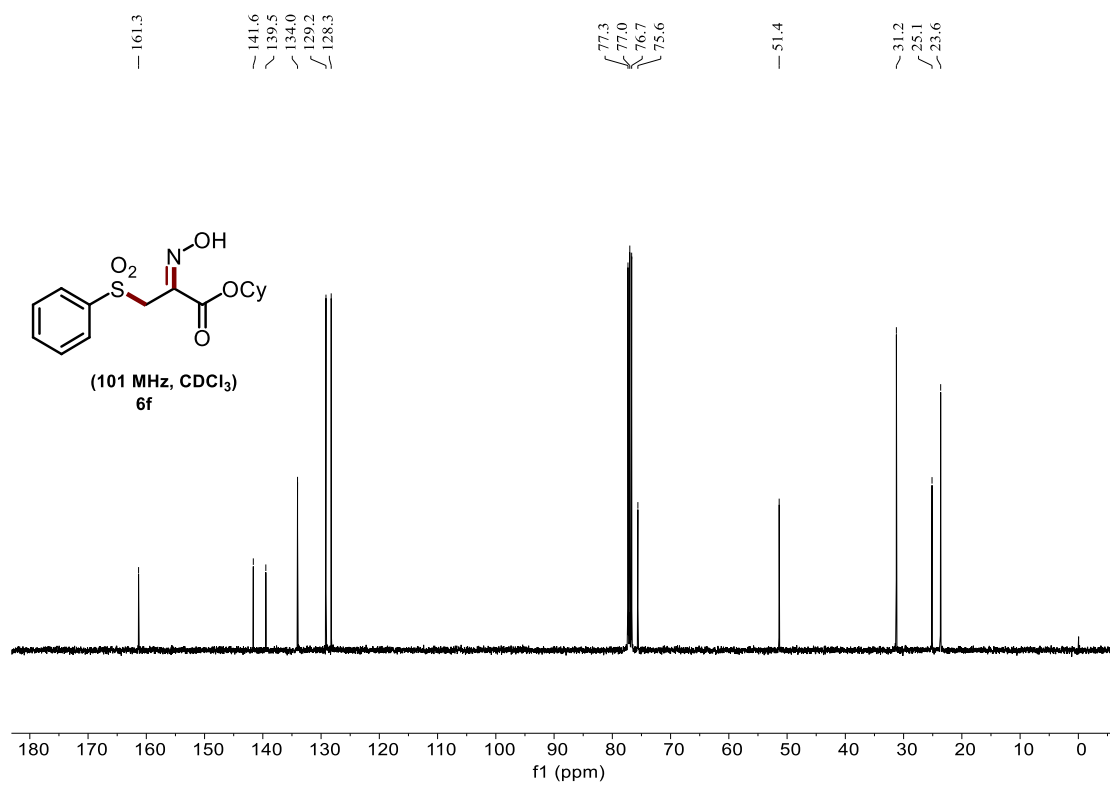

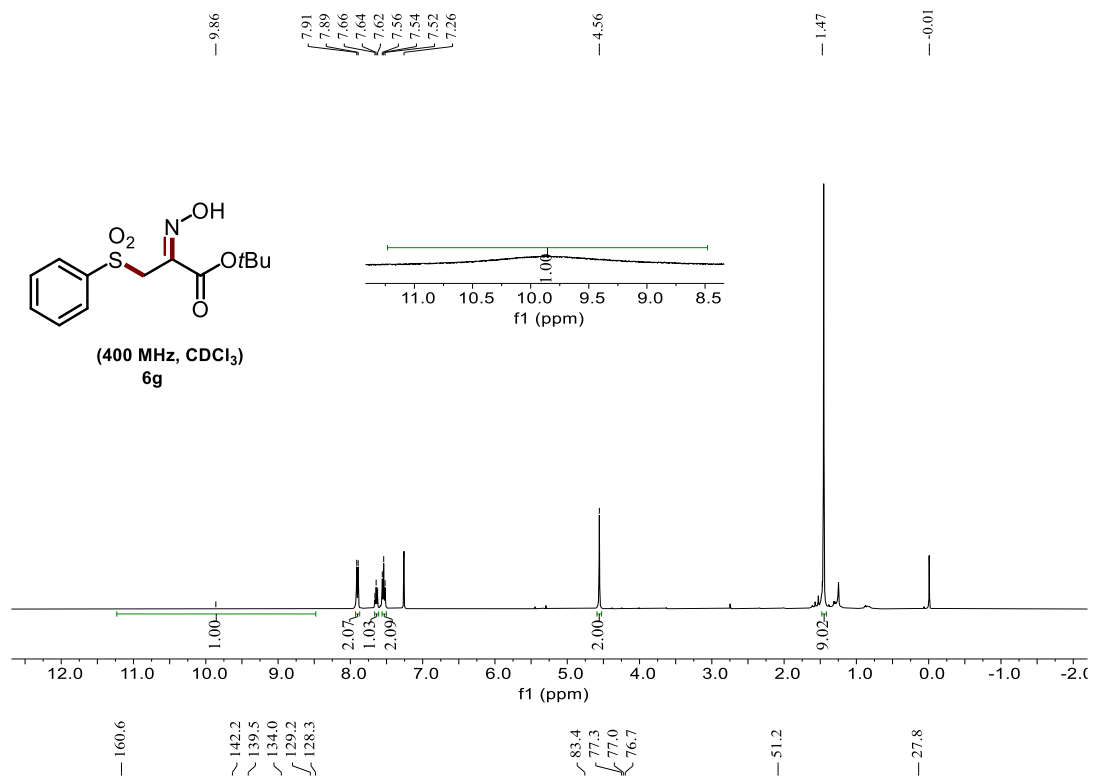

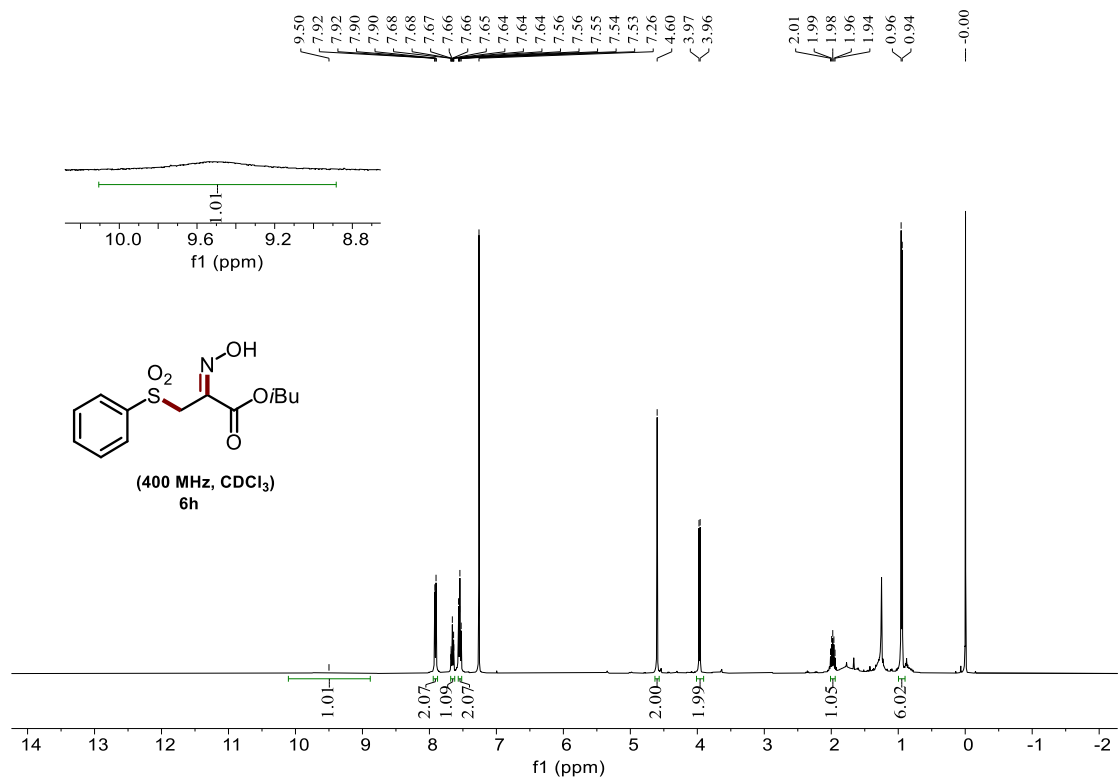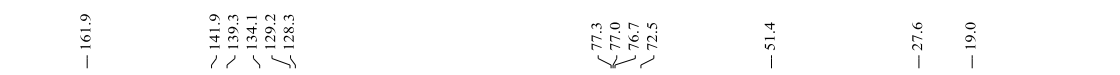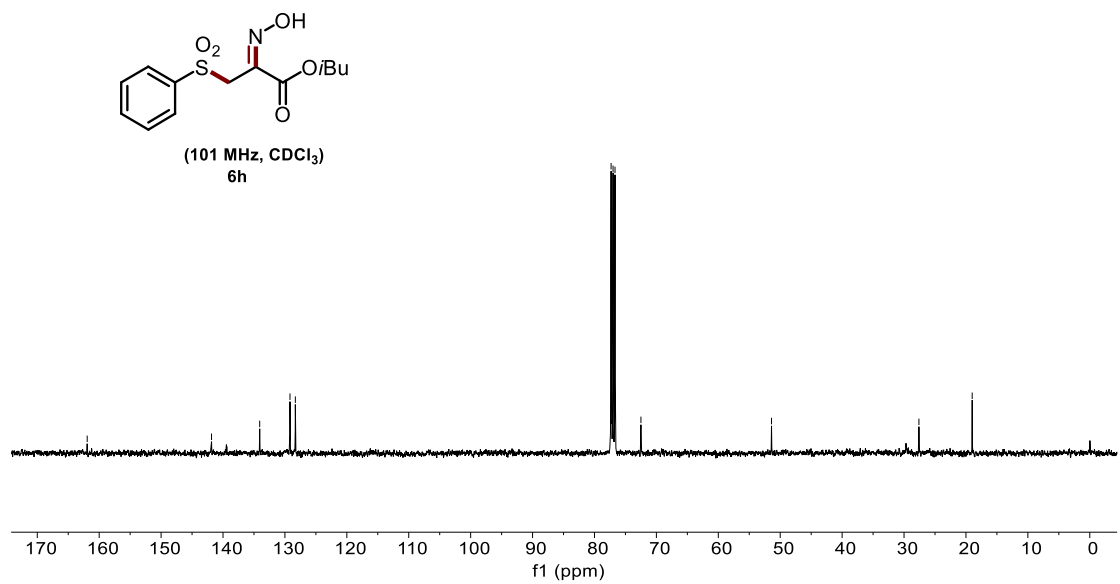

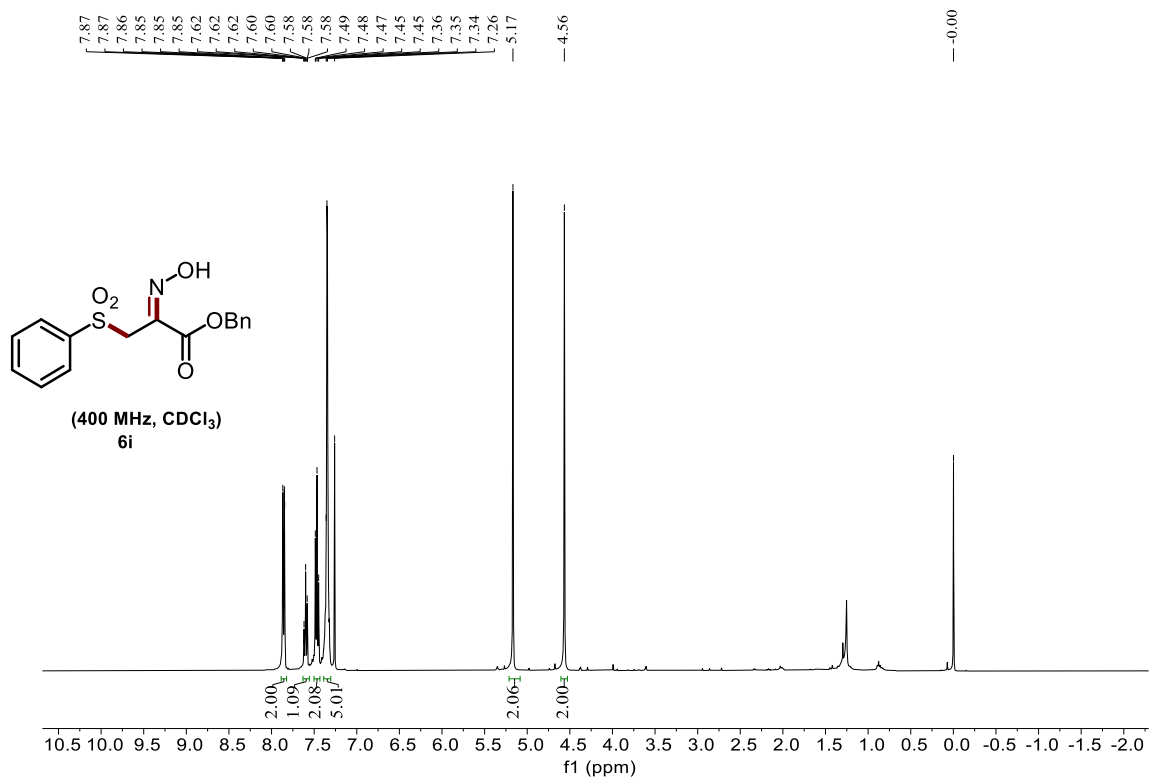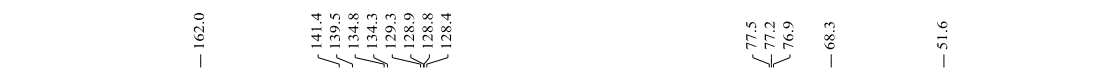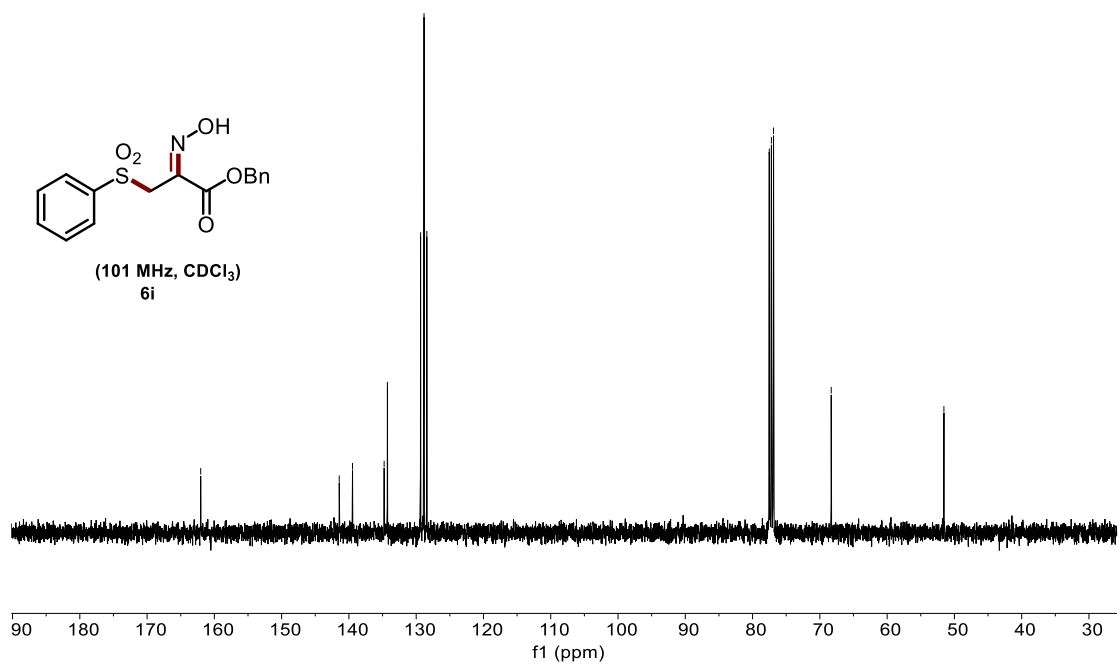

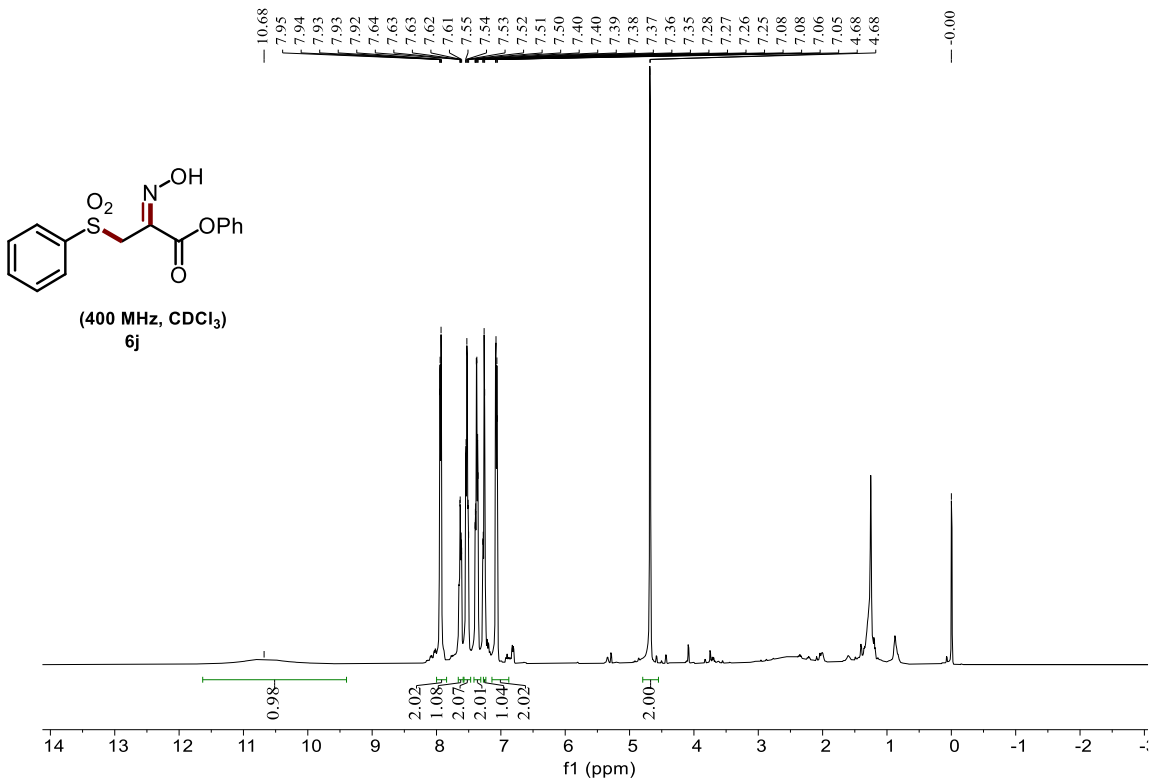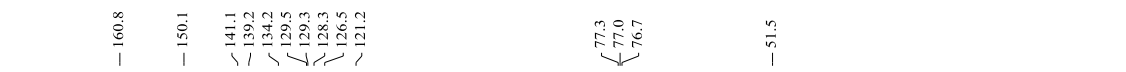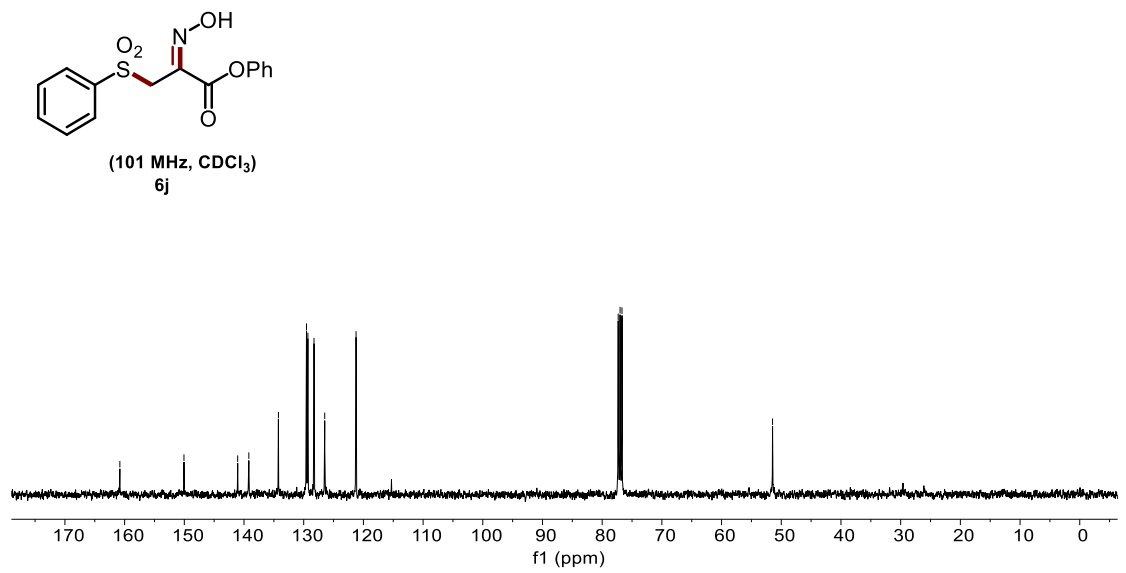



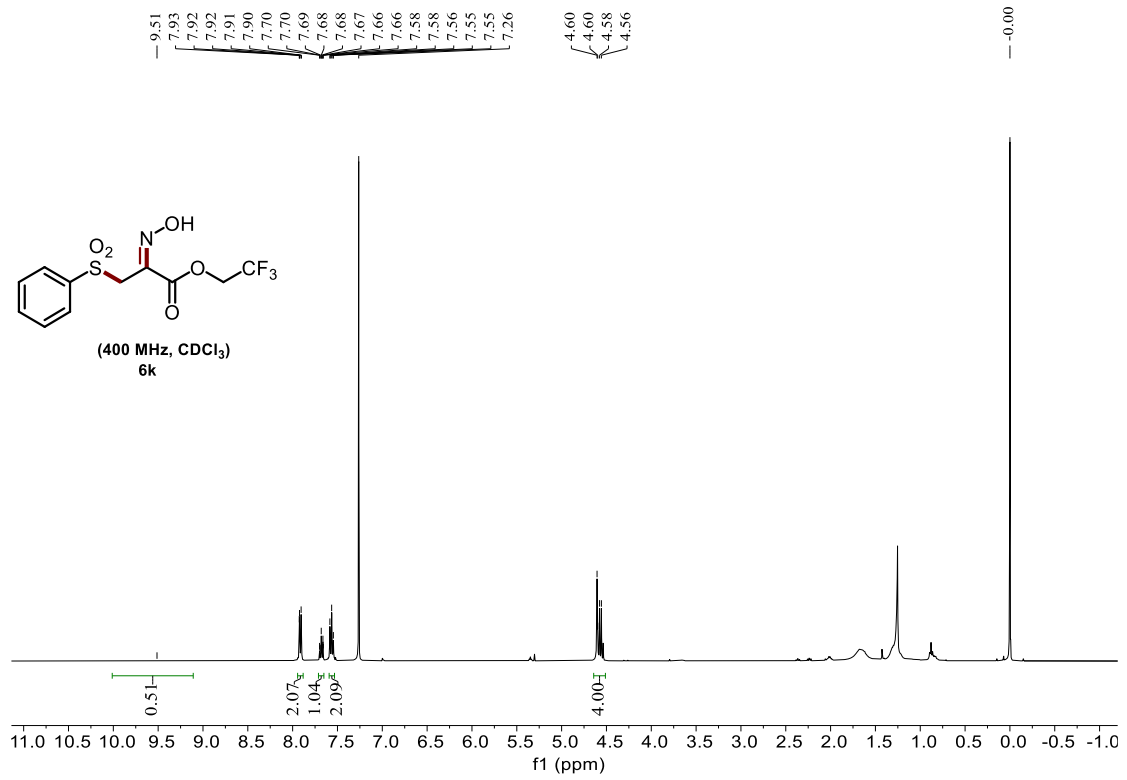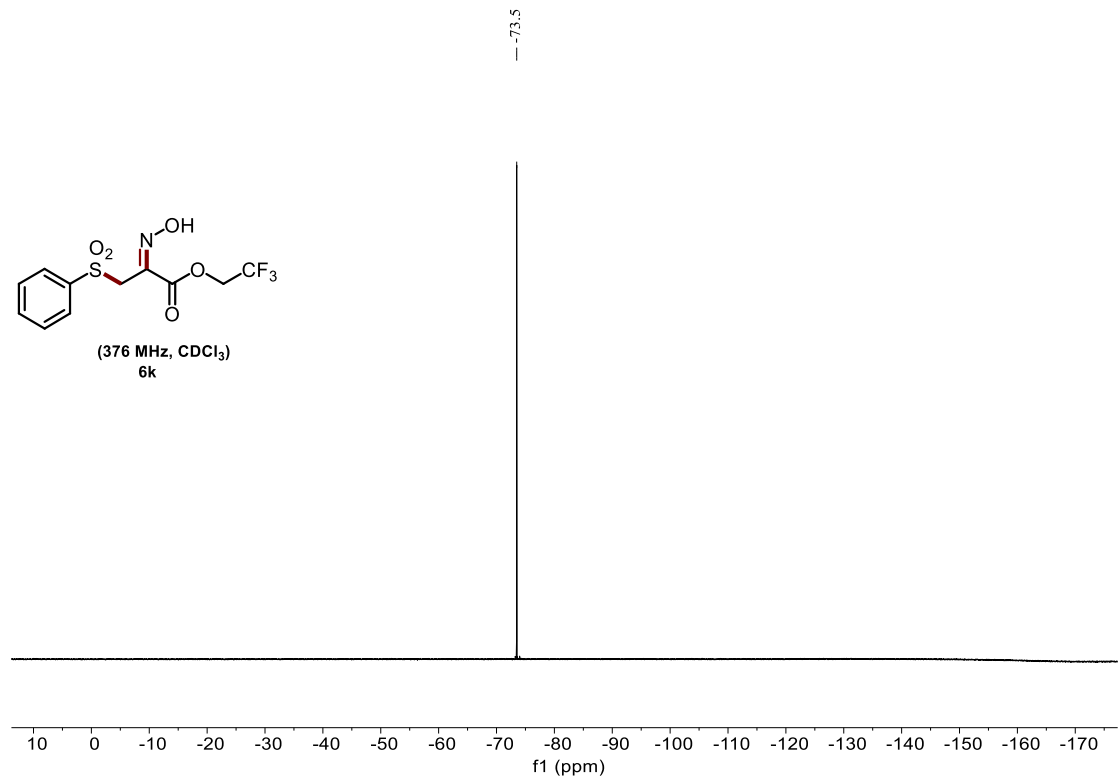

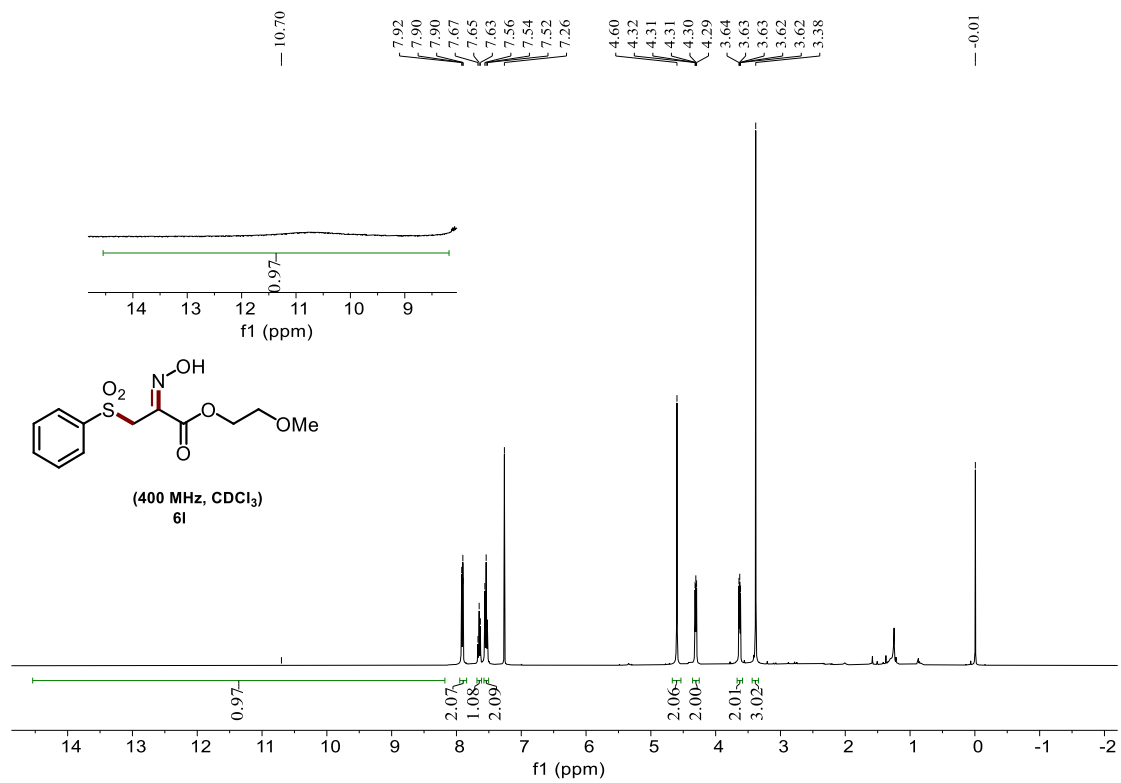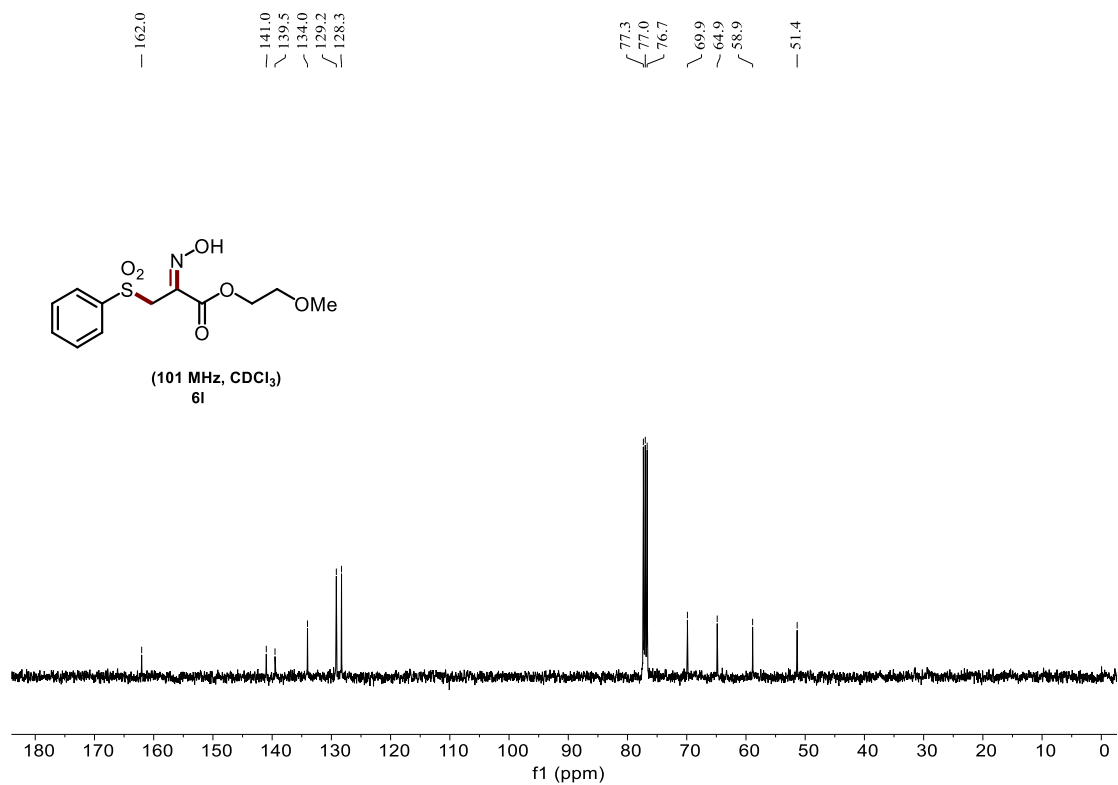

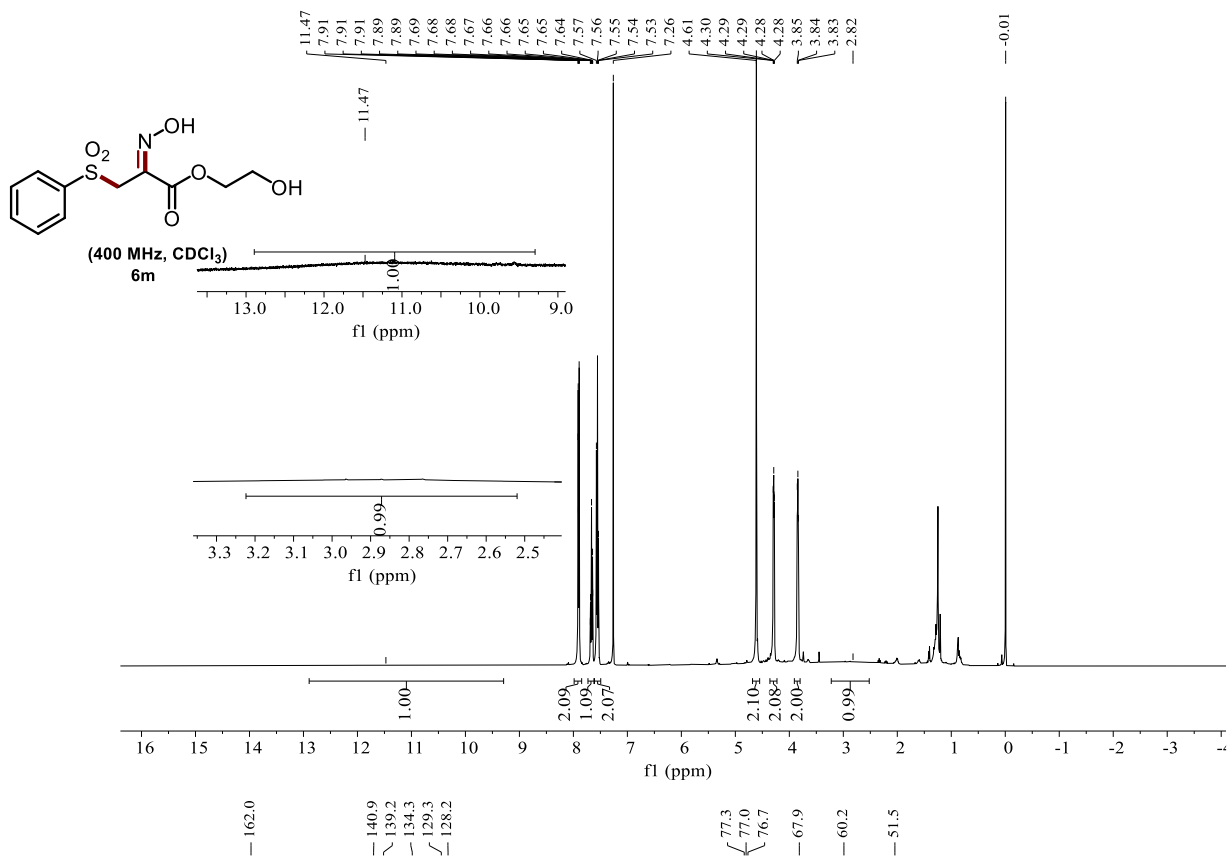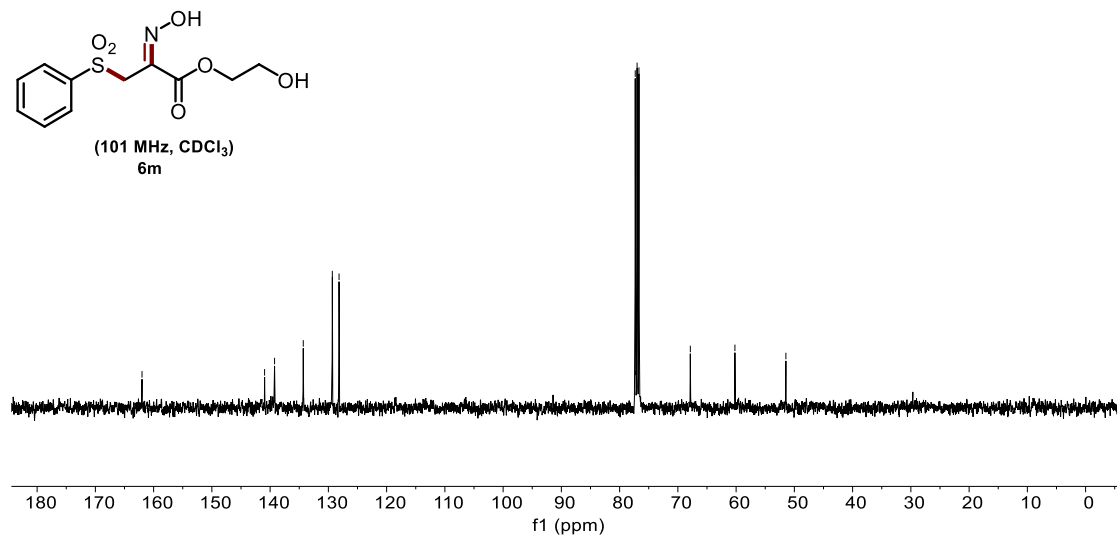

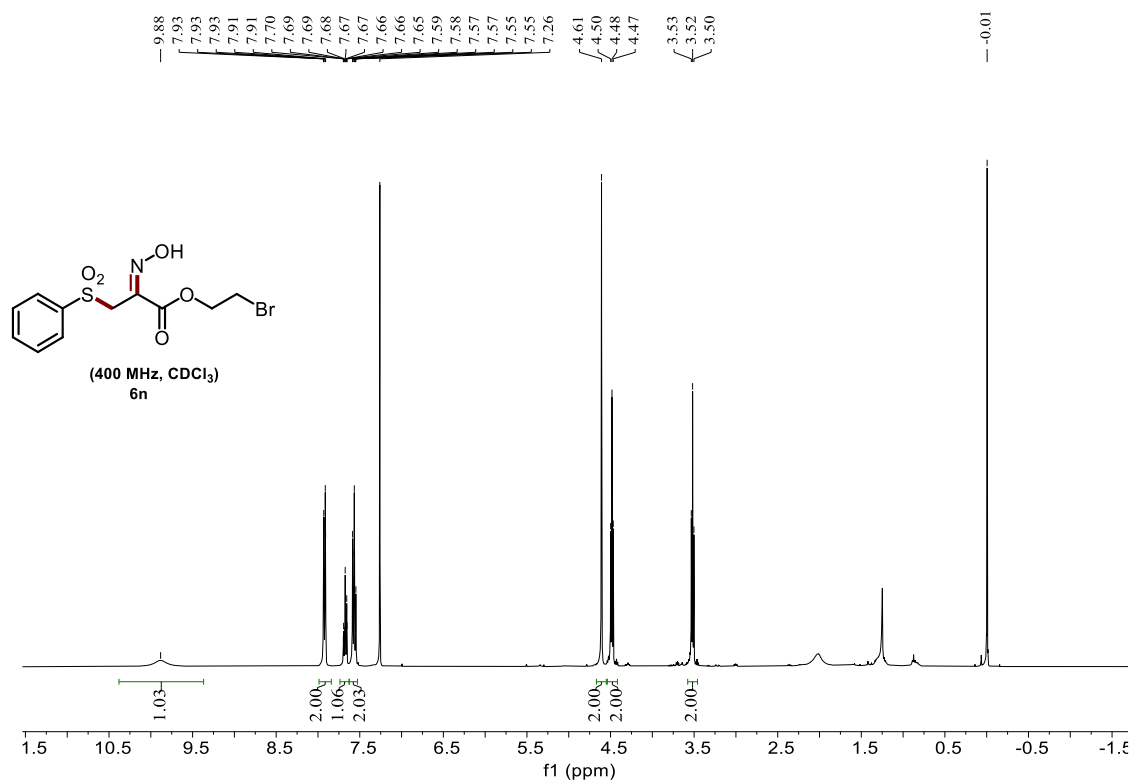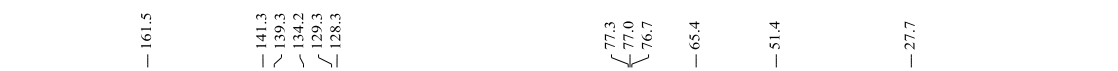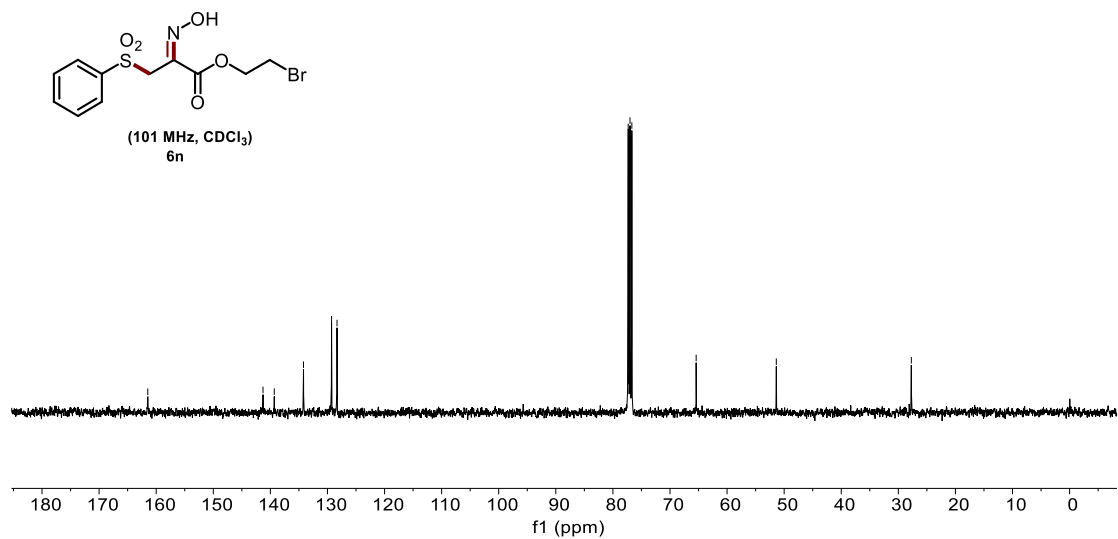

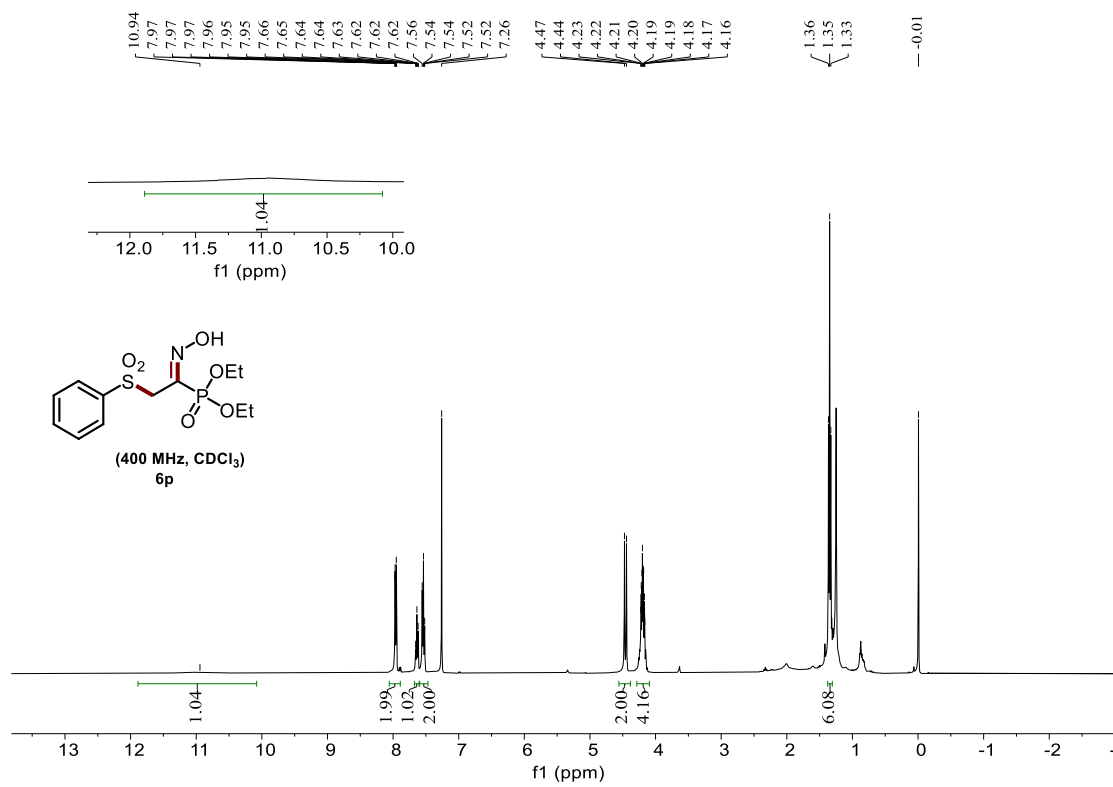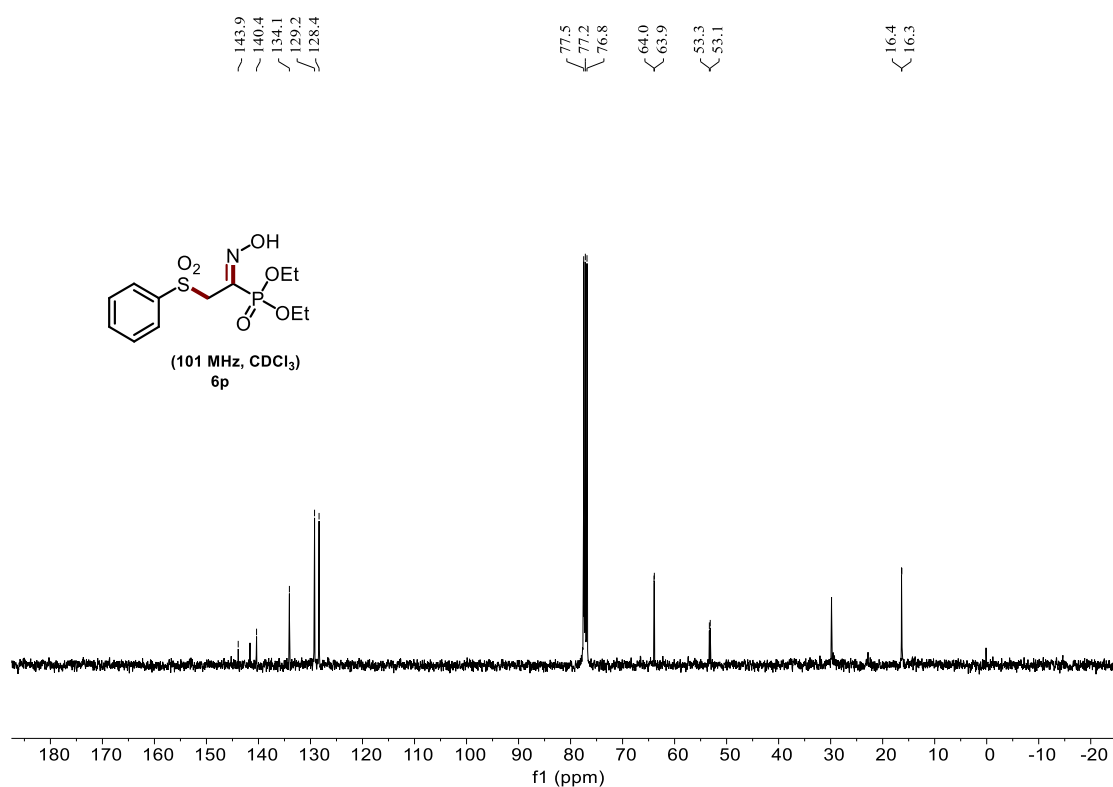

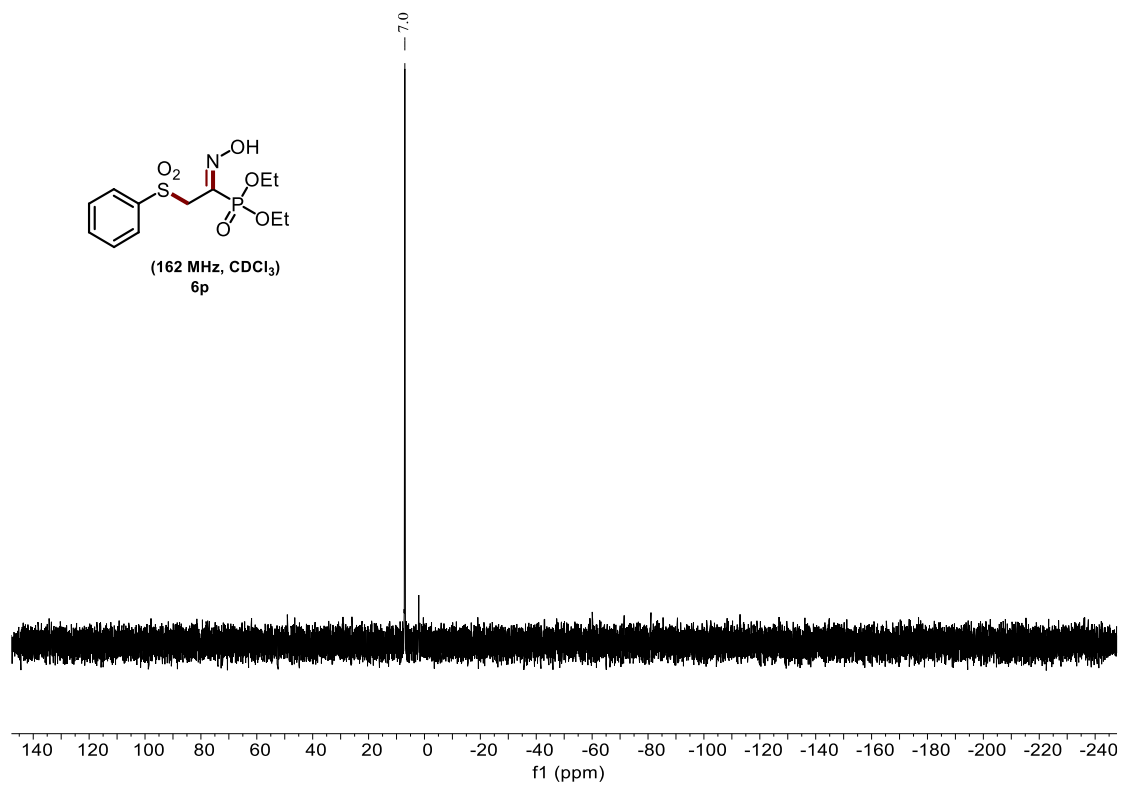

9.36  
 8.01  
 7.99  
 7.99  
 7.86  
 7.85  
 7.84  
 7.84  
 7.73  
 7.71  
 7.69  
 7.69  
 7.67  
 7.65  
 7.65  
 7.61  
 7.59  
 7.58  
 7.57  
 7.55  
 7.54  
 7.52  
 7.26  
 -0.00

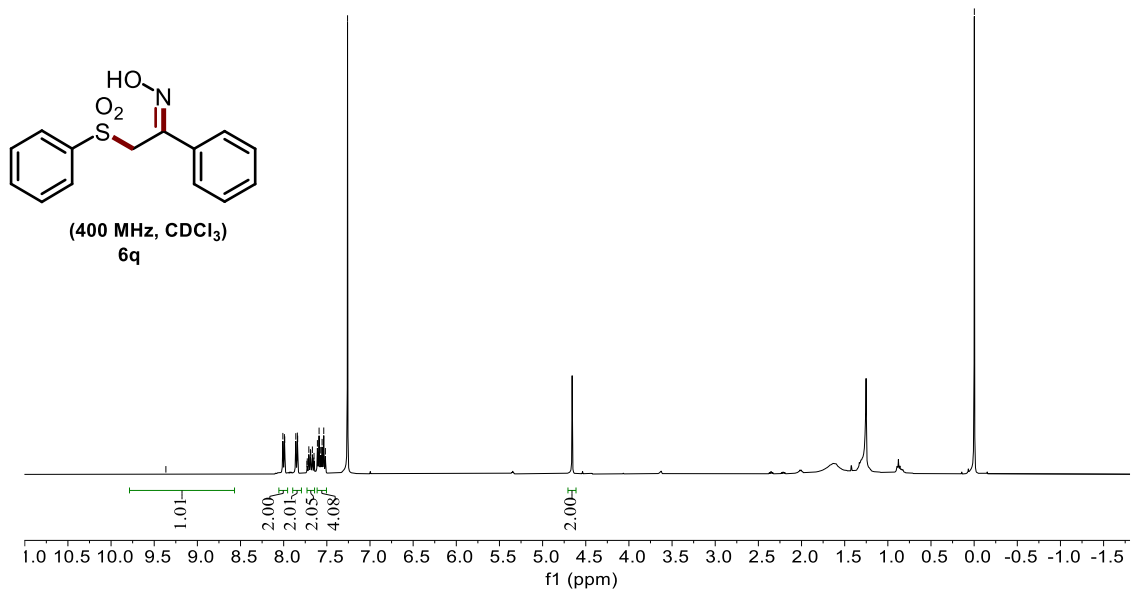

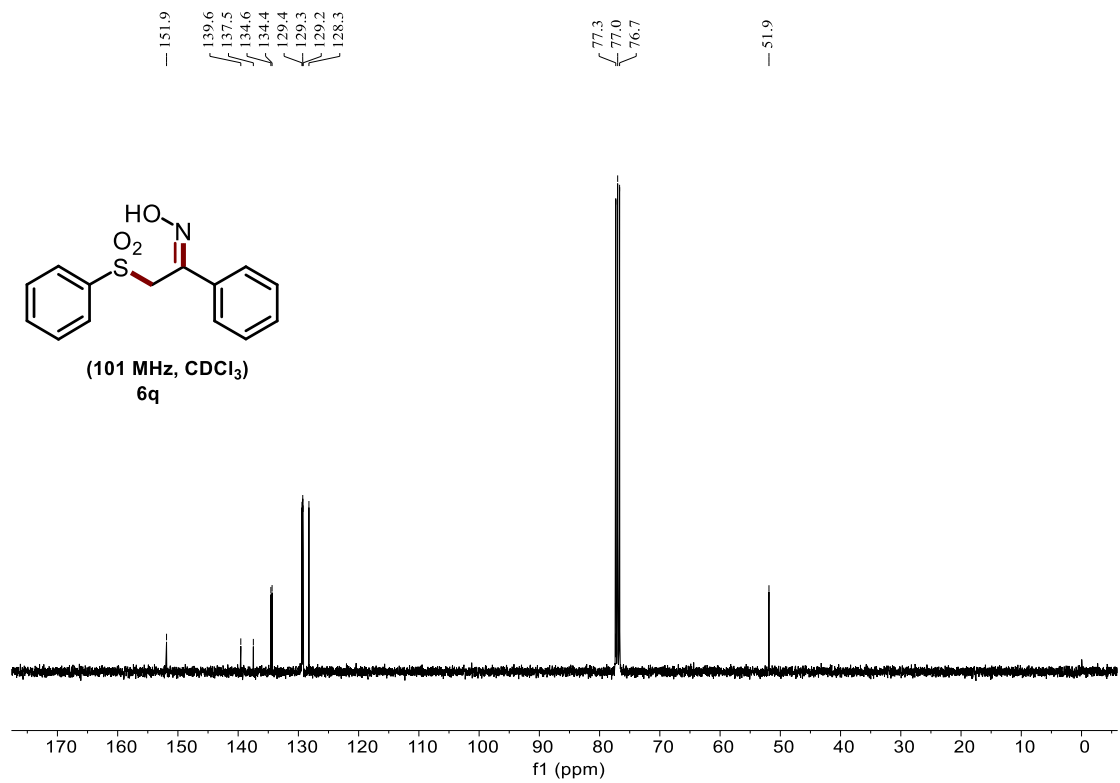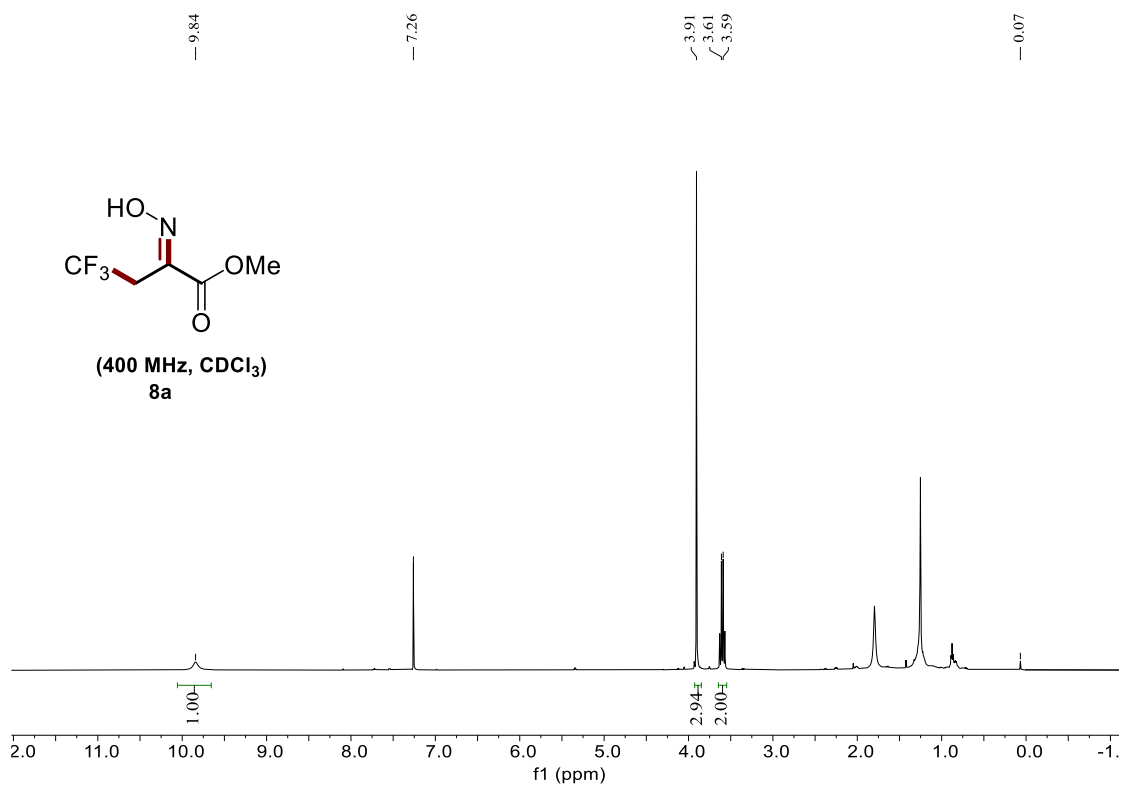

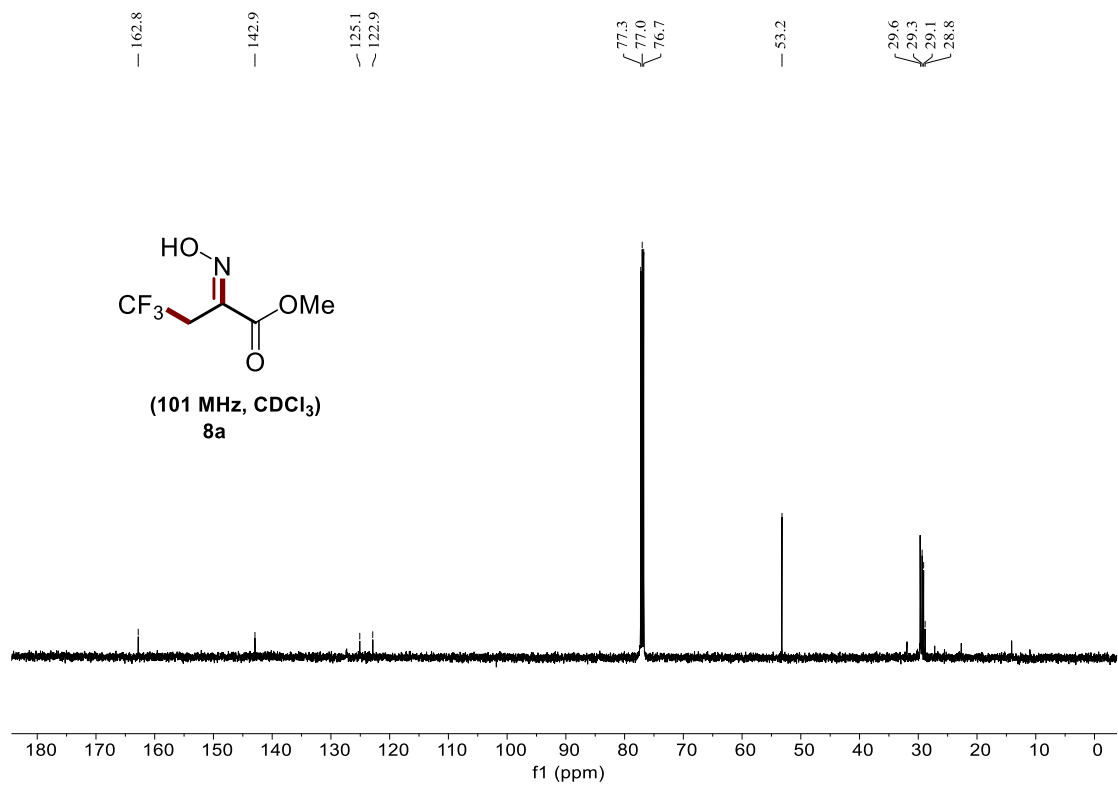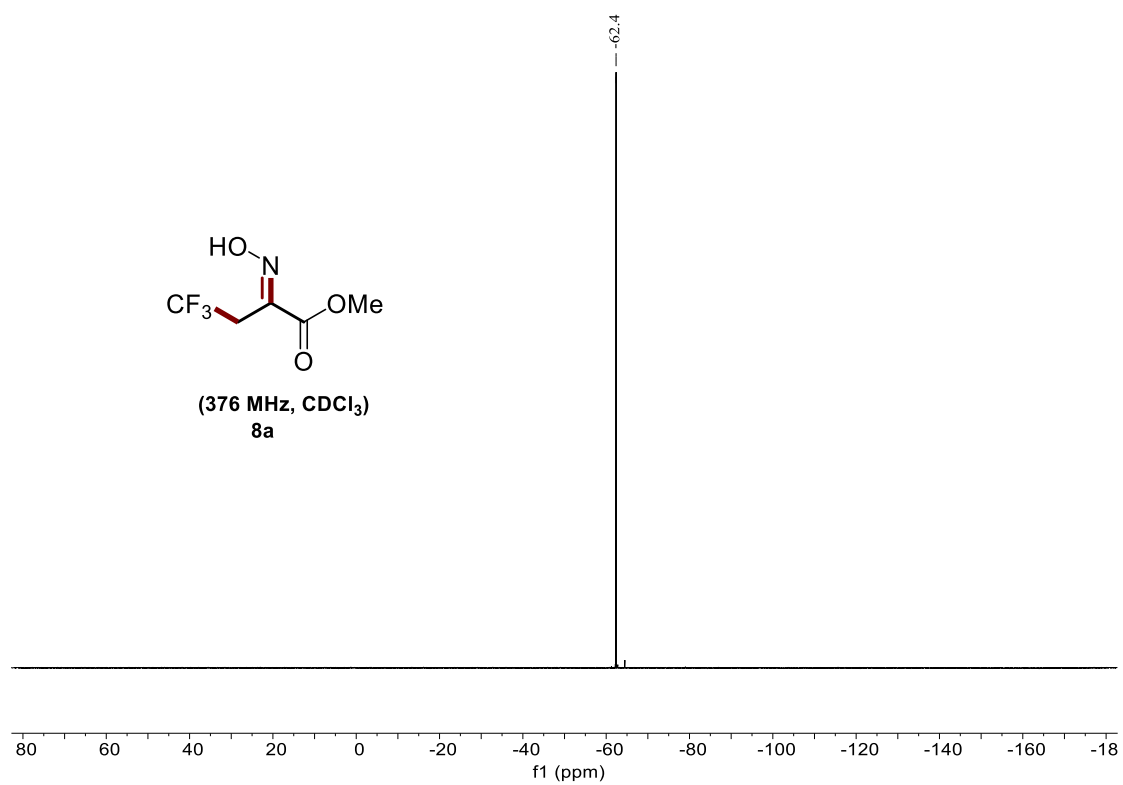



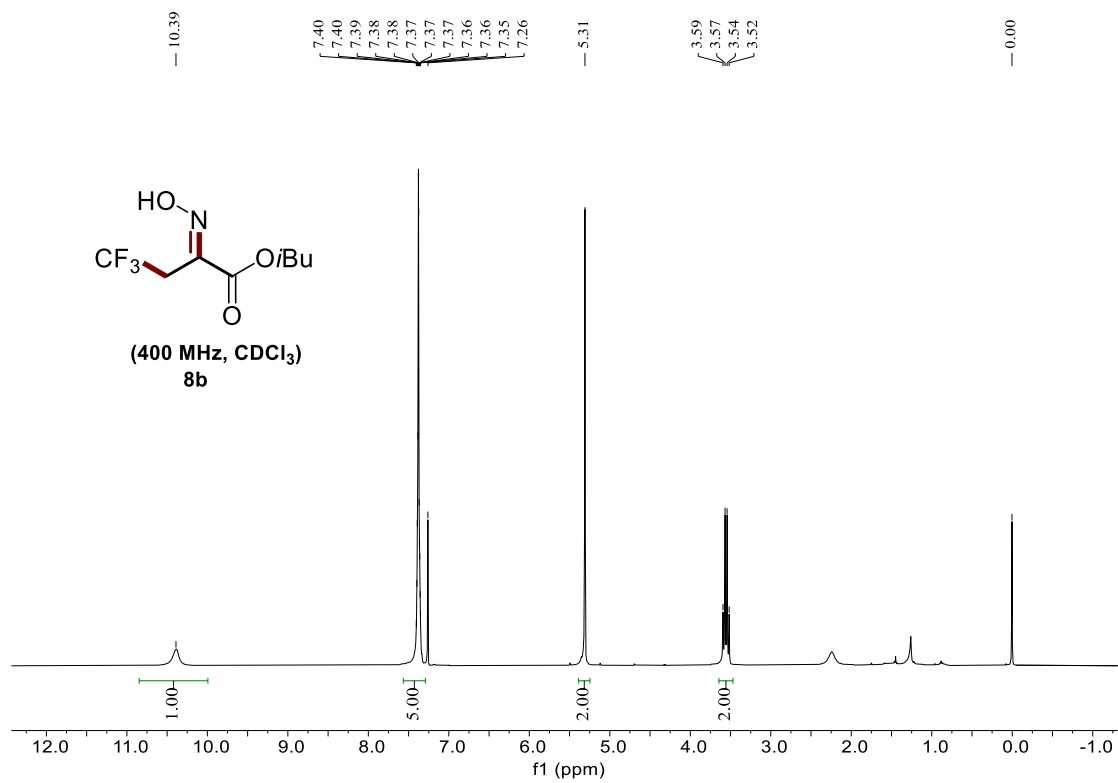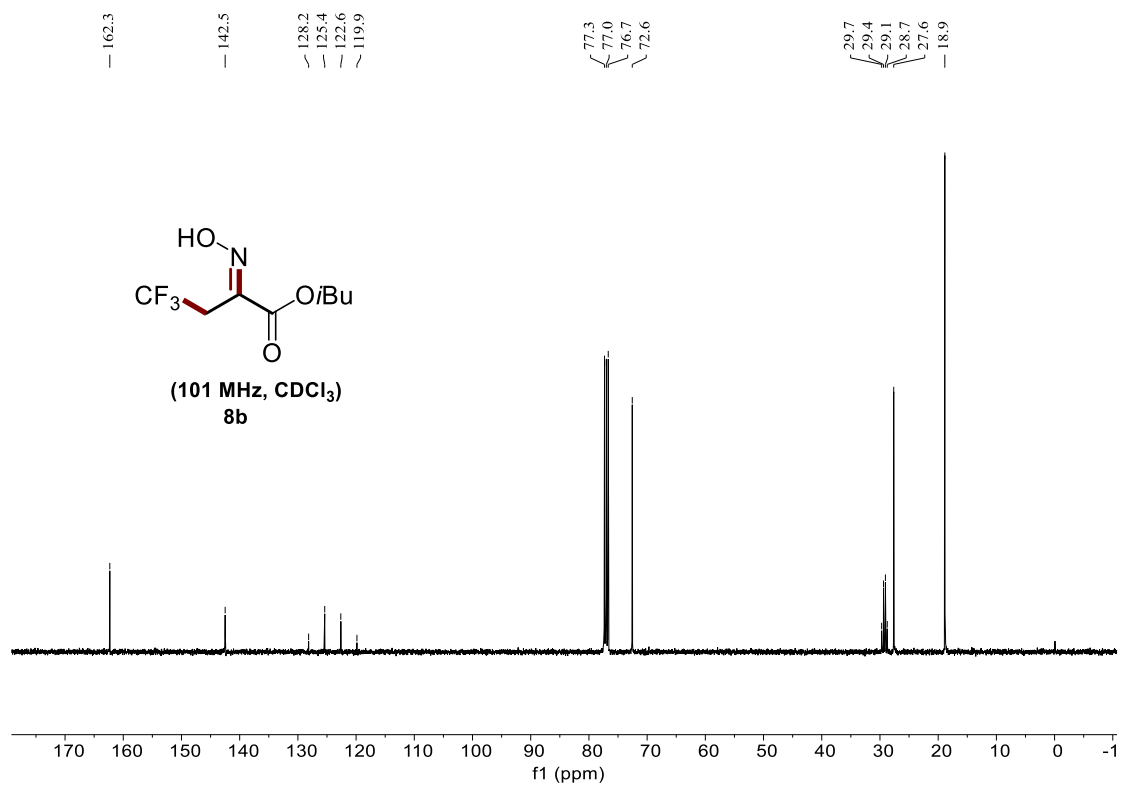

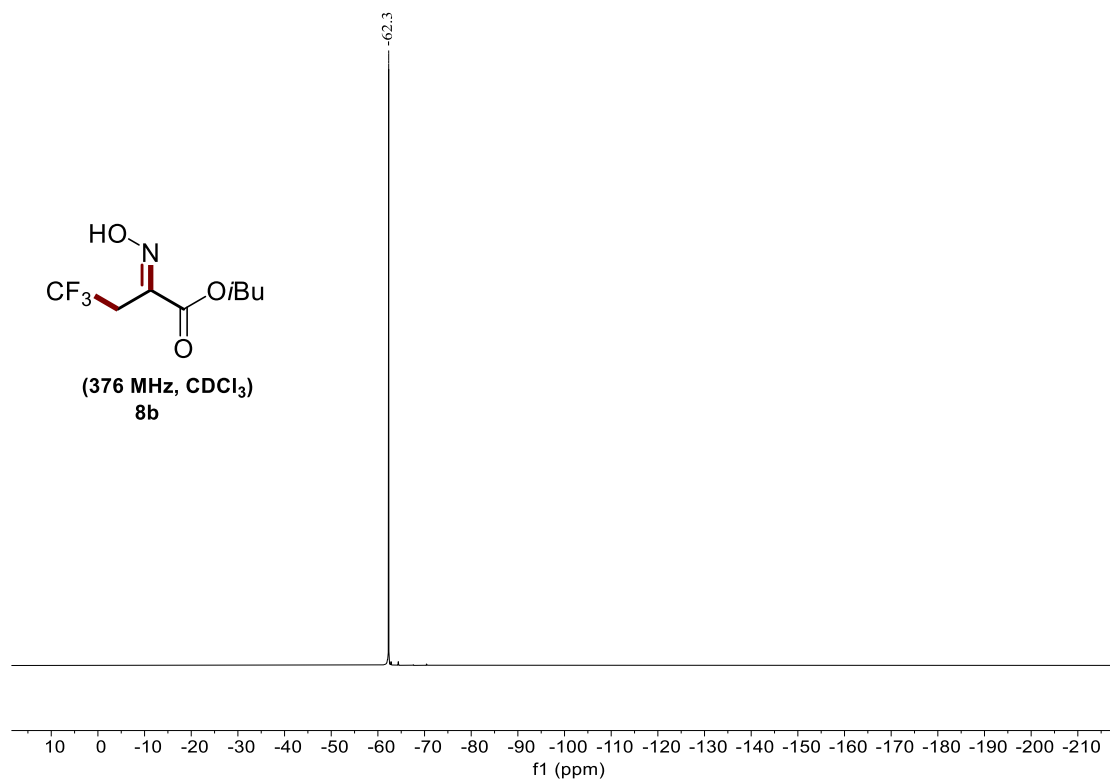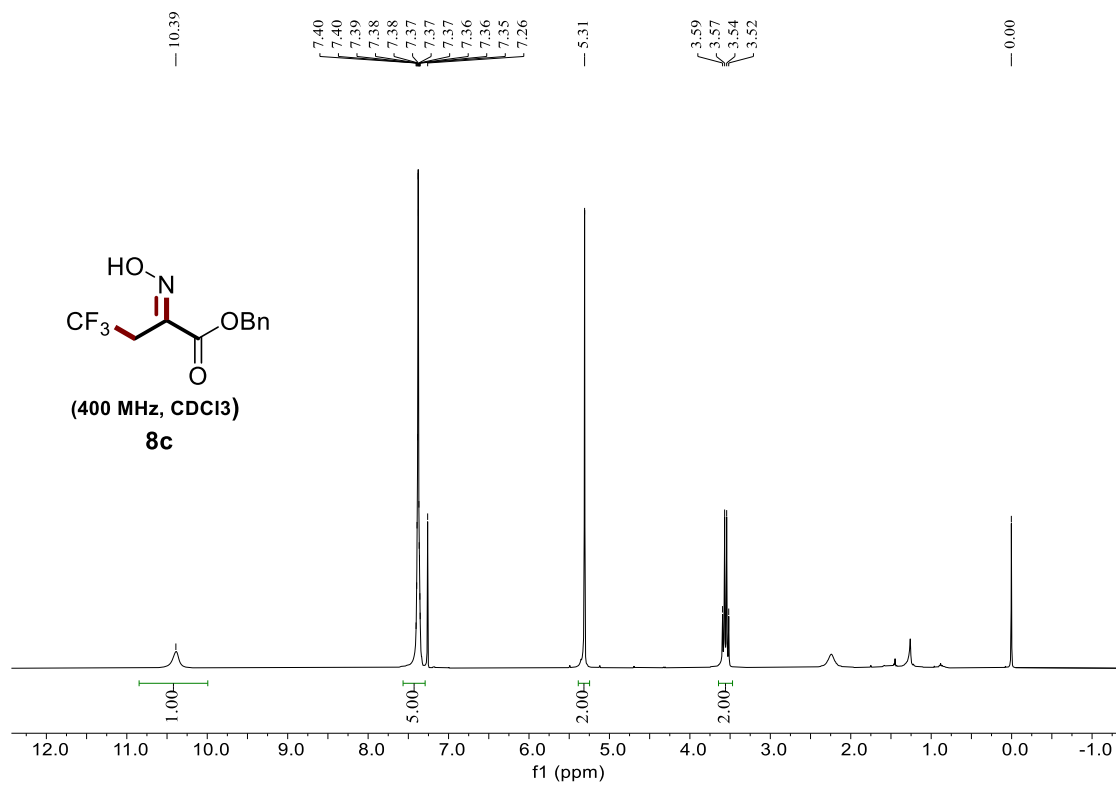

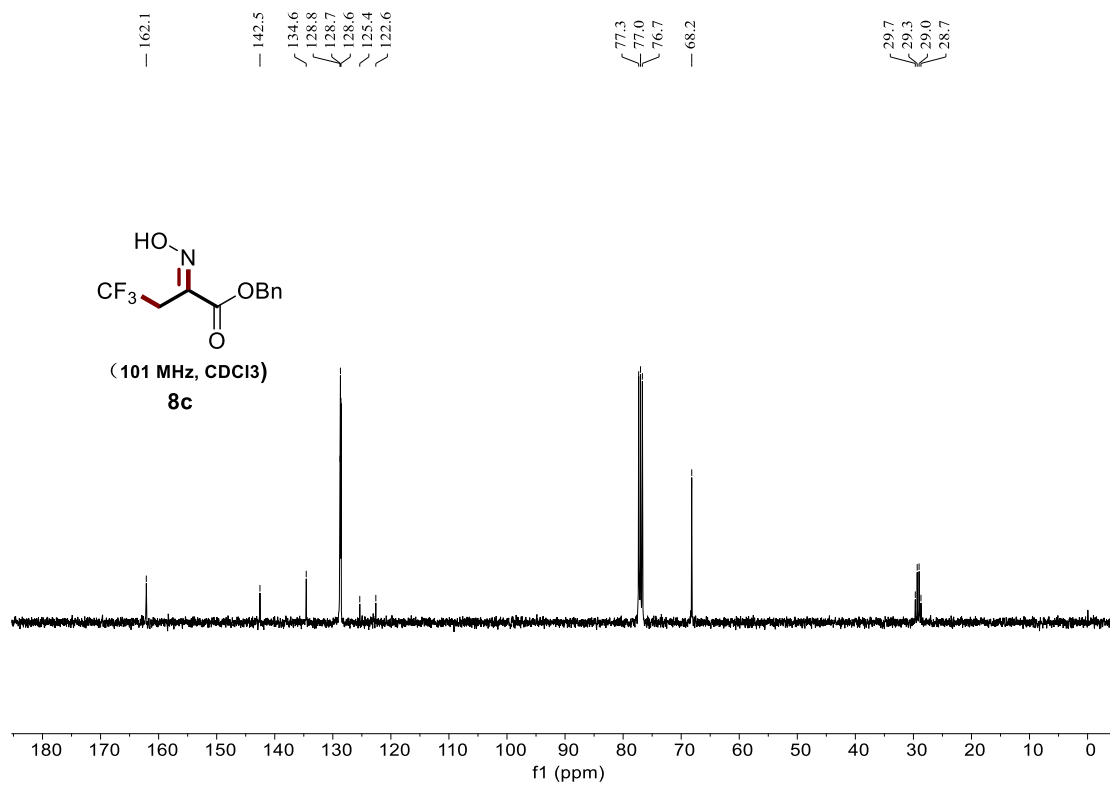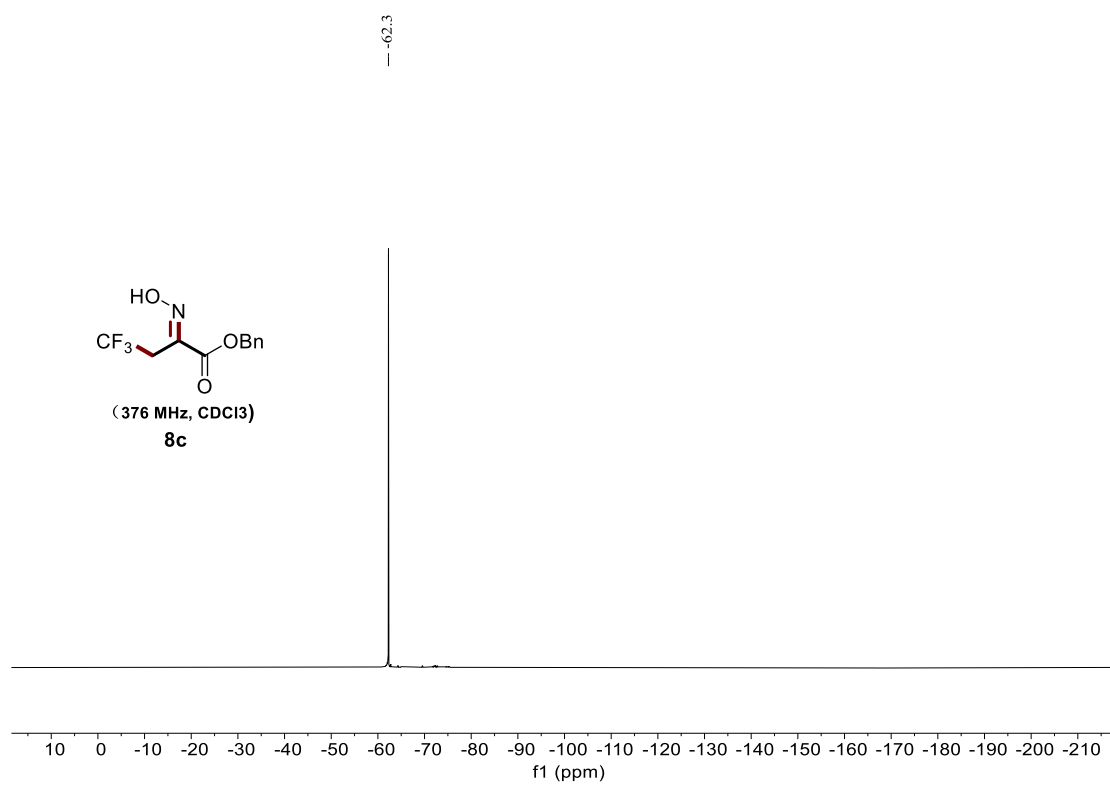

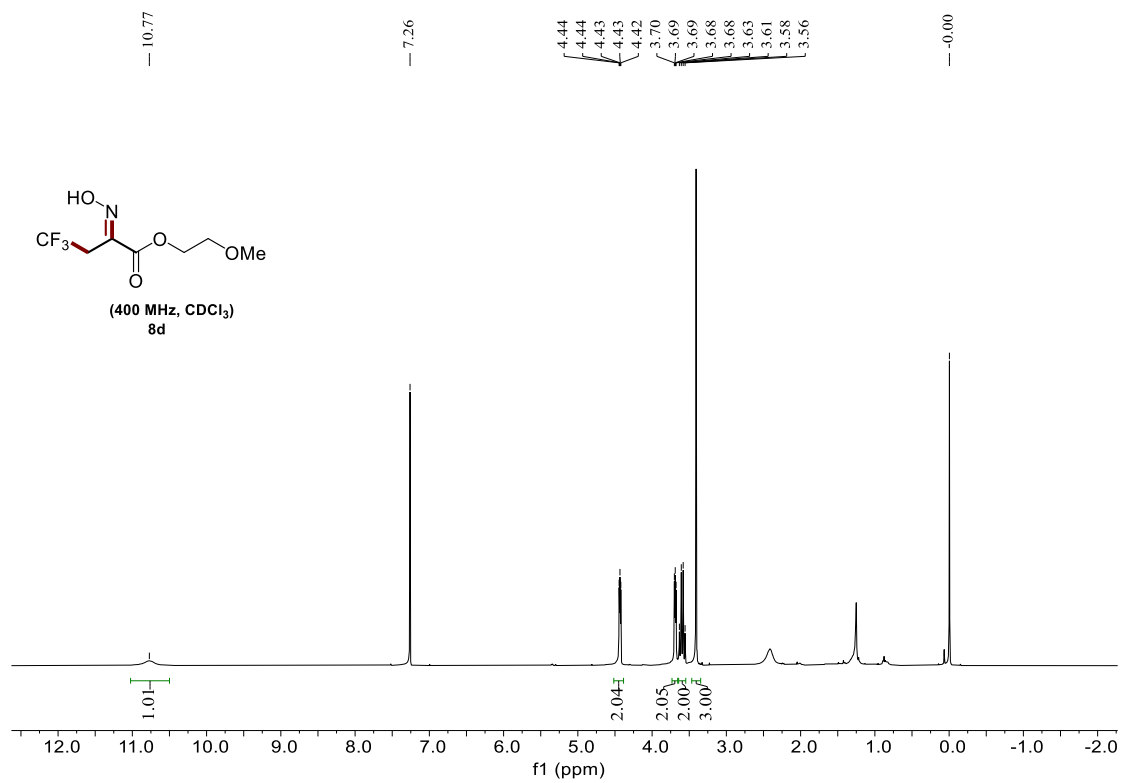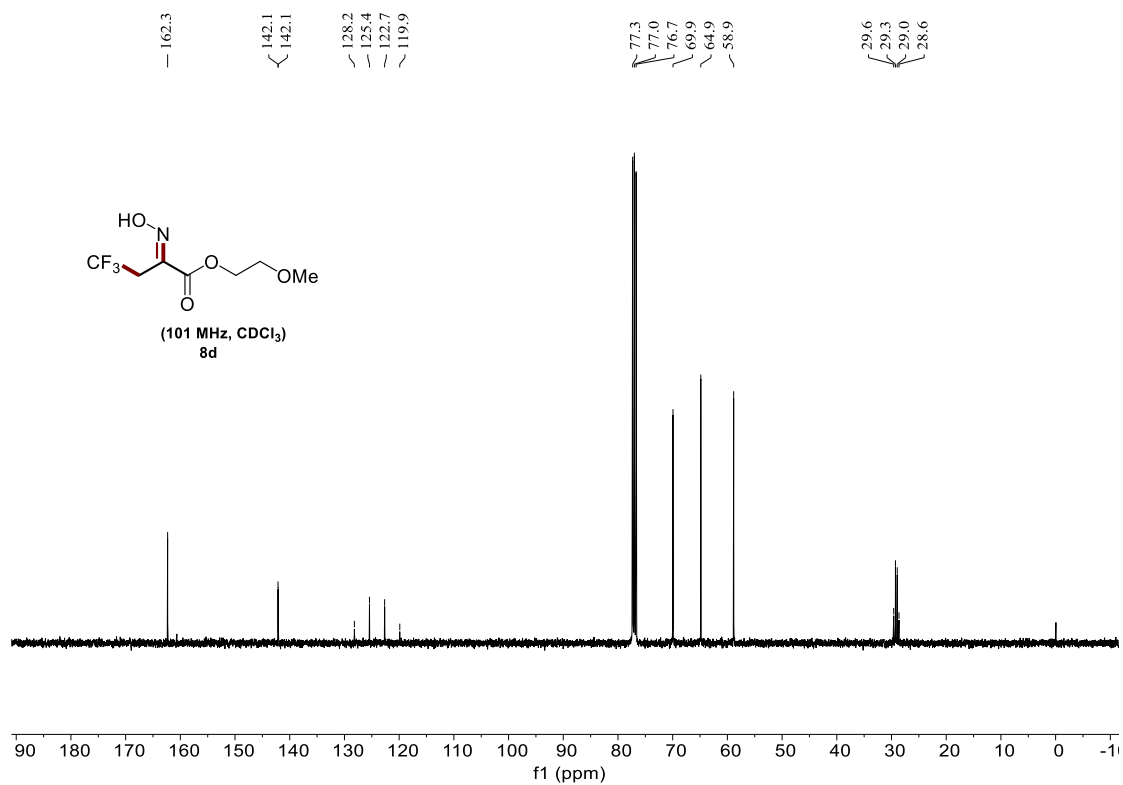

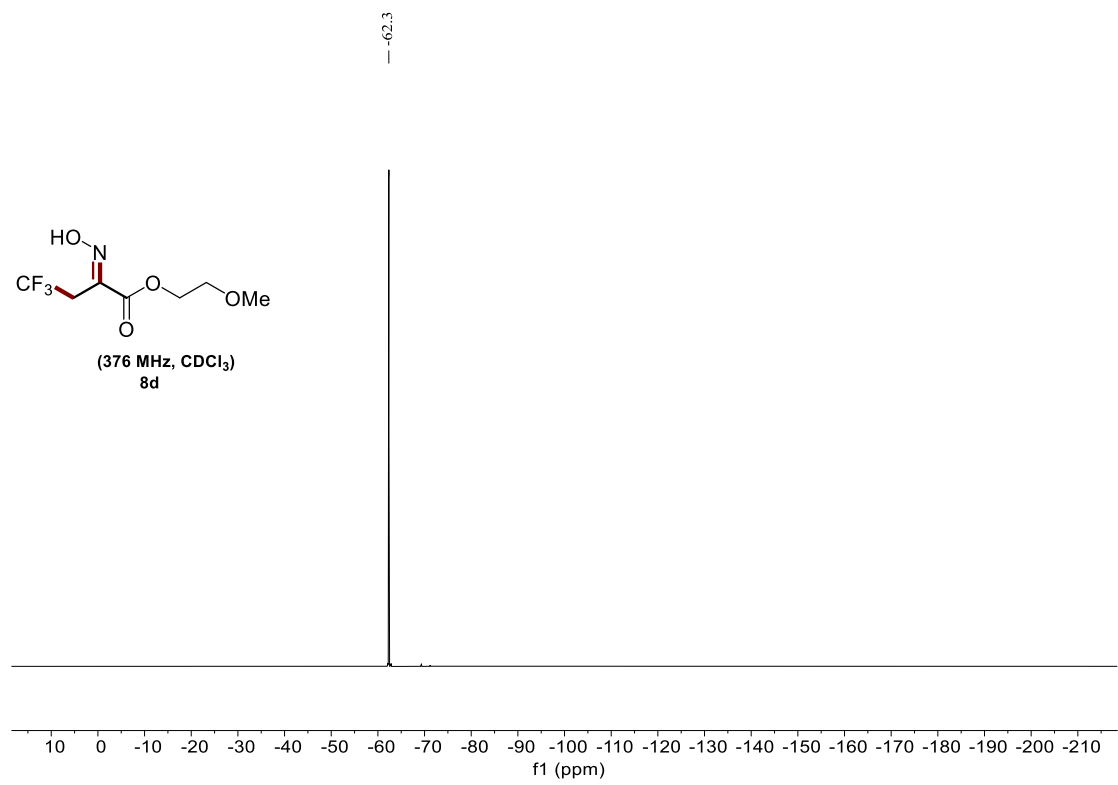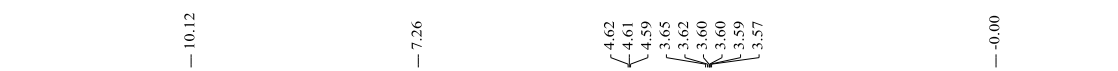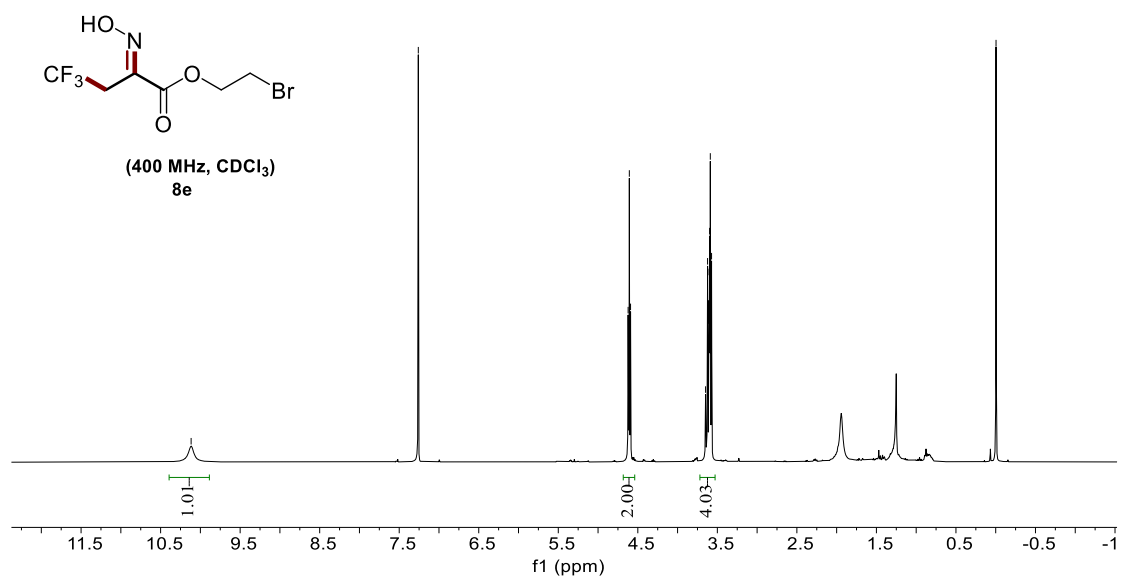

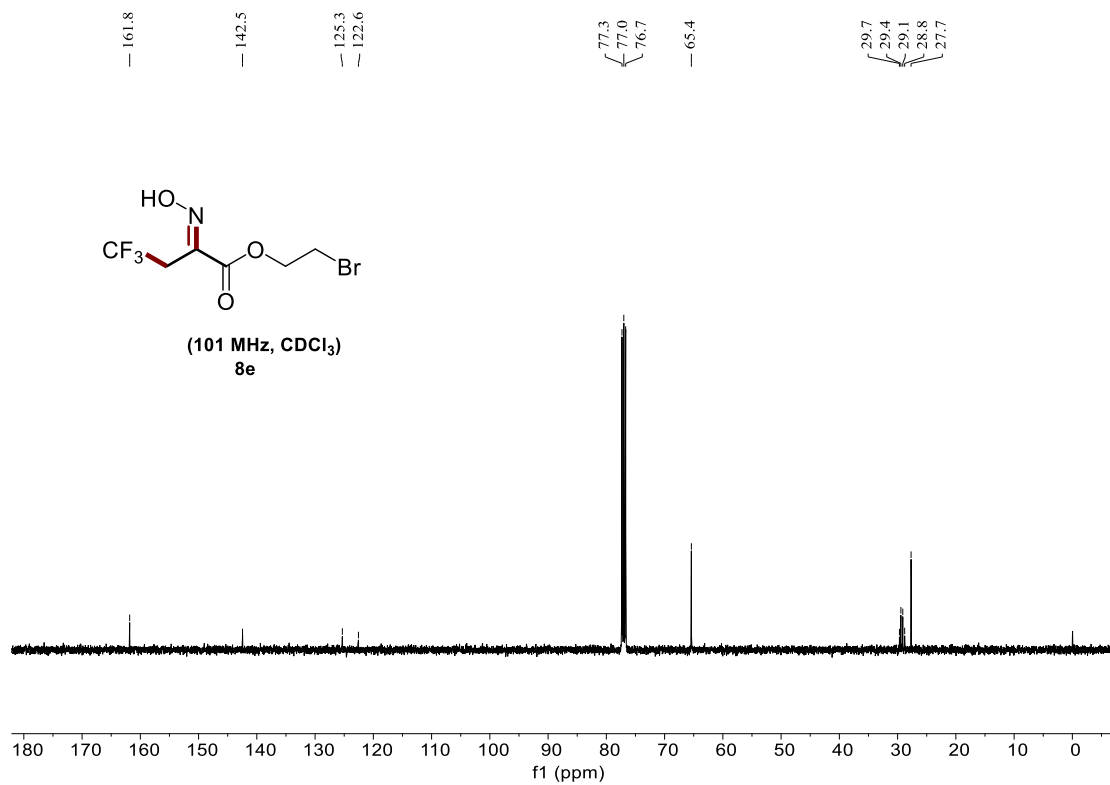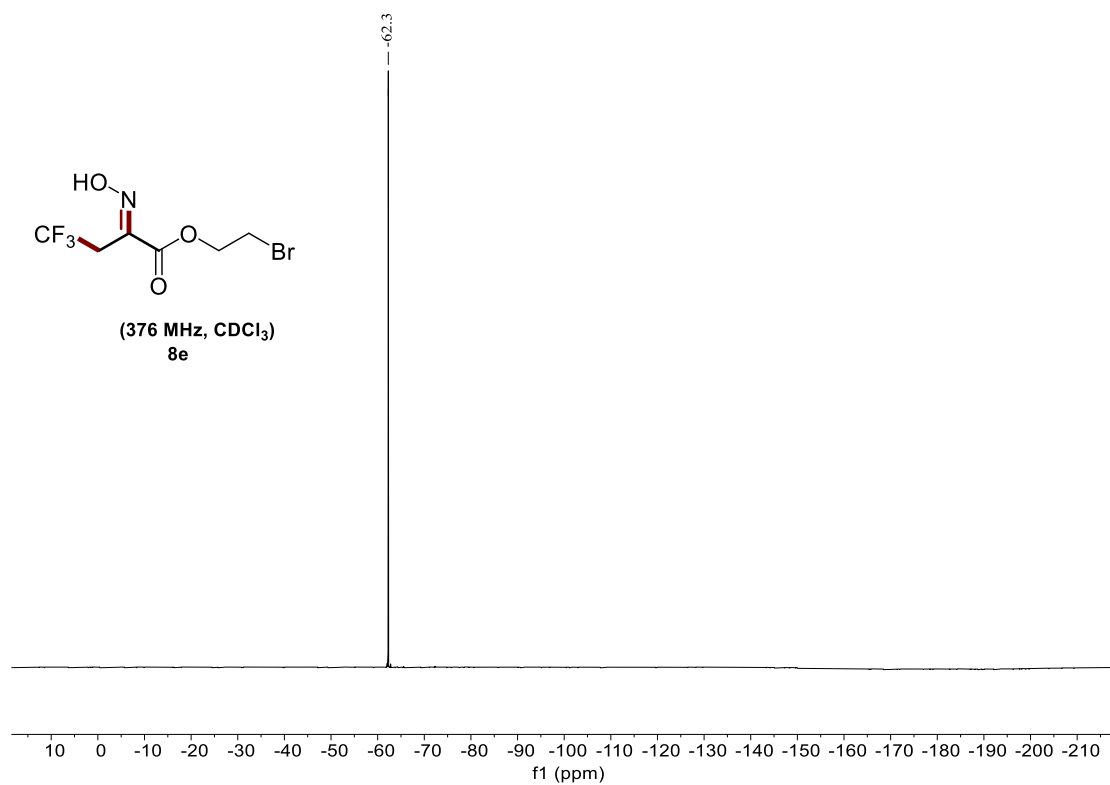

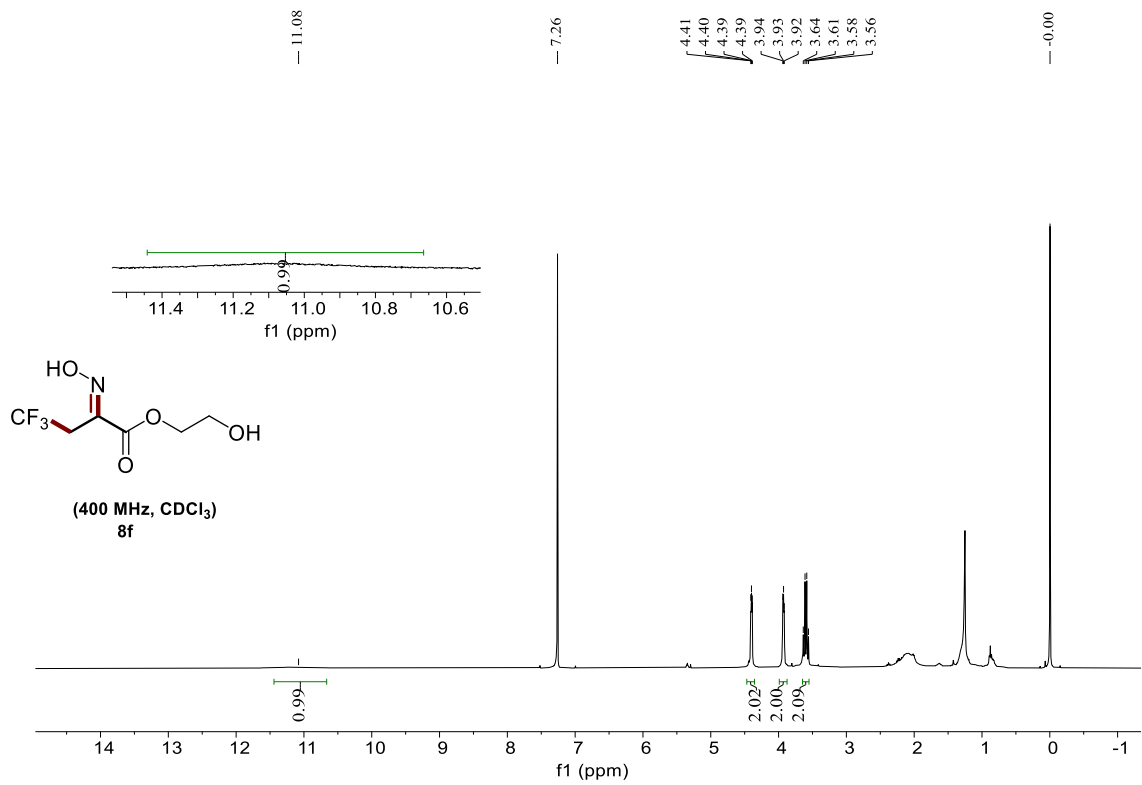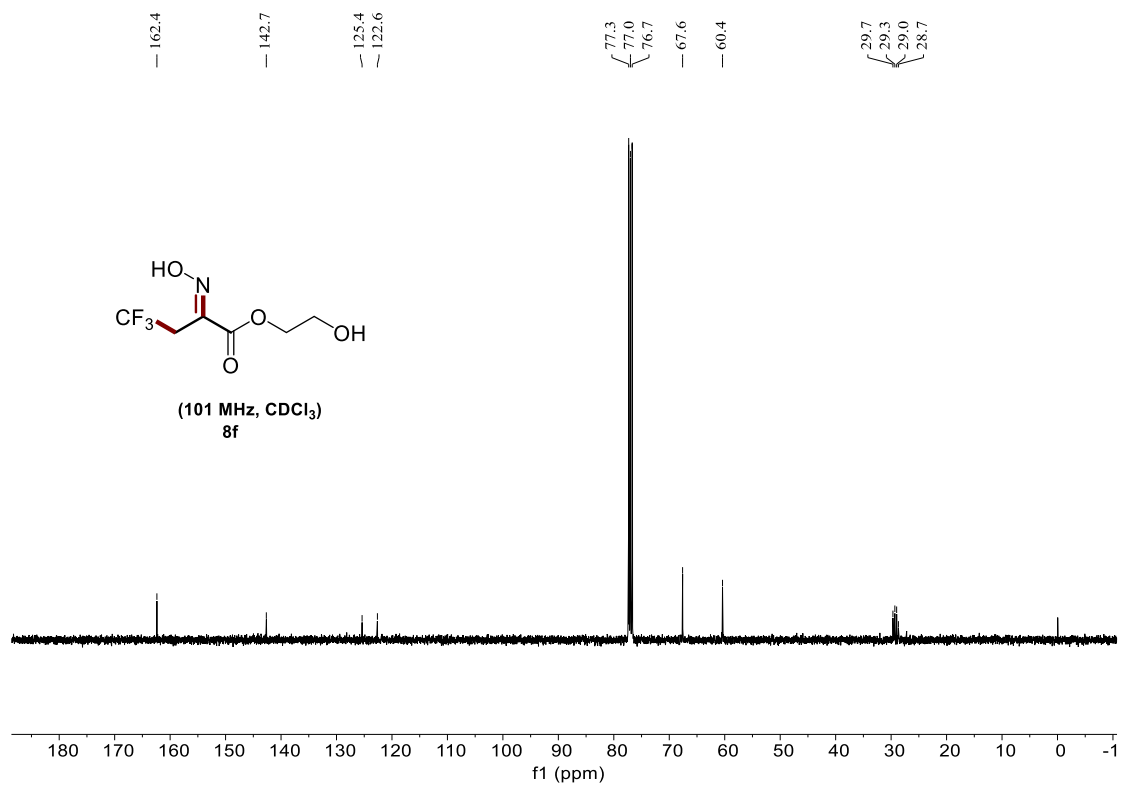

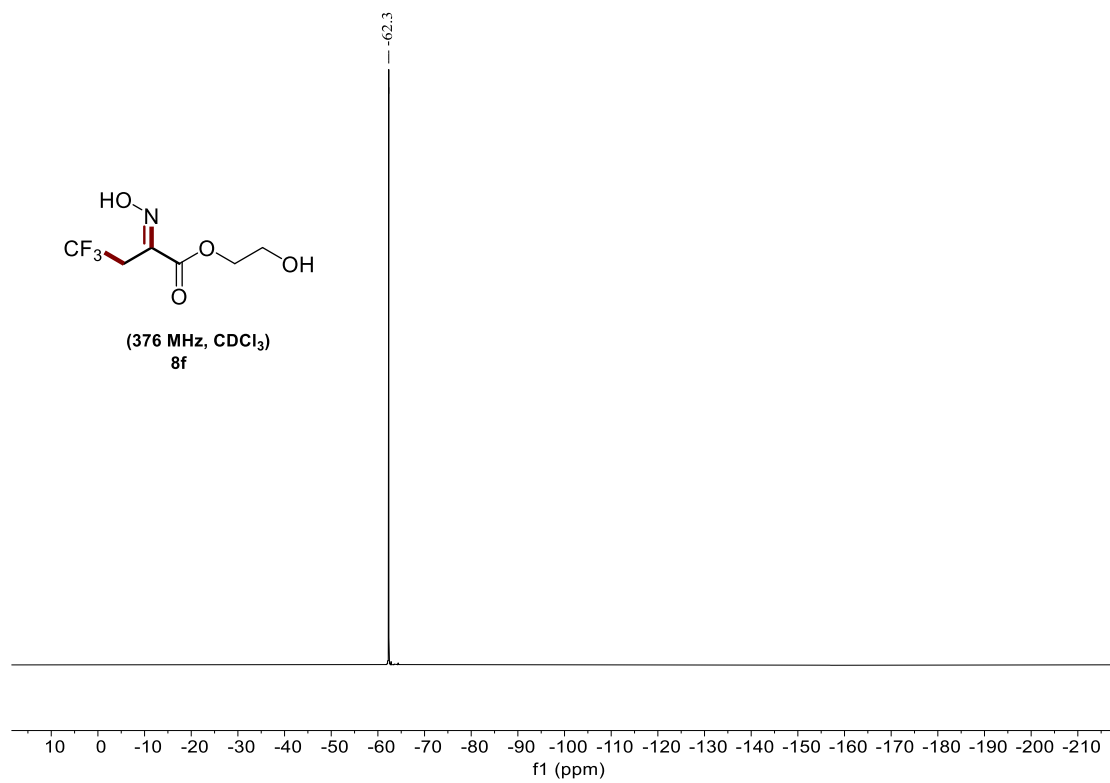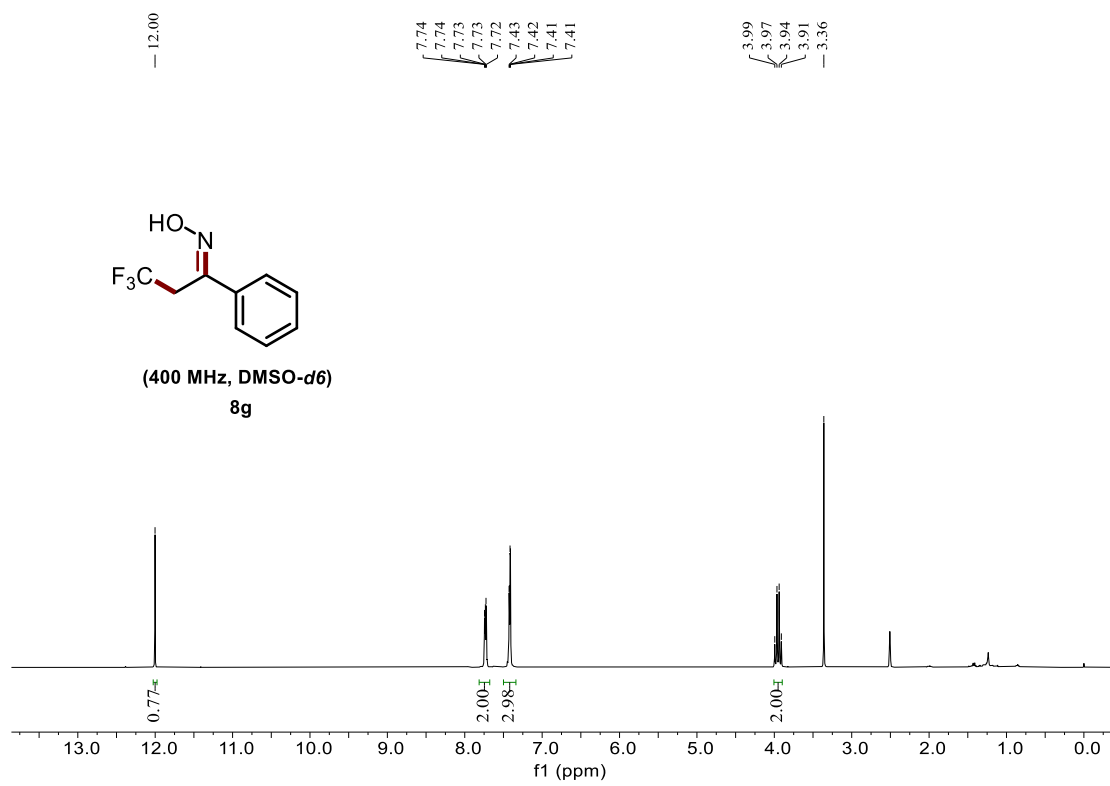



146.9  
134.9  
129.2  
128.4  
126.0  
123.7  
121.0

39.9  
39.7  
39.5  
39.3  
39.1  
29.1  
28.8  
28.5  
28.2

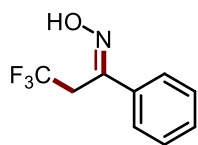

(101 MHz, DMSO-d6)  
8g

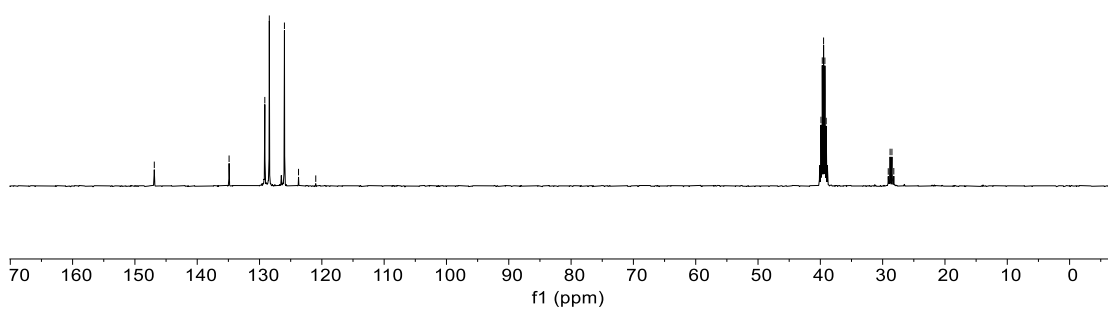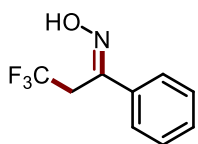

(376 MHz, DMSO-d6)  
8g

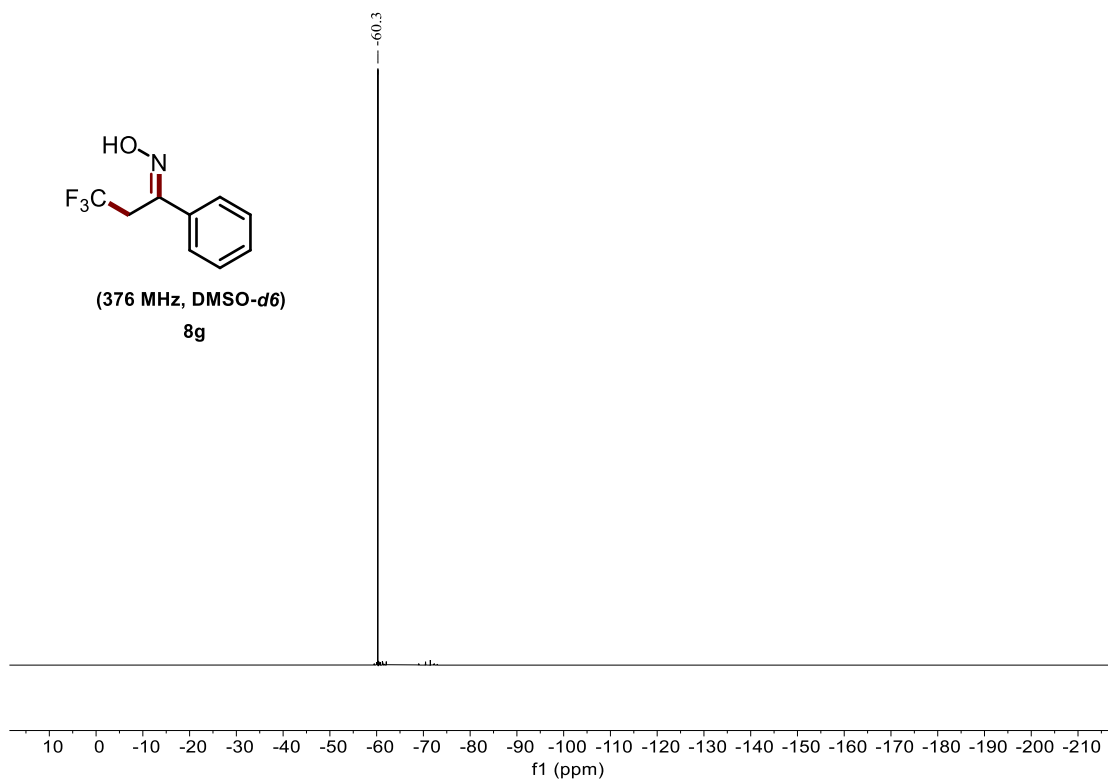

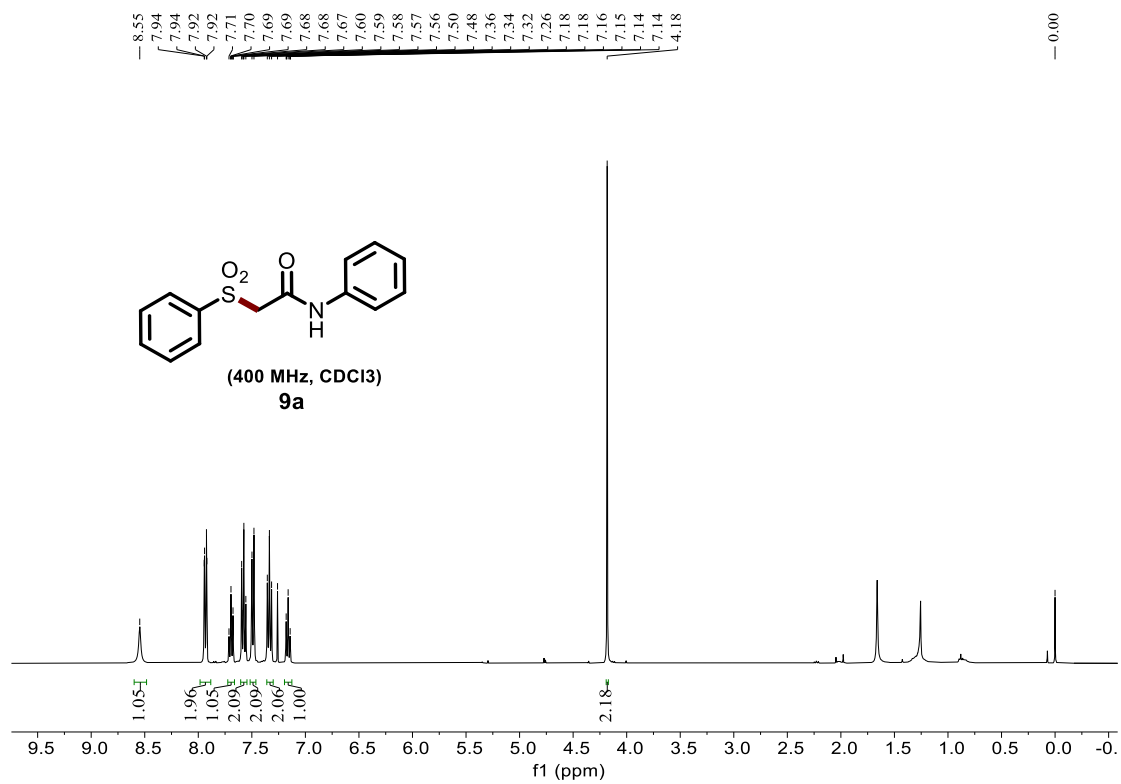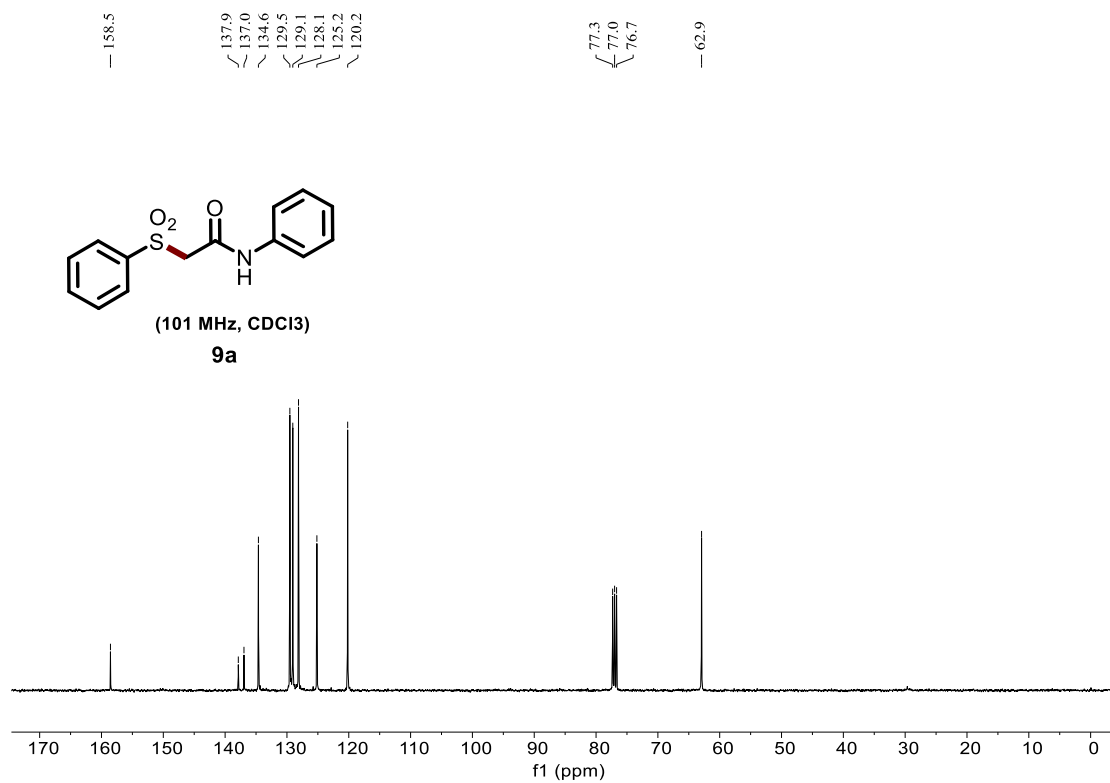

## 6. References

- (1) Y. A. Naumovich, S. L. Ioffe, and A. Y. Sukhorukov, Michael Addition of P-Nucleophiles to Conjugated Nitrosoalkenes, *J. Org. Chem.* **2019**, *84*, 7244.
- (2) Y. A. Naumovich, S. L. Ioffe, and A. Y. Sukhorukov, Michael Addition of P-Nucleophiles to Conjugated Nitrosoalkenes, *Org. Chem. Front.*, **2017**, *4*, 135.
- (3) Y. Wu, Y. Zhang, Z. Yang, J. Jiao, X. Zheng, W. Feng, M. Zhang, H. Cheng, and L. Tang, Dual Role softer t-Butyl Nitrite in the Transition Metal – and External Oxidant-Free Trifluoromethyloximation of Alkenes. *ChemSusChem.*, 2019, *12*, 3960.
